# Supplementary material for: Composition and Expression of Genes Encoding Carbohydrate-Active Enzymes in the Straw-Degrading Mushroom Volvariella volvacea
Source: PLoS One. 2013 Mar 12;8(3):e58780. doi: 10.1371/journal.pone.0058780 (PMC3595290; doi:10.1371/journal.pone.0058780)
Supplement: Table S4 — Differentially expressed genes between PYd21 and PYd15. (XLS) [file pone.0058780.s004.xls]

## Sheet: Table S4
Table S4. Differentially expressed genes between PYd21 and PYd15
Up-regulated genes (470)
Gene	RawIntensity-PYd21	RawIntensity-PYd15	TPM-PYd21	TPM-PYd15	log2 Ratio(PYd15/PYd21)	P-Value	FDR	Pathway	GO Component	GO Function	GO Process	blast nr
GME11100_g	0	4464	0.01	775.83	16.2435	2.22044e-16	2.53088e-15	-	-	-	-	gi|392586388|gb|EIW75725.1|/7.15612e-46/NAD(P)-binding protein [Coniophora puteana RWD-64-598 SS2]
GME7340_g	0	4456	0.01	774.44	16.2409	2.22044e-16	2.54796e-15	-	-	-	-	gi|170112350|ref|XP_001887377.1|/3.38045e-53/predicted protein [Laccaria bicolor S238N-H82]
GME9879_g	0	4301	0.01	747.5	16.1898	2.22044e-16	2.62593e-15	-	-	-	-	gi|170105932|ref|XP_001884178.1|/1.59425e-13/ectomycorrhiza-regulated small secreted protein [Laccaria bicolor S238N-H82]
GME7343_g	0	1806	0.01	313.88	14.9379	2.22044e-16	2.64431e-15	-	-	-	-	gi|170087548|ref|XP_001874997.1|/3.99462e-50/predicted protein [Laccaria bicolor S238N-H82]
GME1292_g	0	1657	0.01	287.98	14.8137	2.22044e-16	2.59346e-15	-	-	-	-	gi|336370977|gb|EGN99317.1|/1.12706e-158/hypothetical protein SERLA73DRAFT_123102 [Serpula lacrymans var. lacrymans S7.3]
GME3772_g	0	719	0.01	124.96	13.6092	2.22044e-16	2.60061e-15	-	-	-	GO:0051704	gi|37529673|gb|AAQ92757.1|/1.55437e-91/volvatoxin A2 precursor [Volvariella volvacea]
GME6498_g	0	604	0.01	104.97	13.3577	2.22044e-16	2.58282e-15	-	-	-	-	-
GME5286_g	0	533	0.01	92.63	13.1773	2.22044e-16	2.53769e-15	-	-	-	-	-
GME10609_g	0	363	0.01	63.09	12.6232	2.22044e-16	2.50403e-15	-	-	-	-	-
GME2755_g	0	256	0.01	44.49	12.1193	2.22044e-16	2.55141e-15	-	-	-	-	-
GME2776_g	0	230	0.01	39.97	11.9647	2.22044e-16	2.55486e-15	ko02020//Two-component system;ko01100//Metabolic pathways;ko00591//Linoleic acid metabolism;ko00051//Fructose and mannose metabolism;ko00362//Benzoate degradation;ko00363//Bisphenol degradation;ko01110//Biosynthesis of secondary metabolites;ko00903//Limonene and pinene degradation;ko00650//Butanoate metabolism;ko00626//Naphthalene degradation;ko00625//Chloroalkane and chloroalkene degradation;ko0…	-	-	-	gi|336370538|gb|EGN98878.1|/4.67337e-108/hypothetical protein SERLA73DRAFT_181580 [Serpula lacrymans var. lacrymans S7.3]
GME8956_g	0	216	0.01	37.54	11.8742	2.22044e-16	2.57929e-15	-	-	-	-	gi|170095874|ref|XP_001879157.1|/9.18913e-63/predicted protein [Laccaria bicolor S238N-H82]
GME3790_g	0	187	0.01	32.5	11.6662	2.22044e-16	2.62958e-15	-	-	-	-	gi|367048783|ref|XP_003654771.1|/1.43422e-14/hypothetical protein THITE_2117974 [Thielavia terrestris NRRL 8126]
GME10937_g	0	180	0.01	31.28	11.611	2.22044e-16	2.65921e-15	-	-	-	GO:0006810//transport	gi|299746724|ref|XP_001840499.2|/0/nitrate transporter [Coprinopsis cinerea okayama7||130]
GME9934_g	0	141	0.01	24.51	11.2592	2.22044e-16	2.68188e-15	-	-	-	-	gi|170097766|ref|XP_001880102.1|/8.64629e-105/predicted protein [Laccaria bicolor S238N-H82]
GME418_g	0	140	0.01	24.33	11.2485	2.22044e-16	2.5275e-15	-	-	-	-	-
GME7345_g	0	139	0.01	24.16	11.2384	2.22044e-16	2.67807e-15	-	-	-	-	gi|296413844|ref|XP_002836618.1|/2.74612e-124/hypothetical protein [Tuber melanosporum Mel28]
GME7601_g	0	117	0.01	20.33	10.9894	2.22044e-16	2.65547e-15	ko00930//Caprolactam degradation;ko01120//Microbial metabolism in diverse environments	-	GO:0016491//oxidoreductase activity	-	gi|170093614|ref|XP_001878028.1|/6.10887e-143/predicted protein [Laccaria bicolor S238N-H82]
GME2046_g	0	117	0.01	20.33	10.9894	2.22044e-16	2.6114e-15	-	-	-	-	gi|390596443|gb|EIN05845.1|/1.13308e-06/hypothetical protein PUNSTDRAFT_145751 [Punctularia strigosozonata HHB-11173 SS5]
GME4069_g	0	116	0.01	20.16	10.9773	2.22044e-16	2.57226e-15	ko00040//Pentose and glucuronate interconversions	-	GO:0003824//catalytic activity	GO:0008152//metabolic process	gi|170093738|ref|XP_001878090.1|/8.16972e-119/predicted protein [Laccaria bicolor S238N-H82]
GME1047_g	0	103	0.01	17.9	10.8057	2.22044e-16	2.67428e-15	-	-	-	-	gi|336368838|gb|EGN97180.1|/5.12447e-65/hypothetical protein SERLA73DRAFT_183827 [Serpula lacrymans var. lacrymans S7.3]
GME9065_g	0	103	0.01	17.9	10.8057	2.22044e-16	2.63693e-15	-	-	-	-	gi|299746075|ref|XP_001837715.2|/9.41212e-45/hypothetical protein CC1G_06921 [Coprinopsis cinerea okayama7||130]
GME9241_g	0	103	0.01	17.9	10.8057	2.22044e-16	2.54453e-15	ko02020//Two-component system;ko01100//Metabolic pathways;ko00591//Linoleic acid metabolism;ko00051//Fructose and mannose metabolism;ko00362//Benzoate degradation;ko00363//Bisphenol degradation;ko01110//Biosynthesis of secondary metabolites;ko00903//Limonene and pinene degradation;ko00650//Butanoate metabolism;ko00626//Naphthalene degradation;ko00625//Chloroalkane and chloroalkene degradation;ko0…	-	-	-	gi|242218907|ref|XP_002475239.1|/1.91401e-149/candidate aryl-alcohol dehydrogenase [Postia placenta Mad-698-R]
GME5021_g	0	98	0.01	17.03	10.7339	2.22044e-16	2.68952e-15	-	-	-	-	gi|170108854|ref|XP_001885635.1|/2.92104e-76/predicted protein [Laccaria bicolor S238N-H82]
GME5917_g	0	95	0.01	16.51	10.6891	2.22044e-16	2.51069e-15	-	-	-	-	gi|170091822|ref|XP_001877133.1|/4.94391e-92/aspartic peptidase A1 [Laccaria bicolor S238N-H82]
GME8981_g	0	92	0.01	15.99	10.643	2.22044e-16	2.61501e-15	-	-	-	-	gi|336390120|gb|EGO31263.1|/1.29958e-13/hypothetical protein SERLADRAFT_432916 [Serpula lacrymans var. lacrymans S7.9]
GME477_g	0	92	0.01	15.99	10.643	2.22044e-16	2.60779e-15	-	-	-	-	gi|393218629|gb|EJD04117.1|/8.43226e-74/RTA1-domain-containing protein [Fomitiporia mediterranea MF3/22]
GME3570_g	0	82	0.01	14.25	10.4767	2.22044e-16	2.52412e-15	ko01100//Metabolic pathways;ko04723//Retrograde endocannabinoid signaling;ko04726//Serotonergic synapse;ko04064//NF-kappa B signaling pathway;ko04370//VEGF signaling pathway;ko05200//Pathways in cancer;ko00590//Arachidonic acid metabolism;ko05222//Small cell lung cancer;ko05140//Leishmaniasis	-	GO:0016491//oxidoreductase activity;GO:0005506//iron ion binding	-	gi|389741315|gb|EIM82504.1|/0/heme peroxidase [Stereum hirsutum FP-91666 SS1]
GME2808_g	0	81	0.01	14.08	10.4594	2.22044e-16	2.55832e-15	-	-	-	-	gi|336363180|gb|EGN91607.1|/3.34587e-49/hypothetical protein SERLA73DRAFT_192210 [Serpula lacrymans var. lacrymans S7.3]
GME3585_g	0	79	0.01	13.73	10.4231	2.22044e-16	2.57577e-15	-	-	-	-	gi|403419469|emb|CCM06169.1|/1.38636e-34/predicted protein [Fibroporia radiculosa]
GME5700_g	0	78	0.01	13.56	10.4051	2.22044e-16	2.61864e-15	ko00460//Cyanoamino acid metabolism;ko01100//Metabolic pathways;ko00250//Alanine, aspartate and glutamate metabolism;ko00330//Arginine and proline metabolism;ko00910//Nitrogen metabolism;ko01110//Biosynthesis of secondary metabolites	-	GO:0016639//oxidoreductase activity, acting on the CH-NH2 group of donors, NAD or NADP as acceptor	GO:0019752//carboxylic acid metabolic process	gi|302678341|ref|XP_003028853.1|/0/hypothetical protein SCHCODRAFT_69850 [Schizophyllum commune H4-8]
GME9214_g	0	77	0.01	13.38	10.3859	2.22044e-16	2.58636e-15	ko05215//Prostate cancer;ko05200//Pathways in cancer;ko00480//Glutathione metabolism;ko00980//Metabolism of xenobiotics by cytochrome P450;ko00982//Drug metabolism - cytochrome P450	-	GO:0003824//catalytic activity	-	gi|169863781|ref|XP_001838508.1|/3.30265e-77/glutathione S-transferase [Coprinopsis cinerea okayama7||130]
GME7757_g	0	75	0.01	13.03	10.3476	2.22044e-16	2.6705e-15	-	-	GO:0004553//hydrolase activity, hydrolyzing O-glycosyl compounds	GO:0000272//polysaccharide catabolic process	gi|238604697|ref|XP_002396267.1|/1.47508e-28/hypothetical protein MPER_03534 [Moniliophthora perniciosa FA553]
GME2169_g	0	75	0.01	13.03	10.3476	2.22044e-16	2.56527e-15	-	-	GO:0003824//catalytic activity	-	gi|302674449|ref|XP_003026909.1|/8.93354e-130/hypothetical protein SCHCODRAFT_70977 [Schizophyllum commune H4-8]
GME9087_g	0	74	0.01	12.86	10.3287	2.22044e-16	2.60419e-15	-	-	-	-	gi|299752644|ref|XP_001841141.2|/1.44896e-14/HNWD1 [Coprinopsis cinerea okayama7||130]
GME664_g	0	70	0.01	12.17	10.2491	2.22044e-16	2.56179e-15	-	-	-	-	gi|299751338|ref|XP_002911625.1|/4.75584e-38/hypothetical protein CC1G_14158 [Coprinopsis cinerea okayama7||130]
GME9092_g	0	70	0.01	12.17	10.2491	2.22044e-16	2.53428e-15	-	GO:0031224//intrinsic to membrane	-	GO:0015833//peptide transport	gi|71482913|gb|AAZ32402.1|/0/peptide transporter PTR2B [Hebeloma cylindrosporum]
GME4999_g	0	65	0.01	11.3	10.1421	2.22044e-16	2.68569e-15	ko02020//Two-component system;ko01100//Metabolic pathways;ko00790//Folate biosynthesis;ko00627//Aminobenzoate degradation;ko01120//Microbial metabolism in diverse environments;ko04120//Ubiquitin mediated proteolysis	-	-	-	gi|170107207|ref|XP_001884814.1|/5.24939e-24/predicted protein [Laccaria bicolor S238N-H82]
GME7789_g	0	65	0.01	11.3	10.1421	2.22044e-16	2.66672e-15	-	-	-	-	gi|395330047|gb|EJF62431.1|/2.16482e-28/hypothetical protein DICSQDRAFT_135398 [Dichomitus squalens LYAD-421 SS1]
GME5181_g	0	64	0.01	11.12	10.1189	2.22044e-16	2.5411e-15	-	-	-	-	gi|170113414|ref|XP_001887907.1|/7.26488e-23/predicted protein [Laccaria bicolor S238N-H82]
GME1536_g	0	62	0.01	10.78	10.0741	2.22044e-16	2.63325e-15	ko03013//RNA transport;ko00040//Pentose and glucuronate interconversions	-	-	-	gi|390594932|gb|EIN04340.1|/1.77971e-93/NAD(P)-binding protein [Punctularia strigosozonata HHB-11173 SS5]
GME7592_g	0	61	0.01	10.6	10.0498	2.22044e-16	2.51739e-15	-	-	-	-	-
GME6299_g	0	58	0.01	10.08	9.97728	2.22044e-16	2.69335e-15	-	-	-	-	gi|392592491|gb|EIW81817.1|/8.93029e-39/hypothetical protein CONPUDRAFT_72203 [Coniophora puteana RWD-64-598 SS2]
GME6786_g	0	57	0.01	9.91	9.95274	2.22044e-16	2.59703e-15	-	-	-	-	-
GME2106_g	0	57	0.01	9.91	9.95274	2.22044e-16	2.51403e-15	ko00620//Pyruvate metabolism;ko01100//Metabolic pathways;ko00710//Carbon fixation in photosynthetic organisms;ko03320//PPAR signaling pathway;ko01120//Microbial metabolism in diverse environments	-	GO:0016615//malate dehydrogenase activity;GO:0000166//nucleotide binding;GO:0043169//cation binding	GO:0043648//dicarboxylic acid metabolic process	gi|299743333|ref|XP_001835695.2|/0/malate dehydrogenase [Coprinopsis cinerea okayama7||130]
GME11949_g	0	56	0.01	9.73	9.9263	2.22044e-16	2.65174e-15	-	-	-	-	gi|302687468|ref|XP_003033414.1|/7.60574e-29/hypothetical protein SCHCODRAFT_108264 [Schizophyllum commune H4-8]
GME6477_g	0	56	0.01	9.73	9.9263	2.22044e-16	2.5899e-15	-	-	-	-	gi|390598606|gb|EIN08004.1|/1.91351e-06/hypothetical protein PUNSTDRAFT_135521 [Punctularia strigosozonata HHB-11173 SS5]
GME11821_g	0	54	0.01	9.39	9.87498	2.22044e-16	2.66296e-15	-	-	-	-	gi|393216144|gb|EJD01635.1|/2.27213e-30/hypothetical protein FOMMEDRAFT_158789 [Fomitiporia mediterranea MF3/22]
GME122_g	0	54	0.01	9.39	9.87498	2.22044e-16	2.64062e-15	-	-	-	-	gi|386649505|gb|AFJ15558.1|/1.24019e-79/putative aquaporin 4 [Laccaria bicolor]
GME1222_g	0	54	0.01	9.39	9.87498	2.22044e-16	2.52075e-15	-	-	-	-	gi|302891197|ref|XP_003044481.1|/4.65553e-11/hypothetical protein NECHADRAFT_82990 [Nectria haematococca mpVI 77-13-4]
GME2976_g	0	52	0.01	9.04	9.82018	2.22044e-16	2.62228e-15	ko02020//Two-component system;ko01100//Metabolic pathways;ko00591//Linoleic acid metabolism;ko00051//Fructose and mannose metabolism;ko00362//Benzoate degradation;ko00363//Bisphenol degradation;ko01110//Biosynthesis of secondary metabolites;ko00903//Limonene and pinene degradation;ko00650//Butanoate metabolism;ko00626//Naphthalene degradation;ko00625//Chloroalkane and chloroalkene degradation;ko0…	-	-	-	gi|336375497|gb|EGO03833.1|/1.34043e-104/hypothetical protein SERLA73DRAFT_175487 [Serpula lacrymans var. lacrymans S7.3]
GME4886_g	0	50	0.01	8.69	9.76321	4.4409e-16	4.96855e-15	-	-	-	-	gi|390604557|gb|EIN13948.1|/2.00075e-79/FAD/NAD(P)-binding domain-containing protein [Punctularia strigosozonata HHB-11173 SS5]
GME4641_g	0	49	0.01	8.52	9.73471	8.88178e-16	9.83356e-15	-	-	-	-	gi|238584129|ref|XP_002390464.1|/1.04859e-27/hypothetical protein MPER_10249 [Moniliophthora perniciosa FA553]
GME5549_g	0	49	0.01	8.52	9.73471	8.88178e-16	9.82078e-15	ko04260//Cardiac muscle contraction;ko05416//Viral myocarditis;ko05410//Hypertrophic cardiomyopathy (HCM);ko04270//Vascular smooth muscle contraction;ko04530//Tight junction;ko05132//Salmonella infection;ko04810//Regulation of actin cytoskeleton;ko05414//Dilated cardiomyopathy;ko05200//Pathways in cancer;ko04011//MAPK signaling pathway - yeast;ko05216//Thyroid cancer;ko03013//RNA transport	-	-	-	gi|388853641|emb|CCF52813.1|/6.44301e-13/related to Myosin heavy chain [Ustilago hordei]
GME3571_g	0	47	0.01	8.17	9.67419	3.33066e-15	3.60772e-14	-	-	-	-	gi|299742891|ref|XP_001835401.2|/2.56949e-140/hypothetical protein CC1G_05363 [Coprinopsis cinerea okayama7||130]
GME3771_g	0	47	0.01	8.17	9.67419	3.33066e-15	3.60313e-14	-	-	-	-	gi|63079023|gb|AAY29572.1|/2.9821e-145/volvatoxin A1 precursor [Volvariella volvacea]
GME474_g	0	47	0.01	8.17	9.67419	3.33066e-15	3.59855e-14	-	-	-	-	gi|390603592|gb|EIN12984.1|/1.05743e-71/RTA1-like protein [Punctularia strigosozonata HHB-11173 SS5]
GME2778_g	0	47	0.01	8.17	9.67419	3.33066e-15	3.59399e-14	-	-	-	-	gi|299738246|ref|XP_001838211.2|/8.74743e-70/hypothetical protein CC1G_07952 [Coprinopsis cinerea okayama7||130]
GME1535_g	0	46	0.01	7.99	9.64205	6.66134e-15	7.13367e-14	ko03013//RNA transport;ko03430//Mismatch repair;ko01100//Metabolic pathways;ko03440//Homologous recombination;ko01040//Biosynthesis of unsaturated fatty acids;ko00061//Fatty acid biosynthesis;ko01110//Biosynthesis of secondary metabolites;ko00640//Propanoate metabolism;ko00620//Pyruvate metabolism;ko03410//Base excision repair;ko01120//Microbial metabolism in diverse environments;ko00040//Pentose…	-	-	-	gi|390594932|gb|EIN04340.1|/3.2668e-113/NAD(P)-binding protein [Punctularia strigosozonata HHB-11173 SS5]
GME6800_g	0	46	0.01	7.99	9.64205	6.66134e-15	7.1247e-14	-	-	-	-	gi|170100533|ref|XP_001881484.1|/1.47718e-23/predicted protein [Laccaria bicolor S238N-H82]
GME1389_g	0	45	0.01	7.82	9.61102	1.33227e-14	1.39855e-13	-	-	-	-	-
GME7495_g	0	45	0.01	7.82	9.61102	1.33227e-14	1.39683e-13	ko00930//Caprolactam degradation;ko01120//Microbial metabolism in diverse environments;ko00982//Drug metabolism - cytochrome P450;ko01120//Microbial metabolism in diverse environments;ko00680//Methane metabolism	-	-	-	gi|336371787|gb|EGO00127.1|/0/hypothetical protein SERLA73DRAFT_107112 [Serpula lacrymans var. lacrymans S7.3]
GME10218_g	0	44	0.01	7.65	9.57932	2.68674e-14	2.72943e-13	ko04113//Meiosis - yeast	GO:0031224//intrinsic to membrane	GO:0022857//transmembrane transporter activity	GO:0071702	gi|170107843|ref|XP_001885131.1|/0/predicted protein [Laccaria bicolor S238N-H82]
GME3755_g	0	44	0.01	7.65	9.57932	2.68674e-14	2.72618e-13	-	-	-	-	-
GME7442_g	0	42	0.01	7.3	9.51175	1.09912e-13	1.01145e-12	-	-	-	-	gi|336365701|gb|EGN94050.1|/0/hypothetical protein SERLA73DRAFT_188606 [Serpula lacrymans var. lacrymans S7.3]
GME11946_g	0	40	0.01	6.95	9.44087	4.53638e-13	3.52263e-12	-	-	-	-	gi|302687468|ref|XP_003033414.1|/1.81337e-14/hypothetical protein SCHCODRAFT_108264 [Schizophyllum commune H4-8]
GME3727_g	21	10915	3.53	1896.99	9.06983	2.37804e-09	1.29785e-08	-	-	-	-	gi|170100865|ref|XP_001881650.1|/6.3896e-88/predicted protein [Laccaria bicolor S238N-H82]
GME10458_g	10	4843	1.68	841.7	8.9687	1.90502e-06	7.75042e-06	-	-	-	-	gi|37529673|gb|AAQ92757.1|/1.29878e-38/volvatoxin A2 precursor [Volvariella volvacea]
GME7347_g	5	2021	0.84	351.24	8.70785	3.0013e-05	0.000102986	-	-	-	-	gi|170112350|ref|XP_001887377.1|/1.07261e-64/predicted protein [Laccaria bicolor S238N-H82]
GME2914_g	42	9862	7.06	1713.98	7.92347	1.01252e-13	9.52377e-13	ko00750//Vitamin B6 metabolism;ko01100//Metabolic pathways;ko00350//Tyrosine metabolism;ko01120//Microbial metabolism in diverse environments;ko00680//Methane metabolism;ko00260//Glycine, serine and threonine metabolism;ko00624//Polycyclic aromatic hydrocarbon degradation;ko00361//Chlorocyclohexane and chlorobenzene degradation;ko01120//Microbial metabolism in diverse environments;ko00640//Propan…	-	-	-	gi|389747731|gb|EIM88909.1|/3.4009e-73/NAD-P-binding protein [Stereum hirsutum FP-91666 SS1]
GME3686_g	5	1161	0.84	201.78	7.90818	3.0013e-05	0.000103236	ko01100//Metabolic pathways;ko00624//Polycyclic aromatic hydrocarbon degradation;ko00340//Histidine metabolism;ko00623//Toluene degradation;ko00627//Aminobenzoate degradation;ko00361//Chlorocyclohexane and chlorobenzene degradation;ko00363//Bisphenol degradation;ko00903//Limonene and pinene degradation;ko00626//Naphthalene degradation;ko01120//Microbial metabolism in diverse environments;ko01100/…	-	-	-	gi|392973385|gb|AFM94294.1|/0/FAD binding domain-containing protein [Volvariella volvacea]
GME3768_g	11	2018	1.85	350.72	7.56665	1.06112e-06	4.46668e-06	-	-	-	-	gi|37529673|gb|AAQ92757.1|/2.89337e-38/volvatoxin A2 precursor [Volvariella volvacea]
GME5141_g	2	326	0.34	56.66	7.38065	0.000119013	0.000366391	-	-	-	-	gi|336377807|gb|EGO18967.1|/3.51942e-11/hypothetical protein SERLADRAFT_443513 [Serpula lacrymans var. lacrymans S7.9]
GME6495_g	3	333	0.5	57.87	6.85474	7.72612e-05	0.000247813	-	-	-	-	gi|353238747|emb|CCA70684.1|/8.06221e-27/hypothetical protein PIIN_04618 [Piriformospora indica DSM 11827]
GME11102_g	36	3515	6.05	610.89	6.65783	3.64154e-13	2.87236e-12	-	-	-	-	gi|336368838|gb|EGN97180.1|/2.72921e-71/hypothetical protein SERLA73DRAFT_183827 [Serpula lacrymans var. lacrymans S7.3]
GME3681_g	16	1246	2.69	216.55	6.33095	5.23262e-08	2.51942e-07	ko01100//Metabolic pathways;ko00240//Pyrimidine metabolism;ko01100//Metabolic pathways;ko00564//Glycerophospholipid metabolism;ko00565//Ether lipid metabolism	-	GO:0003824//catalytic activity	GO:0008152//metabolic process	gi|302691530|ref|XP_003035444.1|/4.35399e-101/hypothetical protein SCHCODRAFT_51754 [Schizophyllum commune H4-8]
GME5101_g	4	291	0.67	50.57	6.23798	4.90594e-05	0.00016295	-	-	-	-	gi|393218629|gb|EJD04117.1|/1.51071e-71/RTA1-domain-containing protein [Fomitiporia mediterranea MF3/22]
GME4565_g	2	136	0.34	23.64	6.11955	0.000119013	0.000366258	-	-	-	-	gi|336365509|gb|EGN93859.1|/7.25481e-91/hypothetical protein SERLA73DRAFT_188970 [Serpula lacrymans var. lacrymans S7.3]
GME443_g	2	114	0.34	19.81	5.86455	0.000119013	0.000367322	-	-	-	-	gi|170103344|ref|XP_001882887.1|/2.63129e-25/predicted protein [Laccaria bicolor S238N-H82]
GME510_g	11	575	1.85	99.93	5.75532	1.06112e-06	4.46226e-06	-	-	-	-	gi|170096534|ref|XP_001879487.1|/2.13076e-39/predicted protein [Laccaria bicolor S238N-H82]
GME10575_g	6	306	1.01	53.18	5.71846	1.78632e-05	6.41159e-05	-	-	-	-	gi|170114193|ref|XP_001888294.1|/5.886e-118/predicted protein [Laccaria bicolor S238N-H82]
GME3221_g	281	13958	47.22	2425.85	5.68295	0	0	ko01110//Biosynthesis of secondary metabolites;ko00640//Propanoate metabolism;ko00330//Arginine and proline metabolism;ko00010//Glycolysis / Gluconeogenesis;ko00410//beta-Alanine metabolism;ko00380//Tryptophan metabolism;ko01120//Microbial metabolism in diverse environments;ko02020//Two-component system;ko00071//Fatty acid metabolism;ko00340//Histidine metabolism;ko01100//Metabolic pathways;ko005…	-	GO:0004030//aldehyde dehydrogenase [NAD(P)+] activity	GO:0008152//metabolic process	gi|170117563|ref|XP_001889968.1|/0/aldehyde dehydrogenase [Laccaria bicolor S238N-H82]
GME7342_g	3	143	0.5	24.85	5.63517	7.72612e-05	0.000248094	-	-	-	-	gi|170112350|ref|XP_001887377.1|/5.60249e-52/predicted protein [Laccaria bicolor S238N-H82]
GME11676_g	17	786	2.86	136.6	5.5778	2.83294e-08	1.39968e-07	-	-	-	-	gi|403414735|emb|CCM01435.1|/1.83047e-20/predicted protein [Fibroporia radiculosa]
GME12060_g	12	547	2.02	95.07	5.55656	5.8705e-07	2.53643e-06	ko01100//Metabolic pathways;ko00071//Fatty acid metabolism;ko01110//Biosynthesis of secondary metabolites;ko00626//Naphthalene degradation;ko00010//Glycolysis / Gluconeogenesis;ko00625//Chloroalkane and chloroalkene degradation;ko00350//Tyrosine metabolism;ko01120//Microbial metabolism in diverse environments	-	-	-	gi|169863937|ref|XP_001838583.1|/3.78279e-76/hypothetical protein CC1G_12719 [Coprinopsis cinerea okayama7||130]
GME1192_g	2	87	0.34	15.12	5.47478	0.000119013	0.000366789	ko02020//Two-component system;ko01100//Metabolic pathways;ko00591//Linoleic acid metabolism;ko00051//Fructose and mannose metabolism;ko00362//Benzoate degradation;ko00363//Bisphenol degradation;ko01110//Biosynthesis of secondary metabolites;ko00903//Limonene and pinene degradation;ko00650//Butanoate metabolism;ko00626//Naphthalene degradation;ko00625//Chloroalkane and chloroalkene degradation;ko0…	-	-	-	gi|390594932|gb|EIN04340.1|/1.3683e-103/NAD(P)-binding protein [Punctularia strigosozonata HHB-11173 SS5]
GME2753_g	9	379	1.51	65.87	5.447	3.39234e-06	1.33728e-05	ko00650//Butanoate metabolism;ko01100//Metabolic pathways;ko00250//Alanine, aspartate and glutamate metabolism;ko04727//GABAergic synapse;ko04940//Type I diabetes mellitus;ko00410//beta-Alanine metabolism;ko01110//Biosynthesis of secondary metabolites;ko00430//Taurine and hypotaurine metabolism	-	-	-	gi|395327428|gb|EJF59828.1|/1.3844e-149/PLP-dependent transferase [Dichomitus squalens LYAD-421 SS1]
GME3243_g	493	20705	82.84	3598.46	5.44091	4.37428e-13	3.40609e-12	-	GO:0031224//intrinsic to membrane	-	-	gi|169856913|ref|XP_001835110.1|/1.57825e-74/Gpr1 family protein [Coprinopsis cinerea okayama7||130]
GME803_g	6	247	1.01	42.93	5.40956	1.78632e-05	6.40889e-05	-	-	-	-	gi|169847440|ref|XP_001830431.1|/2.10911e-107/hypothetical protein CC1G_07346 [Coprinopsis cinerea okayama7||130]
GME4885_g	13	532	2.18	92.46	5.40643	3.22918e-07	1.43908e-06	ko00624//Polycyclic aromatic hydrocarbon degradation;ko01100//Metabolic pathways;ko00627//Aminobenzoate degradation;ko00363//Bisphenol degradation;ko01110//Biosynthesis of secondary metabolites;ko00903//Limonene and pinene degradation;ko00945//Stilbenoid, diarylheptanoid and gingerol biosynthesis;ko01120//Microbial metabolism in diverse environments;ko01100//Metabolic pathways;ko00360//Phenylalan…	-	GO:0046872//metal ion binding	-	gi|390596975|gb|EIN06375.1|/2.87744e-154/cytochrome P450 [Punctularia strigosozonata HHB-11173 SS5]
GME5630_g	7	282	1.18	49.01	5.37622	1.04175e-05	3.86137e-05	-	-	-	-	-
GME2845_g	27	1080	4.54	187.7	5.36959	5.63664e-11	3.55552e-10	-	-	-	-	gi|336378442|gb|EGO19600.1|/2.665e-55/hypothetical protein SERLADRAFT_402103 [Serpula lacrymans var. lacrymans S7.9]
GME11677_g	48	1868	8.07	324.65	5.33017	1.01474e-13	9.50261e-13	-	-	-	-	gi|392572049|gb|EIW65221.1|/2.11276e-31/hypothetical protein TRAVEDRAFT_68765 [Trametes versicolor FP-101664 SS1]
GME7_g	13	490	2.18	85.16	5.28778	3.22918e-07	1.43682e-06	-	-	-	-	gi|299754848|ref|XP_002912039.1|/9.13993e-84/D-lactaldehyde dehydrogenase [Coprinopsis cinerea okayama7||130]
GME6476_g	133	4788	22.35	832.14	5.21848	9.72556e-14	9.16812e-13	ko01100//Metabolic pathways;ko00240//Pyrimidine metabolism	-	GO:0003824//catalytic activity	GO:0008152//metabolic process	gi|302691530|ref|XP_003035444.1|/6.86621e-89/hypothetical protein SCHCODRAFT_51754 [Schizophyllum commune H4-8]
GME6423_g	13	464	2.18	80.64	5.2091	3.22918e-07	1.43532e-06	-	-	-	-	-
GME9882_g	5	177	0.84	30.76	5.19452	3.0013e-05	0.000103195	-	-	-	-	gi|170105932|ref|XP_001884178.1|/7.17216e-24/ectomycorrhiza-regulated small secreted protein [Laccaria bicolor S238N-H82]
GME11737_g	2	71	0.34	12.34	5.18166	0.000119013	0.000366523	-	-	-	-	gi|299746420|ref|XP_002911048.1|/4.01916e-19/other/AgaK1 protein kinase [Coprinopsis cinerea okayama7||130]
GME4627_g	4	139	0.67	24.16	5.17232	4.90594e-05	0.000162569	ko05166//HTLV-I infection;ko05166//HTLV-I infection	GO:0043231//intracellular membrane-bounded organelle	GO:0003676//nucleic acid binding	-	gi|169863899|ref|XP_001838565.1|/8.38043e-87/hypothetical protein CC1G_11894 [Coprinopsis cinerea okayama7||130]
GME6510_g	10	348	1.68	60.48	5.16993	1.90502e-06	7.74301e-06	-	-	-	-	-
GME6696_g	120	4084	20.17	709.79	5.13711	0	0	-	-	GO:0016829//lyase activity	-	gi|169860003|ref|XP_001836638.1|/6.06326e-161/oxalate decarboxylase [Coprinopsis cinerea okayama7||130]
GME11101_g	126	4283	21.17	744.37	5.13593	6.9278e-14	6.71689e-13	-	-	-	-	gi|336368838|gb|EGN97180.1|/3.08767e-70/hypothetical protein SERLA73DRAFT_183827 [Serpula lacrymans var. lacrymans S7.3]
GME3674_g	15	497	2.52	86.38	5.0992	9.6347e-08	4.50131e-07	ko01100//Metabolic pathways;ko00624//Polycyclic aromatic hydrocarbon degradation;ko00340//Histidine metabolism;ko00540//Lipopolysaccharide biosynthesis;ko01120//Microbial metabolism in diverse environments;ko00350//Tyrosine metabolism	-	-	-	gi|336368777|gb|EGN97119.1|/2.14705e-127/hypothetical protein SERLA73DRAFT_92093 [Serpula lacrymans var. lacrymans S7.3]
GME1075_g	4	131	0.67	22.77	5.08683	4.90594e-05	0.000162696	-	-	-	-	gi|395324606|gb|EJF57043.1|/2.54237e-55/hypothetical protein DICSQDRAFT_92799 [Dichomitus squalens LYAD-421 SS1]
GME399_g	2	66	0.34	11.47	5.07619	0.000119013	0.000366126	ko03060//Protein export	-	-	-	gi|170100661|ref|XP_001881548.1|/2.25427e-61/predicted protein [Laccaria bicolor S238N-H82]
GME2834_g	21	685	3.53	119.05	5.07576	2.37804e-09	1.29702e-08	-	-	-	-	-
GME5816_g	20	651	3.36	113.14	5.0735	4.4301e-09	2.36318e-08	ko00190//Oxidative phosphorylation	-	-	-	gi|389751133|gb|EIM92206.1|/4.03749e-95/FAD/NAD-P-binding domain-containing protein [Stereum hirsutum FP-91666 SS1]
GME9866_g	39	1266	6.55	220.03	5.07006	1.38112e-13	1.22457e-12	-	-	-	-	gi|170105932|ref|XP_001884178.1|/1.91793e-11/ectomycorrhiza-regulated small secreted protein [Laccaria bicolor S238N-H82]
GME3675_g	5	162	0.84	28.16	5.06711	3.0013e-05	0.000103153	ko01100//Metabolic pathways;ko00240//Pyrimidine metabolism	-	-	-	gi|170084103|ref|XP_001873275.1|/1.9049e-76/predicted protein [Laccaria bicolor S238N-H82]
GME11481_g	2	65	0.34	11.3	5.05464	0.000119013	0.000367188	ko01100//Metabolic pathways;ko00562//Inositol phosphate metabolism;ko00521//Streptomycin biosynthesis;ko01120//Microbial metabolism in diverse environments;ko01110//Biosynthesis of secondary metabolites	-	GO:0003824//catalytic activity	-	gi|170085311|ref|XP_001873879.1|/0/predicted protein [Laccaria bicolor S238N-H82]
GME5910_g	2	65	0.34	11.3	5.05464	0.000119013	0.000366656	-	-	-	-	-
GME6264_g	8	256	1.34	44.49	5.05318	5.98132e-06	2.27558e-05	-	-	-	-	gi|299746057|ref|XP_001837702.2|/9.22558e-137/hypothetical protein CC1G_06908 [Coprinopsis cinerea okayama7||130]
GME9354_g	41	1277	6.89	221.94	5.00952	1.3789e-13	1.23549e-12	-	-	-	-	gi|170084637|ref|XP_001873542.1|/4.11393e-17/predicted protein [Laccaria bicolor S238N-H82]
GME9071_g	4	124	0.67	21.55	5.00738	4.90594e-05	0.000162823	-	-	-	-	gi|395325040|gb|EJF57469.1|/4.5684e-36/hypothetical protein DICSQDRAFT_69381 [Dichomitus squalens LYAD-421 SS1]
GME7378_g	14	434	2.35	75.43	5.00441	1.76758e-07	8.08485e-07	-	-	-	-	gi|296413844|ref|XP_002836618.1|/5.35718e-112/hypothetical protein [Tuber melanosporum Mel28]
GME6655_g	7	215	1.18	37.37	4.98502	1.04175e-05	3.85969e-05	-	-	-	-	-
GME10994_g	7	205	1.18	35.63	4.91623	1.04175e-05	3.84795e-05	ko01100//Metabolic pathways;ko00500//Starch and sucrose metabolism	-	-	-	gi|170100174|ref|XP_001881305.1|/0/predicted protein [Laccaria bicolor S238N-H82]
GME8706_g	3	86	0.5	14.95	4.90207	7.72612e-05	0.000248187	-	-	GO:0004672//protein kinase activity;GO:0032559	GO:0006464//cellular protein modification process	gi|336373381|gb|EGO01719.1|/0/hypothetical protein SERLA73DRAFT_48914 [Serpula lacrymans var. lacrymans S7.3]
GME3683_g	10	275	1.68	47.79	4.83018	1.90502e-06	7.73562e-06	ko03450//Non-homologous end-joining;ko03440//Homologous recombination	-	-	-	gi|302692378|ref|XP_003035868.1|/9.77282e-57/hypothetical protein SCHCODRAFT_44593 [Schizophyllum commune H4-8]
GME7368_g	17	468	2.86	81.34	4.82988	2.83294e-08	1.40049e-07	-	-	-	-	-
GME7813_g	6	161	1.01	27.98	4.79197	1.78632e-05	6.40618e-05	ko00980//Metabolism of xenobiotics by cytochrome P450	-	-	-	gi|393215311|gb|EJD00802.1|/1.80795e-144/Aldo/keto reductase [Fomitiporia mediterranea MF3/22]
GME3337_g	25	664	4.2	115.4	4.78011	1.9587e-10	1.19133e-09	ko00624//Polycyclic aromatic hydrocarbon degradation;ko01100//Metabolic pathways;ko00627//Aminobenzoate degradation;ko00363//Bisphenol degradation;ko01110//Biosynthesis of secondary metabolites;ko00903//Limonene and pinene degradation;ko00945//Stilbenoid, diarylheptanoid and gingerol biosynthesis;ko01120//Microbial metabolism in diverse environments;ko01100//Metabolic pathways;ko00360//Phenylalan…	-	GO:0016491//oxidoreductase activity;GO:0005506//iron ion binding	GO:0008152//metabolic process	gi|403414158|emb|CCM00858.1|/0/predicted protein [Fibroporia radiculosa]
GME6294_g	16	425	2.69	73.86	4.77912	5.23262e-08	2.51799e-07	-	-	-	-	-
GME617_g	24	630	4.03	109.49	4.76388	3.65748e-10	2.14924e-09	-	-	-	-	-
GME7783_g	9	234	1.51	40.67	4.75134	3.39234e-06	1.34038e-05	ko02020//Two-component system;ko01100//Metabolic pathways;ko00591//Linoleic acid metabolism;ko00051//Fructose and mannose metabolism;ko00362//Benzoate degradation;ko00363//Bisphenol degradation;ko01110//Biosynthesis of secondary metabolites;ko00903//Limonene and pinene degradation;ko00650//Butanoate metabolism;ko00626//Naphthalene degradation;ko00625//Chloroalkane and chloroalkene degradation;ko0…	-	GO:0003824//catalytic activity	GO:0008152//metabolic process	gi|170093992|ref|XP_001878217.1|/1.03129e-127/predicted protein [Laccaria bicolor S238N-H82]
GME4412_g	9	234	1.51	40.67	4.75134	3.39234e-06	1.33914e-05	-	-	-	-	gi|393221594|gb|EJD07079.1|/1.54823e-107/hypothetical protein FOMMEDRAFT_17578 [Fomitiporia mediterranea MF3/22]
GME2003_g	6	152	1.01	26.42	4.7092	1.78632e-05	6.39809e-05	ko01100//Metabolic pathways;ko00860//Porphyrin and chlorophyll metabolism;ko01110//Biosynthesis of secondary metabolites	-	-	-	gi|390603059|gb|EIN12451.1|/7.93651e-105/NAD(P)-binding protein [Punctularia strigosozonata HHB-11173 SS5]
GME4881_g	13	324	2.18	56.31	4.69099	3.22918e-07	1.43457e-06	ko00624//Polycyclic aromatic hydrocarbon degradation;ko01100//Metabolic pathways;ko00627//Aminobenzoate degradation;ko00363//Bisphenol degradation;ko01110//Biosynthesis of secondary metabolites;ko00903//Limonene and pinene degradation;ko00945//Stilbenoid, diarylheptanoid and gingerol biosynthesis;ko01120//Microbial metabolism in diverse environments	-	GO:0016491//oxidoreductase activity;GO:0005506//iron ion binding	-	gi|170109003|ref|XP_001885709.1|/0/predicted protein [Laccaria bicolor S238N-H82]
GME7201_g	8	196	1.34	34.06	4.66777	5.98132e-06	2.27966e-05	ko03440//Homologous recombination	-	-	-	gi|170108150|ref|XP_001885284.1|/2.15527e-53/predicted protein [Laccaria bicolor S238N-H82]
GME9245_g	3	73	0.5	12.69	4.66562	7.72612e-05	0.000247906	-	-	-	-	gi|170097037|ref|XP_001879738.1|/5.90746e-27/predicted protein [Laccaria bicolor S238N-H82]
GME9507_g	5	122	0.84	21.2	4.65753	3.0013e-05	0.000102903	ko05200//Pathways in cancer;ko04011//MAPK signaling pathway - yeast;ko05216//Thyroid cancer;ko03013//RNA transport	-	-	-	gi|169845181|ref|XP_001829310.1|/8.51284e-133/hypothetical protein CC1G_00489 [Coprinopsis cinerea okayama7||130]
GME9015_g	3	72	0.5	12.51	4.64501	7.72612e-05	0.000248281	ko00620//Pyruvate metabolism;ko01100//Metabolic pathways;ko00500//Starch and sucrose metabolism	-	-	-	gi|392568364|gb|EIW61538.1|/1.56619e-77/hypothetical protein TRAVEDRAFT_117935 [Trametes versicolor FP-101664 SS1]
GME10057_g	2	48	0.34	8.34	4.61644	0.000119013	0.000366922	ko05152//Tuberculosis;ko04612//Antigen processing and presentation	GO:0043231//intracellular membrane-bounded organelle	GO:0001071//nucleic acid binding transcription factor activity	GO:0006351//transcription, DNA-dependent	gi|336371865|gb|EGO00205.1|/6.33874e-34/hypothetical protein SERLA73DRAFT_72938 [Serpula lacrymans var. lacrymans S7.3]
GME5492_g	5	117	0.84	20.33	4.59708	3.0013e-05	0.000102945	-	-	-	-	gi|170087316|ref|XP_001874881.1|/3.3531e-90/predicted protein [Laccaria bicolor S238N-H82]
GME5998_g	6	140	1.01	24.33	4.59031	1.78632e-05	6.39539e-05	-	-	-	-	-
GME8173_g	7	154	1.18	26.76	4.50322	1.04175e-05	3.85801e-05	ko00624//Polycyclic aromatic hydrocarbon degradation;ko01100//Metabolic pathways;ko00627//Aminobenzoate degradation;ko00363//Bisphenol degradation;ko01110//Biosynthesis of secondary metabolites;ko00903//Limonene and pinene degradation;ko00945//Stilbenoid, diarylheptanoid and gingerol biosynthesis;ko01120//Microbial metabolism in diverse environments;ko01100//Metabolic pathways;ko00627//Aminobenzo…	-	-	-	gi|336383561|gb|EGO24710.1|/1.92905e-141/hypothetical protein SERLADRAFT_349023 [Serpula lacrymans var. lacrymans S7.9]
GME25_g	2	44	0.34	7.65	4.49185	0.000119013	0.000367055	-	-	-	-	-
GME8223_g	15	325	2.52	56.48	4.48624	9.6347e-08	4.50874e-07	-	-	-	-	gi|336365481|gb|EGN93831.1|/8.3176e-99/hypothetical protein SERLA73DRAFT_78206 [Serpula lacrymans var. lacrymans S7.3]
GME1412_g	71	1524	11.93	264.87	4.47262	0	0	ko00624//Polycyclic aromatic hydrocarbon degradation;ko01100//Metabolic pathways;ko00627//Aminobenzoate degradation;ko00363//Bisphenol degradation;ko01110//Biosynthesis of secondary metabolites;ko00903//Limonene and pinene degradation;ko00945//Stilbenoid, diarylheptanoid and gingerol biosynthesis;ko01120//Microbial metabolism in diverse environments;ko01100//Metabolic pathways;ko00360//Phenylalan…	-	-	-	gi|392560337|gb|EIW53520.1|/4.48948e-117/cytochrome P450 [Trametes versicolor FP-101664 SS1]
GME5213_g	19	401	3.19	69.69	4.44932	8.23986e-09	4.29048e-08	-	-	-	-	gi|170103482|ref|XP_001882956.1|/1.09146e-73/predicted protein [Laccaria bicolor S238N-H82]
GME10079_g	23	479	3.86	83.25	4.43078	6.82968e-10	3.8975e-09	ko03460//Fanconi anemia pathway;ko04146//Peroxisome	-	-	GO:0006810//transport	gi|169848347|ref|XP_001830881.1|/0/hypothetical protein CC1G_02332 [Coprinopsis cinerea okayama7||130]
GME5979_g	7	145	1.18	25.2	4.41656	1.04175e-05	3.84461e-05	-	-	-	-	gi|393214723|gb|EJD00216.1|/1.09574e-74/hypothetical protein FOMMEDRAFT_22670 [Fomitiporia mediterranea MF3/22]
GME3995_g	458	9398	76.96	1633.34	4.40757	1.58118e-12	1.15307e-11	-	-	-	-	-
GME7338_g	199	4077	33.44	708.57	4.40526	2.4647e-14	2.50986e-13	-	-	-	-	gi|170087550|ref|XP_001874998.1|/8.53277e-70/predicted protein [Laccaria bicolor S238N-H82]
GME9305_g	6	122	1.01	21.2	4.39164	1.78632e-05	6.3927e-05	-	-	GO:0000166//nucleotide binding;GO:0003824//catalytic activity	-	gi|393219955|gb|EJD05441.1|/2.12959e-82/flavo protein WrbA [Fomitiporia mediterranea MF3/22]
GME2953_g	2	41	0.34	7.13	4.3903	0.000119014	0.000365994	-	-	GO:0003824//catalytic activity	-	gi|170115502|ref|XP_001888945.1|/1.57849e-116/predicted protein [Laccaria bicolor S238N-H82]
GME2751_g	22	443	3.7	76.99	4.37907	1.27497e-09	7.11823e-09	-	GO:0031224//intrinsic to membrane	GO:0005275//amine transmembrane transporter activity	GO:0006865//amino acid transport	gi|170111226|ref|XP_001886817.1|/0/APC amino acid permease [Laccaria bicolor S238N-H82]
GME6145_g	113	2186	18.99	379.92	4.32238	2.04058e-13	1.71623e-12	ko01100//Metabolic pathways;ko00624//Polycyclic aromatic hydrocarbon degradation;ko00340//Histidine metabolism;ko00623//Toluene degradation;ko00627//Aminobenzoate degradation;ko00361//Chlorocyclohexane and chlorobenzene degradation;ko00363//Bisphenol degradation;ko00960//Tropane, piperidine and pyridine alkaloid biosynthesis;ko00903//Limonene and pinene degradation;ko00626//Naphthalene degradatio…	-	-	-	gi|295016067|emb|CBE71381.1|/1.68748e-167/esterase 1 [Pleurotus sapidus]
GME9326_g	15	278	2.52	48.32	4.26112	9.6347e-08	4.50379e-07	ko02020//Two-component system;ko01100//Metabolic pathways;ko00591//Linoleic acid metabolism;ko00051//Fructose and mannose metabolism;ko00362//Benzoate degradation;ko00363//Bisphenol degradation;ko01110//Biosynthesis of secondary metabolites;ko00903//Limonene and pinene degradation;ko00650//Butanoate metabolism;ko00626//Naphthalene degradation;ko00625//Chloroalkane and chloroalkene degradation;ko0…	GO:0031224//intrinsic to membrane	GO:0015075//ion transmembrane transporter activity;GO:0003824//catalytic activity	GO:0030001//metal ion transport;GO:0008152//metabolic process	gi|169845605|ref|XP_001829522.1|/2.17676e-167/voltage-gated potassium channel beta-2 subunit [Coprinopsis cinerea okayama7||130]
GME11003_g	3	55	0.5	9.56	4.25701	7.72612e-05	0.000248469	-	-	-	-	gi|299747069|ref|XP_001839332.2|/9.11137e-08/hypothetical protein CC1G_08199 [Coprinopsis cinerea okayama7||130]
GME6083_g	8	141	1.34	24.51	4.19307	5.98132e-06	2.28068e-05	-	-	-	-	gi|170097423|ref|XP_001879931.1|/3.86389e-26/predicted protein [Laccaria bicolor S238N-H82]
GME3659_g	7	121	1.18	21.03	4.15559	1.04175e-05	3.85465e-05	-	-	-	-	gi|238582519|ref|XP_002389957.1|/1.81344e-40/hypothetical protein MPER_10847 [Moniliophthora perniciosa FA553]
GME4521_g	41	697	6.89	121.14	4.13603	1.3789e-13	1.23418e-12	-	-	-	GO:0015931//nucleobase-containing compound transport	gi|392564344|gb|EIW57522.1|/0/cytosine-purine permease [Trametes versicolor FP-101664 SS1]
GME2923_g	138	2335	23.19	405.81	4.12923	1.5854e-13	1.39119e-12	ko00040//Pentose and glucuronate interconversions;ko03430//Mismatch repair;ko01100//Metabolic pathways;ko03440//Homologous recombination;ko01040//Biosynthesis of unsaturated fatty acids;ko00061//Fatty acid biosynthesis;ko01110//Biosynthesis of secondary metabolites;ko00640//Propanoate metabolism;ko00620//Pyruvate metabolism;ko03410//Base excision repair;ko01120//Microbial metabolism in diverse en…	-	GO:0003824//catalytic activity	GO:0008152//metabolic process	gi|170111244|ref|XP_001886826.1|/1.9799e-91/predicted protein [Laccaria bicolor S238N-H82]
GME5791_g	67	1110	11.26	192.91	4.09865	0	0	-	-	-	-	gi|299752216|ref|XP_001830778.2|/3.4224e-47/hypothetical protein CC1G_03315 [Coprinopsis cinerea okayama7||130]
GME1294_g	35	578	5.88	100.45	4.09452	5.59996e-13	4.27437e-12	ko00910//Nitrogen metabolism	-	-	-	gi|392594384|gb|EIW83708.1|/1.1864e-44/Cyanase [Coniophora puteana RWD-64-598 SS2]
GME3116_g	4	65	0.67	11.3	4.07602	4.90594e-05	0.000162506	ko03320//PPAR signaling pathway;ko01040//Biosynthesis of unsaturated fatty acids	GO:0016020//membrane	GO:0016717//oxidoreductase activity, acting on paired donors, with oxidation of a pair of donors resulting in the reduction of molecular oxygen to two molecules of water;GO:0005506//iron ion binding	GO:0006629//lipid metabolic process	gi|170096722|ref|XP_001879581.1|/3.77869e-151/delta 9-fatty acid desaturase protein [Laccaria bicolor S238N-H82]
GME10938_g	4	65	0.67	11.3	4.07602	4.90594e-05	0.000162442	ko00910//Nitrogen metabolism;ko01120//Microbial metabolism in diverse environments	-	GO:0046872//metal ion binding;GO:0016491//oxidoreductase activity;GO:0051536//iron-sulfur cluster binding;GO:0050662//coenzyme binding	GO:0008152//metabolic process	gi|299746726|ref|XP_001840498.2|/0/nitrite reductase [Coprinopsis cinerea okayama7||130]
GME1353_g	6	98	1.01	17.03	4.07565	1.78632e-05	6.40078e-05	ko01100//Metabolic pathways;ko00520//Amino sugar and nucleotide sugar metabolism;ko00500//Starch and sucrose metabolism;ko01110//Biosynthesis of secondary metabolites	-	-	-	gi|390601737|gb|EIN11131.1|/1.3493e-105/hypothetical protein PUNSTDRAFT_142953 [Punctularia strigosozonata HHB-11173 SS5]
GME918_g	5	81	0.84	14.08	4.06711	3.0013e-05	0.000103111	ko04111//Cell cycle - yeast	-	-	-	gi|170092411|ref|XP_001877427.1|/1.82185e-80/predicted protein [Laccaria bicolor S238N-H82]
GME7539_g	13	209	2.18	36.32	4.05836	3.22918e-07	1.43607e-06	ko01100//Metabolic pathways;ko00500//Starch and sucrose metabolism	-	GO:0003824//catalytic activity	-	gi|302687152|ref|XP_003033256.1|/2.36484e-140/glycoside hydrolase family 5 protein [Schizophyllum commune H4-8]
GME10930_g	104	1668	17.48	289.89	4.05173	0	0	-	-	-	-	gi|389749226|gb|EIM90403.1|/1.02594e-149/hypothetical protein STEHIDRAFT_119409 [Stereum hirsutum FP-91666 SS1]
GME11316_g	14	222	2.35	38.58	4.03712	1.76758e-07	8.09356e-07	-	GO:0043231//intracellular membrane-bounded organelle	GO:0003676//nucleic acid binding;GO:0016616//oxidoreductase activity, acting on the CH-OH group of donors, NAD or NADP as acceptor	GO:0008652//cellular amino acid biosynthetic process;GO:0006396//RNA processing	gi|170083917|ref|XP_001873182.1|/3.28269e-167/predicted protein [Laccaria bicolor S238N-H82]
GME1183_g	63	983	10.59	170.84	4.01187	0	0	-	-	-	-	-
GME6932_g	9	140	1.51	24.33	4.01012	3.39234e-06	1.3379e-05	-	-	-	-	gi|393229702|gb|EJD37320.1|/4.90153e-23/hypothetical protein AURDEDRAFT_173594 [Auricularia delicata TFB-10046 SS5]
GME5649_g	19	294	3.19	51.1	4.00169	8.23986e-09	4.30101e-08	-	-	-	-	-
GME7602_g	3	46	0.5	7.99	3.9982	7.72612e-05	0.000248375	ko00930//Caprolactam degradation;ko01120//Microbial metabolism in diverse environments	-	GO:0016491//oxidoreductase activity	-	gi|170093614|ref|XP_001878028.1|/1.04632e-150/predicted protein [Laccaria bicolor S238N-H82]
GME3672_g	3	46	0.5	7.99	3.9982	7.72612e-05	0.000248	-	-	-	-	gi|390595957|gb|EIN05360.1|/3.9572e-122/acetyl-CoA synthetase-like protein [Punctularia strigosozonata HHB-11173 SS5]
GME7283_g	4	61	0.67	10.6	3.98376	4.90594e-05	0.000162632	ko00624//Polycyclic aromatic hydrocarbon degradation;ko01100//Metabolic pathways;ko00627//Aminobenzoate degradation;ko00363//Bisphenol degradation;ko01110//Biosynthesis of secondary metabolites;ko00903//Limonene and pinene degradation;ko00945//Stilbenoid, diarylheptanoid and gingerol biosynthesis;ko01120//Microbial metabolism in diverse environments;ko01100//Metabolic pathways;ko00360//Phenylalan…	-	GO:0016491//oxidoreductase activity;GO:0005506//iron ion binding	-	gi|170103023|ref|XP_001882727.1|/3.46386e-170/predicted protein [Laccaria bicolor S238N-H82]
GME5546_g	4	60	0.67	10.43	3.96043	4.90594e-05	0.000162379	ko05200//Pathways in cancer;ko04011//MAPK signaling pathway - yeast;ko05216//Thyroid cancer;ko03013//RNA transport	-	-	-	gi|85074861|ref|XP_965798.1|/2.63548e-44/hypothetical protein NCU00658 [Neurospora crassa OR74A]
GME1957_g	88	1313	14.79	228.19	3.94754	2.22044e-16	2.56876e-15	ko01100//Metabolic pathways;ko00400//Phenylalanine, tyrosine and tryptophan biosynthesis;ko01110//Biosynthesis of secondary metabolites	-	GO:0016866//intramolecular transferase activity	GO:0008652//cellular amino acid biosynthetic process;GO:0043648//dicarboxylic acid metabolic process	gi|336369875|gb|EGN98216.1|/2.11869e-130/hypothetical protein SERLA73DRAFT_91475 [Serpula lacrymans var. lacrymans S7.3]
GME10452_g	329	4889	55.29	849.69	3.94185	0	0	-	-	-	-	-
GME5631_g	7	104	1.18	18.07	3.93674	1.04175e-05	3.86305e-05	-	-	-	-	gi|336377807|gb|EGO18967.1|/1.28296e-30/hypothetical protein SERLADRAFT_443513 [Serpula lacrymans var. lacrymans S7.9]
GME9979_g	142	2087	23.86	362.71	3.92615	2.64456e-13	2.16218e-12	-	-	-	-	gi|299751757|ref|XP_002911683.1|/1.19024e-32/hypothetical protein CC1G_14216 [Coprinopsis cinerea okayama7||130]
GME6287_g	9	132	1.51	22.94	3.92524	3.39234e-06	1.34101e-05	-	-	-	-	gi|115397511|ref|XP_001214347.1|/0/predicted protein [Aspergillus terreus NIH2624]
GME3136_g	7	103	1.18	17.9	3.9231	1.04175e-05	3.84628e-05	-	GO:0031224//intrinsic to membrane	-	GO:0030001//metal ion transport	gi|170116443|ref|XP_001889412.1|/0/urea transporter [Laccaria bicolor S238N-H82]
GME1978_g	11	161	1.85	27.98	3.9188	1.06112e-06	4.46889e-06	ko05016//Huntington's disease;ko04146//Peroxisome;ko05020//Prion diseases;ko05014//Amyotrophic lateral sclerosis (ALS)	-	-	-	gi|389744796|gb|EIM85978.1|/5.06931e-53/hypothetical protein STEHIDRAFT_98286 [Stereum hirsutum FP-91666 SS1]
GME6519_g	15	219	2.52	38.06	3.91678	9.6347e-08	4.51123e-07	-	-	-	-	gi|389741711|gb|EIM82899.1|/4.12903e-41/hypothetical protein STEHIDRAFT_171045 [Stereum hirsutum FP-91666 SS1]
GME2838_g	10	145	1.68	25.2	3.90689	1.90502e-06	7.73193e-06	-	-	-	-	gi|18033194|gb|AAL57035.1|/7.82157e-33/PriA [Pleurotus ostreatus]
GME5391_g	121	1719	20.33	298.76	3.8773	2.22044e-16	2.64802e-15	-	-	-	GO:0050896//response to stimulus	gi|169852774|ref|XP_001833069.1|/6.78042e-28/hypothetical protein CC1G_01131 [Coprinopsis cinerea okayama7||130]
GME7183_g	19	269	3.19	46.75	3.87334	8.23986e-09	4.29311e-08	-	-	-	-	-
GME3303_g	28	397	4.71	69	3.8728	3.03432e-11	1.95609e-10	-	-	-	-	gi|63079023|gb|AAY29572.1|/8.35704e-134/volvatoxin A1 precursor [Volvariella volvacea]
GME2874_g	7	99	1.18	17.21	3.86639	1.04175e-05	3.85633e-05	-	-	-	-	gi|170095447|ref|XP_001878944.1|/3.5225e-104/predicted protein [Laccaria bicolor S238N-H82]
GME3486_g	71	968	11.93	168.24	3.81785	0	0	ko02020//Two-component system;ko01100//Metabolic pathways;ko00591//Linoleic acid metabolism;ko00051//Fructose and mannose metabolism;ko00362//Benzoate degradation;ko00363//Bisphenol degradation;ko01110//Biosynthesis of secondary metabolites;ko00903//Limonene and pinene degradation;ko00650//Butanoate metabolism;ko00626//Naphthalene degradation;ko00625//Chloroalkane and chloroalkene degradation;ko0…	-	-	-	gi|170088881|ref|XP_001875663.1|/5.69586e-137/predicted protein [Laccaria bicolor S238N-H82]
GME10424_g	7	94	1.18	16.34	3.79155	1.04175e-05	3.85297e-05	-	-	-	-	gi|170116144|ref|XP_001889264.1|/1.19356e-149/predicted protein [Laccaria bicolor S238N-H82]
GME4095_g	4	52	0.67	9.04	3.75409	4.90594e-05	0.000162886	-	-	-	-	gi|393244468|gb|EJD51980.1|/1.24489e-55/hypothetical protein AURDEDRAFT_181547 [Auricularia delicata TFB-10046 SS5]
GME3945_g	5	64	0.84	11.12	3.72662	3.0013e-05	0.000103028	-	-	GO:0016491//oxidoreductase activity;GO:0005506//iron ion binding	-	gi|169855683|ref|XP_001834508.1|/0/cytochrome P450 monooxygenase pc-1 [Coprinopsis cinerea okayama7||130]
GME11500_g	6	75	1.01	13.03	3.68941	1.78632e-05	6.40348e-05	ko00230//Purine metabolism;ko04113//Meiosis - yeast	-	-	-	gi|170085319|ref|XP_001873883.1|/0/predicted protein [Laccaria bicolor S238N-H82]
GME7088_g	7	87	1.18	15.12	3.6796	1.04175e-05	3.8513e-05	ko01100//Metabolic pathways;ko00740//Riboflavin metabolism	-	GO:0016740//transferase activity	-	gi|336372672|gb|EGO01011.1|/1.26362e-80/hypothetical protein SERLA73DRAFT_179038 [Serpula lacrymans var. lacrymans S7.3]
GME8598_g	49	596	8.23	103.58	3.65371	3.73034e-14	3.75374e-13	ko05215//Prostate cancer;ko05200//Pathways in cancer;ko00480//Glutathione metabolism;ko00980//Metabolism of xenobiotics by cytochrome P450;ko00982//Drug metabolism - cytochrome P450	-	GO:0003824//catalytic activity	-	gi|170091744|ref|XP_001877094.1|/3.22546e-89/predicted protein [Laccaria bicolor S238N-H82]
GME4487_g	7	85	1.18	14.77	3.64581	1.04175e-05	3.84962e-05	-	-	-	-	-
GME534_g	4	48	0.67	8.34	3.63781	4.90594e-05	0.000162759	-	-	-	-	gi|392590027|gb|EIW79357.1|/9.48874e-15/hypothetical protein CONPUDRAFT_138491 [Coniophora puteana RWD-64-598 SS2]
GME7033_g	8	96	1.34	16.68	3.63781	5.98132e-06	2.27762e-05	-	-	GO:0046914//transition metal ion binding;GO:0003677//DNA binding;GO:0001071//nucleic acid binding transcription factor activity	GO:0006351//transcription, DNA-dependent	gi|170086289|ref|XP_001874368.1|/1.25559e-25/predicted protein [Laccaria bicolor S238N-H82]
GME8930_g	5	60	0.84	10.43	3.63421	3.0013e-05	0.00010307	-	-	-	-	gi|299741324|ref|XP_002910429.1|/2.21216e-115/acylaminoacyl-peptidase [Coprinopsis cinerea okayama7||130]
GME6435_g	12	143	2.02	24.85	3.62082	5.8705e-07	2.53385e-06	-	-	-	-	gi|170087550|ref|XP_001874998.1|/1.12953e-56/predicted protein [Laccaria bicolor S238N-H82]
GME383_g	10	118	1.68	20.51	3.60979	1.90502e-06	7.74672e-06	ko04011//MAPK signaling pathway - yeast	GO:0043231//intracellular membrane-bounded organelle	GO:0001071//nucleic acid binding transcription factor activity	GO:0006351//transcription, DNA-dependent	gi|170100987|ref|XP_001881711.1|/2.40155e-63/predicted protein [Laccaria bicolor S238N-H82]
GME5928_g	32	366	5.38	63.61	3.56358	2.77e-12	1.9677e-11	ko01100//Metabolic pathways;ko00230//Purine metabolism;ko00983//Drug metabolism - other enzymes;ko00240//Pyrimidine metabolism	-	GO:0003824//catalytic activity	-	gi|170091458|ref|XP_001876951.1|/1.24562e-76/predicted protein [Laccaria bicolor S238N-H82]
GME3835_g	19	216	3.19	37.54	3.5568	8.23986e-09	4.29574e-08	-	-	GO:0003676//nucleic acid binding;GO:0001071//nucleic acid binding transcription factor activity	GO:0006351//transcription, DNA-dependent	gi|299750383|ref|XP_001836714.2|/6.23762e-88/hypothetical protein CC1G_08099 [Coprinopsis cinerea okayama7||130]
GME8214_g	4	44	0.67	7.65	3.51323	4.90598e-05	0.000162317	-	-	-	-	gi|170093261|ref|XP_001877852.1|/1.421e-138/predicted protein [Laccaria bicolor S238N-H82]
GME2089_g	117	1290	19.66	224.2	3.51145	1.31894e-13	1.19182e-12	ko00040//Pentose and glucuronate interconversions	-	GO:0005488//binding;GO:0003824//catalytic activity	GO:0008152//metabolic process	gi|336370111|gb|EGN98452.1|/1.56414e-101/hypothetical protein SERLA73DRAFT_183468 [Serpula lacrymans var. lacrymans S7.3]
GME10418_g	23	252	3.86	43.8	3.50426	6.82968e-10	3.89489e-09	-	-	-	-	gi|299747069|ref|XP_001839332.2|/9.66474e-18/hypothetical protein CC1G_08199 [Coprinopsis cinerea okayama7||130]
GME1016_g	26	282	4.37	49.01	3.48737	1.05008e-10	6.49371e-10	ko00624//Polycyclic aromatic hydrocarbon degradation;ko01100//Metabolic pathways;ko00627//Aminobenzoate degradation;ko00363//Bisphenol degradation;ko01110//Biosynthesis of secondary metabolites;ko00903//Limonene and pinene degradation;ko00945//Stilbenoid, diarylheptanoid and gingerol biosynthesis;ko01120//Microbial metabolism in diverse environments;ko00100//Steroid biosynthesis;ko01100//Metaboli…	-	GO:0016491//oxidoreductase activity;GO:0005506//iron ion binding	GO:0008152//metabolic process	gi|170092993|ref|XP_001877718.1|/2.30954e-155/predicted protein [Laccaria bicolor S238N-H82]
GME636_g	123	1332	20.67	231.5	3.4854	0	0	ko04011//MAPK signaling pathway - yeast	-	-	-	gi|299751964|ref|XP_001830610.2|/1.95087e-18/hypothetical protein CC1G_06876 [Coprinopsis cinerea okayama7||130]
GME6448_g	90	967	15.12	168.06	3.47445	0	0	ko00260//Glycine, serine and threonine metabolism	-	GO:0016491//oxidoreductase activity;GO:0050662//coenzyme binding	GO:0044281//small molecule metabolic process	gi|336363523|gb|EGN91908.1|/0/hypothetical protein SERLA73DRAFT_117989 [Serpula lacrymans var. lacrymans S7.3]
GME1248_g	43	461	7.23	80.12	3.47009	1.06137e-13	9.83101e-13	ko00260//Glycine, serine and threonine metabolism	-	-	-	gi|170106181|ref|XP_001884302.1|/1.64951e-141/predicted protein [Laccaria bicolor S238N-H82]
GME11722_g	25	264	4.2	45.88	3.4494	1.9587e-10	1.19304e-09	-	-	-	-	gi|169844410|ref|XP_001828926.1|/1.41729e-90/hypothetical protein CC1G_03720 [Coprinopsis cinerea okayama7||130]
GME1429_g	34	358	5.71	62.22	3.44582	9.19264e-13	6.88072e-12	-	-	-	-	gi|154273979|ref|XP_001537841.1|/7.41707e-07/predicted protein [Ajellomyces capsulatus NAm1]
GME2809_g	4	42	0.67	7.3	3.44566	4.90608e-05	0.000162257	-	-	-	-	gi|336378442|gb|EGO19600.1|/7.01975e-60/hypothetical protein SERLADRAFT_402103 [Serpula lacrymans var. lacrymans S7.9]
GME6008_g	10	105	1.68	18.25	3.44136	1.90502e-06	7.76156e-06	ko04020//Calcium signaling pathway;ko01100//Metabolic pathways;ko04070//Phosphatidylinositol signaling system;ko00562//Inositol phosphate metabolism	-	GO:0004629//phospholipase C activity	GO:0007165//signal transduction	gi|299746626|ref|XP_001840579.2|/8.94536e-155/1-phosphatidylinositol-4,5-bisphosphate phosphodiesterase 1 [Coprinopsis cinerea okayama7||130]
GME9171_g	10	105	1.68	18.25	3.44136	1.90502e-06	7.75413e-06	-	-	-	-	gi|169843086|ref|XP_001828274.1|/2.60291e-161/hypothetical protein CC1G_02855 [Coprinopsis cinerea okayama7||130]
GME7589_g	361	3759	60.66	653.3	3.42893	0	0	-	-	-	-	-
GME4640_g	8	82	1.34	14.25	3.41066	5.98132e-06	2.27864e-05	-	-	-	-	gi|238584129|ref|XP_002390464.1|/1.53784e-23/hypothetical protein MPER_10249 [Moniliophthora perniciosa FA553]
GME6485_g	13	133	2.18	23.11	3.40612	3.22918e-07	1.43758e-06	ko00624//Polycyclic aromatic hydrocarbon degradation;ko01100//Metabolic pathways;ko00627//Aminobenzoate degradation;ko00363//Bisphenol degradation;ko01110//Biosynthesis of secondary metabolites;ko00903//Limonene and pinene degradation;ko00945//Stilbenoid, diarylheptanoid and gingerol biosynthesis;ko01120//Microbial metabolism in diverse environments;ko01100//Metabolic pathways;ko00360//Phenylalan…	-	GO:0046872//metal ion binding	-	gi|170103023|ref|XP_001882727.1|/5.64076e-133/predicted protein [Laccaria bicolor S238N-H82]
GME6837_g	18	182	3.02	31.63	3.38867	1.52961e-08	7.76959e-08	-	-	-	-	gi|170092663|ref|XP_001877553.1|/6.09313e-62/predicted protein [Laccaria bicolor S238N-H82]
GME10428_g	57	577	9.58	100.28	3.38786	5.52892e-14	5.43496e-13	-	-	-	-	gi|170100196|ref|XP_001881316.1|/3.29374e-147/predicted protein [Laccaria bicolor S238N-H82]
GME3919_g	10	100	1.68	17.38	3.37089	1.90502e-06	7.76529e-06	-	-	-	-	gi|336364231|gb|EGN92592.1|/9.87657e-96/hypothetical protein SERLA73DRAFT_79412 [Serpula lacrymans var. lacrymans S7.3]
GME9343_g	16	160	2.69	27.81	3.36993	5.23262e-08	2.52228e-07	-	-	-	-	gi|170109992|ref|XP_001886202.1|/1.09418e-25/predicted protein [Laccaria bicolor S238N-H82]
GME2109_g	6	60	1.01	10.43	3.36831	1.78632e-05	6.39001e-05	-	-	-	-	gi|169858091|ref|XP_001835692.1|/2.80584e-121/DUF1714 domain-containing protein [Coprinopsis cinerea okayama7||130]
GME2396_g	7	70	1.18	12.17	3.36647	1.04175e-05	3.84294e-05	-	-	-	-	gi|361129211|gb|EHL01123.1|/8.39466e-155/hypothetical protein M7I_2814 [Glarea lozoyensis 74030]
GME9212_g	19	187	3.19	32.5	3.34881	8.23986e-09	4.29838e-08	ko05215//Prostate cancer;ko05200//Pathways in cancer;ko00480//Glutathione metabolism;ko00980//Metabolism of xenobiotics by cytochrome P450;ko00982//Drug metabolism - cytochrome P450	-	GO:0003824//catalytic activity	-	gi|169863935|ref|XP_001838582.1|/6.76296e-64/glutathione S-transferase [Coprinopsis cinerea okayama7||130]
GME2779_g	12	118	2.02	20.51	3.3439	5.8705e-07	2.53901e-06	-	-	-	-	gi|395330202|gb|EJF62586.1|/6.3468e-65/terpenoid synthase [Dichomitus squalens LYAD-421 SS1]
GME10343_g	5	49	0.84	8.52	3.34239	3.00132e-05	0.000102863	-	-	-	-	gi|170115339|ref|XP_001888864.1|/2.05562e-80/predicted protein [Laccaria bicolor S238N-H82]
GME554_g	25	239	4.2	41.54	3.30604	1.9587e-10	1.19219e-09	-	-	-	-	-
GME5575_g	77	735	12.94	127.74	3.3033	0	0	-	GO:0031224//intrinsic to membrane	GO:0005275//amine transmembrane transporter activity	GO:0006865//amino acid transport	gi|299753491|ref|XP_001833309.2|/0/dicarboxylic amino acid permease [Coprinopsis cinerea okayama7||130]
GME4746_g	10	95	1.68	16.51	3.29681	1.90502e-06	7.75785e-06	ko04111//Cell cycle - yeast	-	-	-	gi|392585201|gb|EIW74541.1|/8.30502e-28/hypothetical protein CONPUDRAFT_85725 [Coniophora puteana RWD-64-598 SS2]
GME894_g	10	95	1.68	16.51	3.29681	1.90502e-06	7.73931e-06	ko04976//Bile secretion;ko00980//Metabolism of xenobiotics by cytochrome P450	-	GO:0016803	-	gi|299751159|ref|XP_001830097.2|/1.5508e-135/epoxide hydrolase domain-containing protein [Coprinopsis cinerea okayama7||130]
GME9719_g	270	2565	45.37	445.79	3.29655	4.23662e-13	3.31407e-12	ko01100//Metabolic pathways;ko00564//Glycerophospholipid metabolism;ko00565//Ether lipid metabolism	-	GO:0003824//catalytic activity	GO:0008152//metabolic process	gi|170085529|ref|XP_001873988.1|/6.22872e-102/oxidoreductase [Laccaria bicolor S238N-H82]
GME7341_g	226	2139	37.98	371.75	3.29102	2.0206e-14	2.08004e-13	-	-	-	-	gi|170112350|ref|XP_001887377.1|/3.49227e-66/predicted protein [Laccaria bicolor S238N-H82]
GME11390_g	102	965	17.14	167.71	3.29053	0	0	ko04910//Insulin signaling pathway;ko04150//mTOR signaling pathway;ko03013//RNA transport	GO:0044424//intracellular part	GO:0008135//translation factor activity, nucleic acid binding	GO:0006412//translation	gi|242213217|ref|XP_002472438.1|/2.31309e-121/eukaryotic translation initiation factor 4E class I [Postia placenta Mad-698-R]
GME11576_g	12	110	2.02	19.12	3.24266	5.8705e-07	2.53772e-06	-	-	-	-	gi|170086063|ref|XP_001874255.1|/1.56012e-89/predicted protein [Laccaria bicolor S238N-H82]
GME28_g	9	81	1.51	14.08	3.22103	3.39234e-06	1.33976e-05	-	-	-	-	gi|83776425|dbj|BAE66544.1|/2.29245e-08/unnamed protein product [Aspergillus oryzae RIB40]
GME11539_g	6	54	1.01	9.39	3.21677	1.78632e-05	6.38734e-05	ko01100//Metabolic pathways;ko04122//Sulfur relay system;ko00270//Cysteine and methionine metabolism	-	-	-	gi|170084869|ref|XP_001873658.1|/3.59238e-96/predicted protein [Laccaria bicolor S238N-H82]
GME6588_g	11	98	1.85	17.03	3.20248	1.06112e-06	4.46447e-06	-	-	-	-	gi|299748591|ref|XP_001839248.2|/2.4437e-41/hypothetical protein CC1G_12139 [Coprinopsis cinerea okayama7||130]
GME5606_g	96	847	16.13	147.21	3.19006	0	0	-	-	-	-	gi|302690372|ref|XP_003034865.1|/7.45246e-24/hypothetical protein SCHCODRAFT_105073 [Schizophyllum commune H4-8]
GME1610_g	8	70	1.34	12.17	3.18302	5.98132e-06	2.2766e-05	ko00052//Galactose metabolism	-	GO:0003824//catalytic activity	GO:0008152//metabolic process	gi|390598913|gb|EIN08310.1|/1.44354e-154/enolase C-terminal domain-like protein [Punctularia strigosozonata HHB-11173 SS5]
GME11151_g	38	332	6.39	57.7	3.17468	1.90292e-13	1.61644e-12	ko04976//Bile secretion;ko00910//Nitrogen metabolism;ko04972//Pancreatic secretion;ko04971//Gastric acid secretion;ko04966//Collecting duct acid secretion;ko04964//Proximal tubule bicarbonate reclamation;ko00910//Nitrogen metabolism	-	-	-	gi|169851208|ref|XP_001832295.1|/4.03312e-97/carbonic anhydrase [Coprinopsis cinerea okayama7||130]
GME1904_g	95	826	15.96	143.56	3.16912	0	0	-	-	GO:0003824//catalytic activity	GO:0019725//cellular homeostasis	gi|170089117|ref|XP_001875781.1|/2.05423e-60/peroxiredoxin Q [Laccaria bicolor S238N-H82]
GME6657_g	47	408	7.9	70.91	3.16606	0	0	-	-	-	GO:0006810//transport	gi|169868447|ref|XP_001840796.1|/3.99344e-176/carboxylic acid transporter [Coprinopsis cinerea okayama7||130]
GME8683_g	32	274	5.38	47.62	3.14589	2.77e-12	1.96934e-11	-	-	-	-	gi|336373442|gb|EGO01780.1|/1.86722e-74/hypothetical protein SERLA73DRAFT_85661 [Serpula lacrymans var. lacrymans S7.3]
GME11807_g	8	68	1.34	11.82	3.14093	5.98132e-06	2.27456e-05	-	-	-	-	gi|170110600|ref|XP_001886505.1|/3.88984e-92/predicted protein [Laccaria bicolor S238N-H82]
GME1443_g	105	893	17.64	155.2	3.13721	0	0	ko01100//Metabolic pathways;ko00030//Pentose phosphate pathway;ko00511//Other glycan degradation;ko01120//Microbial metabolism in diverse environments;ko01110//Biosynthesis of secondary metabolites	-	-	-	gi|392571497|gb|EIW64669.1|/4.90439e-73/aldolase [Trametes versicolor FP-101664 SS1]
GME11636_g	48	407	8.07	70.74	3.13189	1.01474e-13	9.49215e-13	-	-	-	-	gi|390604005|gb|EIN13396.1|/1.08096e-125/Clavaminate synthase-like protein [Punctularia strigosozonata HHB-11173 SS5]
GME90_g	5	42	0.84	7.3	3.11944	3.00202e-05	0.000102845	-	-	-	-	-
GME8845_g	11	92	1.85	15.99	3.11157	1.06112e-06	4.46005e-06	-	-	-	-	gi|392593149|gb|EIW82475.1|/2.93627e-49/hypothetical protein CONPUDRAFT_136968 [Coniophora puteana RWD-64-598 SS2]
GME6699_g	9	75	1.51	13.03	3.10922	3.39234e-06	1.33852e-05	ko01100//Metabolic pathways;ko00624//Polycyclic aromatic hydrocarbon degradation;ko00626//Naphthalene degradation;ko00621//Dioxin degradation;ko01120//Microbial metabolism in diverse environments	-	-	-	gi|170101094|ref|XP_001881764.1|/1.0019e-117/predicted protein [Laccaria bicolor S238N-H82]
GME8224_g	9	75	1.51	13.03	3.10922	3.39234e-06	1.33666e-05	-	-	-	-	gi|169864105|ref|XP_001838665.1|/8.0677e-138/Rds1 protein [Coprinopsis cinerea okayama7||130]
GME9504_g	151	1249	25.37	217.07	3.09696	0	0	-	-	-	-	gi|336376924|gb|EGO05259.1|/3.5204e-25/hypothetical protein SERLA73DRAFT_174326 [Serpula lacrymans var. lacrymans S7.3]
GME4114_g	26	215	4.37	37.37	3.09618	1.05008e-10	6.48428e-10	-	-	-	-	gi|169865143|ref|XP_001839175.1|/3.94067e-08/hypothetical protein CC1G_07890 [Coprinopsis cinerea okayama7||130]
GME10678_g	14	115	2.35	19.99	3.08855	1.76758e-07	8.0805e-07	ko01100//Metabolic pathways;ko04122//Sulfur relay system;ko00790//Folate biosynthesis;ko01100//Metabolic pathways;ko00052//Galactose metabolism;ko00740//Riboflavin metabolism;ko00500//Starch and sucrose metabolism	-	GO:0003824//catalytic activity	GO:0044238//primary metabolic process	gi|336364598|gb|EGN92954.1|/0/glycoside hydrolase family 13 protein [Serpula lacrymans var. lacrymans S7.3]
GME7658_g	5	41	0.84	7.13	3.08544	3.0026e-05	0.000102824	-	-	-	-	gi|170107955|ref|XP_001885187.1|/3.86671e-07/predicted protein [Laccaria bicolor S238N-H82]
GME3330_g	6	49	1.01	8.52	3.0765	1.78637e-05	6.38481e-05	-	-	-	-	-
GME1438_g	8	65	1.34	11.3	3.07602	5.98132e-06	2.27253e-05	ko01100//Metabolic pathways;ko00624//Polycyclic aromatic hydrocarbon degradation;ko00340//Histidine metabolism;ko00623//Toluene degradation;ko00627//Aminobenzoate degradation;ko00361//Chlorocyclohexane and chlorobenzene degradation;ko00363//Bisphenol degradation;ko00903//Limonene and pinene degradation;ko00626//Naphthalene degradation;ko01120//Microbial metabolism in diverse environments;ko00643/…	-	-	-	gi|389748885|gb|EIM90062.1|/0/MFS general substrate transporter [Stereum hirsutum FP-91666 SS1]
GME6039_g	18	146	3.02	25.37	3.0705	1.52961e-08	7.76495e-08	-	-	-	-	gi|402225476|gb|EJU05537.1|/4.8196e-30/NADP-binding protein [Dacryopinax sp. DJM-731 SS1]
GME1533_g	24	194	4.03	33.72	3.06475	3.65748e-10	2.14776e-09	ko03013//RNA transport;ko03430//Mismatch repair;ko01100//Metabolic pathways;ko03440//Homologous recombination;ko01040//Biosynthesis of unsaturated fatty acids;ko00061//Fatty acid biosynthesis;ko01110//Biosynthesis of secondary metabolites;ko00640//Propanoate metabolism;ko00620//Pyruvate metabolism;ko03410//Base excision repair;ko01120//Microbial metabolism in diverse environments;ko00040//Pentose…	-	-	-	gi|390594932|gb|EIN04340.1|/3.72623e-101/NAD(P)-binding protein [Punctularia strigosozonata HHB-11173 SS5]
GME6453_g	13	104	2.18	18.07	3.0512	3.22918e-07	1.43984e-06	-	-	-	-	gi|336365142|gb|EGN93494.1|/0/hypothetical protein SERLA73DRAFT_115908 [Serpula lacrymans var. lacrymans S7.3]
GME1981_g	5	40	0.84	6.95	3.04855	3.00368e-05	0.000102819	ko02010//ABC transporters;ko04976//Bile secretion	GO:0031224//intrinsic to membrane	GO:0017111//nucleoside-triphosphatase activity;GO:0015405;GO:0032559	GO:0006810//transport;GO:0009207	gi|170089911|ref|XP_001876178.1|/0/predicted protein [Laccaria bicolor S238N-H82]
GME1644_g	6	48	1.01	8.34	3.04569	1.78641e-05	6.38227e-05	-	-	GO:0005488//binding	-	gi|392589458|gb|EIW78788.1|/5.90833e-104/hypothetical protein CONPUDRAFT_106827 [Coniophora puteana RWD-64-598 SS2]
GME708_g	23	182	3.86	31.63	3.03462	6.82968e-10	3.89228e-09	-	-	-	-	gi|336372343|gb|EGO00682.1|/4.68555e-19/hypothetical protein SERLA73DRAFT_71676 [Serpula lacrymans var. lacrymans S7.3]
GME6803_g	85	671	14.28	116.62	3.02975	0	0	-	-	GO:0003824//catalytic activity;GO:0046914//transition metal ion binding	GO:0008152//metabolic process	gi|336370903|gb|EGN99243.1|/4.55601e-130/hypothetical protein SERLA73DRAFT_137496 [Serpula lacrymans var. lacrymans S7.3]
GME6518_g	57	449	9.58	78.03	3.02593	5.52892e-14	5.44125e-13	-	-	-	-	-
GME4123_g	18	141	3.02	24.51	3.02075	1.52961e-08	7.75569e-08	-	-	-	-	-
GME11423_g	12	94	2.02	16.34	3.01598	5.8705e-07	2.53514e-06	-	-	-	-	gi|170085233|ref|XP_001873840.1|/1.65739e-180/predicted protein [Laccaria bicolor S238N-H82]
GME2170_g	51	393	8.57	68.3	2.99452	9.54792e-15	1.00978e-13	-	-	GO:0003824//catalytic activity	-	gi|302674449|ref|XP_003026909.1|/1.25588e-134/hypothetical protein SCHCODRAFT_70977 [Schizophyllum commune H4-8]
GME6059_g	12	92	2.02	15.99	2.98474	5.8705e-07	2.5403e-06	-	-	-	-	gi|395328119|gb|EJF60513.1|/1.56237e-36/hypothetical protein DICSQDRAFT_170957 [Dichomitus squalens LYAD-421 SS1]
GME6798_g	8	61	1.34	10.6	2.98376	5.98132e-06	2.27354e-05	-	-	-	-	gi|170100865|ref|XP_001881650.1|/1.43301e-151/predicted protein [Laccaria bicolor S238N-H82]
GME1013_g	60	448	10.08	77.86	2.94939	0	0	ko03410//Base excision repair	-	-	-	gi|393217884|gb|EJD03373.1|/1.08901e-88/DNA glycosylase [Fomitiporia mediterranea MF3/22]
GME326_g	7	52	1.18	9.04	2.93754	1.04178e-05	3.8414e-05	-	-	GO:0046872//metal ion binding	-	gi|390594447|gb|EIN03858.1|/1.95929e-17/hypothetical protein PUNSTDRAFT_128606 [Punctularia strigosozonata HHB-11173 SS5]
GME11108_g	112	826	18.82	143.56	2.93132	0	0	-	-	-	-	gi|336368838|gb|EGN97180.1|/1.27239e-71/hypothetical protein SERLA73DRAFT_183827 [Serpula lacrymans var. lacrymans S7.3]
GME4124_g	6	44	1.01	7.65	2.9211	1.78726e-05	6.38264e-05	-	-	-	-	gi|299755179|ref|XP_001828482.2|/9.75811e-44/NWD2 [Coprinopsis cinerea okayama7||130]
GME10054_g	6	44	1.01	7.65	2.9211	1.78726e-05	6.37996e-05	-	-	-	-	gi|170113984|ref|XP_001888190.1|/1.22785e-31/predicted protein [Laccaria bicolor S238N-H82]
GME4515_g	56	402	9.41	69.87	2.89241	1.42109e-14	1.4772e-13	-	-	-	-	gi|336378442|gb|EGO19600.1|/5.77702e-64/hypothetical protein SERLADRAFT_402103 [Serpula lacrymans var. lacrymans S7.9]
GME4000_g	109	782	18.32	135.91	2.89116	0	0	-	-	-	-	gi|242788639|ref|XP_002481261.1|/6.7979e-48/hypothetical protein TSTA_040210 [Talaromyces stipitatus ATCC 10500]
GME9423_g	17	122	2.86	21.2	2.88998	2.83294e-08	1.39887e-07	ko04111//Cell cycle - yeast	GO:0044464//cell part	GO:0005099//Ras GTPase activator activity	GO:0032318//regulation of Ras GTPase activity	gi|170084589|ref|XP_001873518.1|/0/predicted protein [Laccaria bicolor S238N-H82]
GME3059_g	360	2580	60.5	448.4	2.88978	3.53718e-13	2.79783e-12	ko01100//Metabolic pathways;ko04723//Retrograde endocannabinoid signaling;ko04726//Serotonergic synapse;ko04064//NF-kappa B signaling pathway;ko04370//VEGF signaling pathway;ko05200//Pathways in cancer;ko00590//Arachidonic acid metabolism;ko05222//Small cell lung cancer;ko05140//Leishmaniasis	-	-	-	gi|170116596|ref|XP_001889488.1|/0/predicted protein [Laccaria bicolor S238N-H82]
GME9785_g	6	43	1.01	7.47	2.88675	1.78801e-05	6.37996e-05	-	-	-	-	gi|170106135|ref|XP_001884279.1|/8.1881e-21/predicted protein [Laccaria bicolor S238N-H82]
GME7787_g	8	57	1.34	9.91	2.88665	5.9814e-06	2.27154e-05	-	-	-	-	gi|170093988|ref|XP_001878215.1|/7.4265e-21/predicted protein [Laccaria bicolor S238N-H82]
GME601_g	21	148	3.53	25.72	2.86515	2.37804e-09	1.29618e-08	ko01100//Metabolic pathways;ko00592//alpha-Linolenic acid metabolism;ko04141//Protein processing in endoplasmic reticulum	-	GO:0003824//catalytic activity	-	gi|392561428|gb|EIW54609.1|/3.66068e-148/FMN-linked oxidoreductase [Trametes versicolor FP-101664 SS1]
GME6482_g	87	610	14.62	106.02	2.85832	0	0	ko00624//Polycyclic aromatic hydrocarbon degradation;ko01100//Metabolic pathways;ko00627//Aminobenzoate degradation;ko00363//Bisphenol degradation;ko01110//Biosynthesis of secondary metabolites;ko00903//Limonene and pinene degradation;ko00945//Stilbenoid, diarylheptanoid and gingerol biosynthesis;ko01120//Microbial metabolism in diverse environments;ko01100//Metabolic pathways;ko00360//Phenylalan…	-	-	-	gi|170103023|ref|XP_001882727.1|/7.68138e-133/predicted protein [Laccaria bicolor S238N-H82]
GME3538_g	87	609	14.62	105.84	2.85587	0	0	-	-	-	-	gi|299744165|ref|XP_001840924.2|/5.97323e-74/phosphoglycerate mutase [Coprinopsis cinerea okayama7||130]
GME8618_g	84	584	14.12	101.5	2.84567	0	0	ko01100//Metabolic pathways;ko00920//Sulfur metabolism;ko00270//Cysteine and methionine metabolism;ko00450//Selenocompound metabolism;ko00260//Glycine, serine and threonine metabolism;ko01110//Biosynthesis of secondary metabolites;ko02020//Two-component system;ko01100//Metabolic pathways;ko00920//Sulfur metabolism;ko00270//Cysteine and methionine metabolism;ko00450//Selenocompound metabolism;ko00…	-	-	-	gi|170090822|ref|XP_001876633.1|/4.53499e-112/predicted protein [Laccaria bicolor S238N-H82]
GME3373_g	21	146	3.53	25.37	2.84538	2.37804e-09	1.29452e-08	-	-	-	-	gi|336388104|gb|EGO29248.1|/2.84183e-39/hypothetical protein SERLADRAFT_456766 [Serpula lacrymans var. lacrymans S7.9]
GME5028_g	14	97	2.35	16.86	2.84287	1.76758e-07	8.0892e-07	-	-	-	-	gi|336364264|gb|EGN92625.1|/6.34385e-60/hypothetical protein SERLA73DRAFT_163959 [Serpula lacrymans var. lacrymans S7.3]
GME9958_g	13	90	2.18	15.64	2.84284	3.22918e-07	1.43833e-06	-	-	-	GO:0006810//transport	gi|390601920|gb|EIN11313.1|/6.09601e-76/TRAPP complex subunit bet5 [Punctularia strigosozonata HHB-11173 SS5]
GME8866_g	51	353	8.57	61.35	2.8397	9.54792e-15	1.01103e-13	ko00260//Glycine, serine and threonine metabolism	-	-	-	gi|170106181|ref|XP_001884302.1|/5.79073e-167/predicted protein [Laccaria bicolor S238N-H82]
GME4410_g	9	62	1.51	10.78	2.83574	3.39236e-06	1.33605e-05	-	-	-	-	gi|299747368|ref|XP_001836992.2|/1.24391e-48/metalloprotease [Coprinopsis cinerea okayama7||130]
GME6517_g	10	69	1.68	11.99	2.8353	1.90502e-06	7.72825e-06	-	-	-	-	-
GME9286_g	10	69	1.68	11.99	2.8353	1.90502e-06	7.72456e-06	-	-	-	-	-
GME3068_g	149	1021	25.04	177.45	2.82511	2.32702e-13	1.94177e-12	ko00624//Polycyclic aromatic hydrocarbon degradation;ko01100//Metabolic pathways;ko00627//Aminobenzoate degradation;ko00363//Bisphenol degradation;ko01110//Biosynthesis of secondary metabolites;ko00903//Limonene and pinene degradation;ko00945//Stilbenoid, diarylheptanoid and gingerol biosynthesis;ko01120//Microbial metabolism in diverse environments;ko01100//Metabolic pathways;ko00360//Phenylalan…	-	GO:0046872//metal ion binding	-	gi|354961625|dbj|BAL05080.1|/9.69545e-125/cytochrome P450 [Phanerochaete chrysosporium]
GME3950_g	108	738	18.15	128.26	2.82103	0	0	ko04146//Peroxisome	-	-	GO:0006810//transport	gi|395330412|gb|EJF62795.1|/2.62305e-148/MFS general substrate transporter [Dichomitus squalens LYAD-421 SS1]
GME10680_g	6	41	1.01	7.13	2.81955	1.79176e-05	6.39065e-05	-	-	-	-	gi|88192499|pdb|2BWM|A/1.45134e-103/Chain A, 1.8a Crystal Structure Of Of Psathyrella Velutina Lectin In Complex With Methyl 2-Acetamido-1,2-Dideoxy-1-Seleno-Beta- D-Glucopyranoside
GME969_g	38	259	6.39	45.01	2.81636	1.90292e-13	1.61967e-12	ko01100//Metabolic pathways;ko00600//Sphingolipid metabolism	-	GO:0016830//carbon-carbon lyase activity;GO:0048037//cofactor binding	GO:0043436	gi|170092595|ref|XP_001877519.1|/0/predicted protein [Laccaria bicolor S238N-H82]
GME9055_g	14	95	2.35	16.51	2.81261	1.76758e-07	8.07616e-07	-	-	-	-	gi|238582519|ref|XP_002389957.1|/7.44435e-38/hypothetical protein MPER_10847 [Moniliophthora perniciosa FA553]
GME502_g	9	61	1.51	10.6	2.81144	3.39236e-06	1.33543e-05	ko01100//Metabolic pathways;ko04916//Melanogenesis;ko00740//Riboflavin metabolism;ko01110//Biosynthesis of secondary metabolites;ko00350//Tyrosine metabolism	-	GO:0046872//metal ion binding;GO:0004497//monooxygenase activity	GO:0008152//metabolic process	gi|52313414|dbj|BAD51402.1|/2.03977e-91/photo-regulated tyrosinase [Polyporus arcularius]
GME8777_g	35	235	5.88	40.84	2.79609	5.59996e-13	4.28591e-12	-	-	-	-	gi|390600901|gb|EIN10295.1|/9.95646e-88/Six-hairpin glycosidase [Punctularia strigosozonata HHB-11173 SS5]
GME1787_g	38	255	6.39	44.32	2.79407	1.90292e-13	1.6213e-12	ko01100//Metabolic pathways;ko00040//Pentose and glucuronate interconversions;ko01100//Metabolic pathways;ko03010//Ribosome;ko00051//Fructose and mannose metabolism;ko00051//Fructose and mannose metabolism;ko01110//Biosynthesis of secondary metabolites;ko00670//One carbon pool by folate;ko00626//Naphthalene degradation;ko00010//Glycolysis / Gluconeogenesis;ko00830//Retinol metabolism;ko01120//Mic…	-	GO:0003824//catalytic activity;GO:0046914//transition metal ion binding	GO:0008152//metabolic process	gi|169858350|ref|XP_001835820.1|/2.22975e-177/alcohol dehydrogenase [Coprinopsis cinerea okayama7||130]
GME8433_g	56	373	9.41	64.83	2.78439	1.42109e-14	1.47901e-13	ko01100//Metabolic pathways;ko00790//Folate biosynthesis	-	GO:0016874//ligase activity	GO:0008152//metabolic process	gi|170091924|ref|XP_001877184.1|/0/predicted protein [Laccaria bicolor S238N-H82]
GME405_g	27	179	4.54	31.11	2.77661	5.63664e-11	3.55816e-10	-	-	-	-	-
GME11660_g	52	344	8.74	59.79	2.7742	5.4401e-14	5.37249e-13	ko04112//Cell cycle - Caulobacter	-	GO:0004175//endopeptidase activity	GO:0019538//protein metabolic process	gi|302673690|ref|XP_003026531.1|/4.48567e-98/hypothetical protein SCHCODRAFT_86223 [Schizophyllum commune H4-8]
GME10523_g	325	2125	54.61	369.32	2.75763	3.26406e-14	3.30015e-13	ko01100//Metabolic pathways;ko00364//Fluorobenzoate degradation;ko00623//Toluene degradation;ko00361//Chlorocyclohexane and chlorobenzene degradation;ko00362//Benzoate degradation;ko01120//Microbial metabolism in diverse environments	-	GO:0019114;GO:0005506//iron ion binding	GO:0018958//phenol-containing compound metabolic process	gi|299739700|ref|XP_001839720.2|/3.53866e-120/intradiol ring-cleavage dioxygenase [Coprinopsis cinerea okayama7||130]
GME8800_g	42	274	7.06	47.62	2.75383	1.01252e-13	9.51325e-13	-	-	-	-	gi|169860491|ref|XP_001836880.1|/7.77387e-75/hypothetical protein CC1G_00016 [Coprinopsis cinerea okayama7||130]
GME2313_g	117	762	19.66	132.43	2.75189	1.31894e-13	1.19055e-12	-	-	GO:0005488//binding;GO:0003824//catalytic activity	GO:0008152//metabolic process	gi|170108939|ref|XP_001885677.1|/3.61833e-119/predicted protein [Laccaria bicolor S238N-H82]
GME6757_g	40	260	6.72	45.19	2.74947	1.17906e-13	1.08267e-12	-	-	-	-	gi|336385295|gb|EGO26442.1|/0/hypothetical protein SERLADRAFT_447645 [Serpula lacrymans var. lacrymans S7.9]
GME8799_g	46	299	7.73	51.97	2.74914	7.17204e-14	6.92998e-13	ko00040//Pentose and glucuronate interconversions;ko03430//Mismatch repair;ko01100//Metabolic pathways;ko03440//Homologous recombination;ko01040//Biosynthesis of unsaturated fatty acids;ko00061//Fatty acid biosynthesis;ko01110//Biosynthesis of secondary metabolites;ko00640//Propanoate metabolism;ko00620//Pyruvate metabolism;ko03410//Base excision repair;ko01120//Microbial metabolism in diverse en…	-	GO:0003824//catalytic activity	GO:0008152//metabolic process	gi|336373294|gb|EGO01632.1|/3.44335e-135/hypothetical protein SERLA73DRAFT_177048 [Serpula lacrymans var. lacrymans S7.3]
GME9302_g	19	121	3.19	21.03	2.72082	8.23986e-09	4.28785e-08	ko04146//Peroxisome	GO:0031224//intrinsic to membrane;GO:0042579//microbody	-	GO:0016558//protein import into peroxisome matrix	gi|169866211|ref|XP_001839695.1|/4.92697e-102/peroxin 13 [Coprinopsis cinerea okayama7||130]
GME9472_g	87	554	14.62	96.28	2.71929	0	0	ko02010//ABC transporters;ko02010//ABC transporters	GO:0031224//intrinsic to membrane	GO:0017111//nucleoside-triphosphatase activity;GO:0015405;GO:0032559	GO:0009207;GO:0051234//establishment of localization	gi|170084535|ref|XP_001873491.1|/0/pleiotropic drug resistance ABC transporter [Laccaria bicolor S238N-H82]
GME4262_g	31	197	5.21	34.24	2.71633	4.93384e-12	3.39147e-11	ko01100//Metabolic pathways;ko00562//Inositol phosphate metabolism;ko00521//Streptomycin biosynthesis;ko01120//Microbial metabolism in diverse environments;ko01110//Biosynthesis of secondary metabolites	-	GO:0003824//catalytic activity	-	gi|336368274|gb|EGN96617.1|/1.68892e-138/hypothetical protein SERLA73DRAFT_184715 [Serpula lacrymans var. lacrymans S7.3]
GME6227_g	17	108	2.86	18.77	2.71434	2.83294e-08	1.40212e-07	-	-	-	-	gi|336368022|gb|EGN96366.1|/4.38886e-29/hypothetical protein SERLA73DRAFT_186091 [Serpula lacrymans var. lacrymans S7.3]
GME6439_g	32	203	5.38	35.28	2.71317	2.77e-12	1.96605e-11	ko00260//Glycine, serine and threonine metabolism	-	-	-	gi|170096498|ref|XP_001879469.1|/0/predicted protein [Laccaria bicolor S238N-H82]
GME1529_g	15	94	2.52	16.34	2.69691	9.6347e-08	4.50626e-07	ko02010//ABC transporters;ko02010//ABC transporters	GO:0016020//membrane	GO:0017111//nucleoside-triphosphatase activity;GO:0032555	GO:0009207	gi|170109163|ref|XP_001885789.1|/0/pleiotropic drug resistance ABC transporter [Laccaria bicolor S238N-H82]
GME7970_g	7	44	1.18	7.65	2.69667	1.04538e-05	3.84965e-05	ko01100//Metabolic pathways;ko00513//Various types of N-glycan biosynthesis;ko00510//N-Glycan biosynthesis	-	-	-	gi|392596066|gb|EIW85389.1|/1.99134e-113/hypothetical protein CONPUDRAFT_150201 [Coniophora puteana RWD-64-598 SS2]
GME2781_g	11	69	1.85	11.99	2.69623	1.06112e-06	4.45787e-06	ko00750//Vitamin B6 metabolism;ko01100//Metabolic pathways;ko00350//Tyrosine metabolism;ko01120//Microbial metabolism in diverse environments;ko00680//Methane metabolism;ko00260//Glycine, serine and threonine metabolism;ko00624//Polycyclic aromatic hydrocarbon degradation;ko00361//Chlorocyclohexane and chlorobenzene degradation;ko01120//Microbial metabolism in diverse environments;ko00640//Propan…	-	-	-	gi|389747731|gb|EIM88909.1|/2.40108e-79/NAD-P-binding protein [Stereum hirsutum FP-91666 SS1]
GME2133_g	103	635	17.31	110.36	2.67254	0	0	ko00100//Steroid biosynthesis;ko01100//Metabolic pathways	-	GO:0016491//oxidoreductase activity	GO:0008152//metabolic process	gi|169858037|ref|XP_001835665.1|/1.1894e-163/C-3 sterol dehydrogenase [Coprinopsis cinerea okayama7||130]
GME5663_g	27	166	4.54	28.85	2.66781	5.63664e-11	3.56345e-10	ko04972//Pancreatic secretion	-	GO:0000166//nucleotide binding	-	gi|403413519|emb|CCM00219.1|/1.20427e-46/predicted protein [Fibroporia radiculosa]
GME8174_g	48	294	8.07	51.1	2.66268	1.01474e-13	9.51309e-13	ko00624//Polycyclic aromatic hydrocarbon degradation;ko01100//Metabolic pathways;ko00627//Aminobenzoate degradation;ko00363//Bisphenol degradation;ko01110//Biosynthesis of secondary metabolites;ko00903//Limonene and pinene degradation;ko00945//Stilbenoid, diarylheptanoid and gingerol biosynthesis;ko01120//Microbial metabolism in diverse environments;ko01100//Metabolic pathways;ko00627//Aminobenzo…	-	-	-	gi|336383561|gb|EGO24710.1|/1.08455e-156/hypothetical protein SERLADRAFT_349023 [Serpula lacrymans var. lacrymans S7.9]
GME5995_g	17	104	2.86	18.07	2.65951	2.83294e-08	1.40131e-07	ko00624//Polycyclic aromatic hydrocarbon degradation;ko01100//Metabolic pathways;ko00627//Aminobenzoate degradation;ko00363//Bisphenol degradation;ko01110//Biosynthesis of secondary metabolites;ko00903//Limonene and pinene degradation;ko00945//Stilbenoid, diarylheptanoid and gingerol biosynthesis;ko01120//Microbial metabolism in diverse environments;ko01100//Metabolic pathways;ko00360//Phenylalan…	-	GO:0046872//metal ion binding	-	gi|170103023|ref|XP_001882727.1|/7.1414e-158/predicted protein [Laccaria bicolor S238N-H82]
GME2401_g	18	109	3.02	18.94	2.64882	1.52961e-08	7.77423e-08	-	-	-	GO:0006810//transport	gi|170107705|ref|XP_001885062.1|/1.00059e-171/MFS polyamine transporter [Laccaria bicolor S238N-H82]
GME2061_g	50	303	8.4	52.66	2.64825	3.59712e-14	3.62827e-13	-	-	-	GO:0006810//transport	gi|170089391|ref|XP_001875918.1|/1.34898e-12/predicted protein [Laccaria bicolor S238N-H82]
GME6061_g	31	187	5.21	32.5	2.64108	4.93384e-12	3.40247e-11	ko03018//RNA degradation	-	-	-	gi|392586338|gb|EIW75675.1|/1.9693e-38/hypothetical protein CONPUDRAFT_77306 [Coniophora puteana RWD-64-598 SS2]
GME8062_g	33	199	5.55	34.59	2.6398	1.58851e-12	1.15643e-11	ko03022//Basal transcription factors;ko01100//Metabolic pathways;ko00500//Starch and sucrose metabolism	-	-	-	gi|259147278|emb|CAY80531.1|/8.4533e-14/Muc1p [Saccharomyces cerevisiae EC1118]
GME3192_g	45	269	7.56	46.75	2.62851	1.70974e-14	1.76431e-13	-	-	-	-	-
GME11051_g	227	1343	38.15	233.41	2.61311	0	0	-	-	-	-	gi|238607406|ref|XP_002396967.1|/7.7232e-75/hypothetical protein MPER_02689 [Moniliophthora perniciosa FA553]
GME9891_g	8	47	1.34	8.17	2.6081	6.0049e-06	2.27945e-05	-	-	-	-	gi|170110600|ref|XP_001886505.1|/4.96445e-97/predicted protein [Laccaria bicolor S238N-H82]
GME4931_g	52	306	8.74	53.18	2.60518	5.4401e-14	5.36626e-13	-	-	-	-	gi|169850368|ref|XP_001831880.1|/1.709e-21/hypothetical protein CC1G_08397 [Coprinopsis cinerea okayama7||130]
GME883_g	233	1366	39.15	237.41	2.6003	0	0	ko01100//Metabolic pathways;ko00230//Purine metabolism;ko01120//Microbial metabolism in diverse environments	-	GO:0016813//hydrolase activity, acting on carbon-nitrogen (but not peptide) bonds, in linear amidines	-	gi|336371343|gb|EGN99682.1|/0/hypothetical protein SERLA73DRAFT_88261 [Serpula lacrymans var. lacrymans S7.3]
GME5994_g	51	298	8.57	51.79	2.59531	9.54792e-15	1.01356e-13	-	-	-	-	-
GME3216_g	18	105	3.02	18.25	2.59528	1.52961e-08	7.76032e-08	-	-	-	-	gi|170093558|ref|XP_001878000.1|/5.97268e-27/predicted protein [Laccaria bicolor S238N-H82]
GME9584_g	209	1220	35.12	212.03	2.5939	1.68532e-13	1.45781e-12	ko01100//Metabolic pathways;ko00030//Pentose phosphate pathway;ko00480//Glutathione metabolism;ko00280//Valine, leucine and isoleucine degradation;ko02020//Two-component system;ko01100//Metabolic pathways;ko00591//Linoleic acid metabolism;ko00051//Fructose and mannose metabolism;ko00362//Benzoate degradation;ko00363//Bisphenol degradation;ko01110//Biosynthesis of secondary metabolites;ko00903//Li…	-	GO:0016491//oxidoreductase activity	GO:0008152//metabolic process	gi|389751548|gb|EIM92621.1|/2.02303e-104/NAD-P-binding protein [Stereum hirsutum FP-91666 SS1]
GME2585_g	580	3357	97.46	583.44	2.5817	1.57874e-13	1.38821e-12	-	-	-	-	gi|169856373|ref|XP_001834846.1|/3.31664e-111/hypothetical protein CC1G_08491 [Coprinopsis cinerea okayama7||130]
GME280_g	26	149	4.37	25.9	2.56725	1.05008e-10	6.48899e-10	-	-	GO:0003676//nucleic acid binding;GO:0046914//transition metal ion binding;GO:0032559	GO:0006305	gi|170086666|ref|XP_001874556.1|/0/predicted protein [Laccaria bicolor S238N-H82]
GME4651_g	46	263	7.73	45.71	2.56397	7.17204e-14	6.93787e-13	ko03008//Ribosome biogenesis in eukaryotes;ko03018//RNA degradation	-	-	-	gi|299749174|ref|XP_001838563.2|/0/exonuclease II [Coprinopsis cinerea okayama7||130]
GME9287_g	7	40	1.18	6.95	2.55823	1.0765e-05	3.96083e-05	-	-	-	-	gi|169855942|ref|XP_001834633.1|/2.54559e-26/hypothetical protein CC1G_05770 [Coprinopsis cinerea okayama7||130]
GME9833_g	100	569	16.8	98.89	2.55736	7.9936e-15	8.53889e-14	ko04910//Insulin signaling pathway;ko00500//Starch and sucrose metabolism	-	GO:0035251//UDP-glucosyltransferase activity	GO:0005977//glycogen metabolic process	gi|169847251|ref|XP_001830337.1|/0/glycogen synthase [Coprinopsis cinerea okayama7||130]
GME8904_g	16	91	2.69	15.82	2.55607	5.23262e-08	2.52085e-07	ko01100//Metabolic pathways;ko00790//Folate biosynthesis	-	-	-	gi|393216441|gb|EJD01931.1|/2.3173e-110/thaumatin-like protein [Fomitiporia mediterranea MF3/22]
GME4094_g	15	85	2.52	14.77	2.55117	9.63472e-08	4.49885e-07	-	-	-	-	gi|238582519|ref|XP_002389957.1|/3.12633e-21/hypothetical protein MPER_10847 [Moniliophthora perniciosa FA553]
GME8006_g	41	232	6.89	40.32	2.54892	1.3789e-13	1.23159e-12	-	-	-	-	gi|170093105|ref|XP_001877774.1|/1.3799e-33/predicted protein [Laccaria bicolor S238N-H82]
GME5913_g	11	62	1.85	10.78	2.54276	1.06134e-06	4.45656e-06	-	-	GO:0004672//protein kinase activity;GO:0032559	GO:0006464//cellular protein modification process	gi|169865137|ref|XP_001839172.1|/1.88513e-124/CMGC/CDK/CDK8 protein kinase [Coprinopsis cinerea okayama7||130]
GME4100_g	23	129	3.86	22.42	2.53811	6.82968e-10	3.90012e-09	ko01100//Metabolic pathways;ko00052//Galactose metabolism;ko00740//Riboflavin metabolism;ko00500//Starch and sucrose metabolism	-	GO:0003824//catalytic activity	-	gi|389741170|gb|EIM82359.1|/0/alpha-glucosidase [Stereum hirsutum FP-91666 SS1]
GME3531_g	9	50	1.51	8.69	2.52481	3.40732e-06	1.3407e-05	-	-	-	-	gi|170111406|ref|XP_001886907.1|/3.68864e-43/predicted protein [Laccaria bicolor S238N-H82]
GME6295_g	31	170	5.21	29.55	2.5038	4.93384e-12	3.39696e-11	-	-	-	-	gi|336372723|gb|EGO01062.1|/3.32972e-34/hypothetical protein SERLA73DRAFT_179112 [Serpula lacrymans var. lacrymans S7.3]
GME9514_g	142	773	23.86	134.34	2.49322	2.64456e-13	2.16011e-12	ko04070//Phosphatidylinositol signaling system;ko00562//Inositol phosphate metabolism;ko04810//Regulation of actin cytoskeleton;ko04145//Phagosome	-	GO:0005488//binding	GO:0044237//cellular metabolic process;GO:0044238//primary metabolic process	gi|170084449|ref|XP_001873448.1|/0/predicted protein [Laccaria bicolor S238N-H82]
GME4796_g	53	288	8.91	50.05	2.48987	4.4631e-14	4.43857e-13	ko04113//Meiosis - yeast	-	-	-	gi|395333241|gb|EJF65619.1|/8.0541e-180/general substrate transporter [Dichomitus squalens LYAD-421 SS1]
GME9973_g	31	168	5.21	29.2	2.48661	4.93384e-12	3.39421e-11	-	GO:0044464//cell part	GO:0005337//nucleoside transmembrane transporter activity	GO:0051234//establishment of localization	gi|169847494|ref|XP_001830458.1|/0/H+/nucleoside cotransporter [Coprinopsis cinerea okayama7||130]
GME11311_g	10	54	1.68	9.39	2.48266	1.91044e-06	7.74284e-06	-	-	-	-	gi|170083909|ref|XP_001873178.1|/0/predicted protein [Laccaria bicolor S238N-H82]
GME2375_g	13	70	2.18	12.17	2.48093	3.22946e-07	1.43395e-06	-	-	-	-	gi|336365945|gb|EGN94293.1|/4.43405e-69/hypothetical protein SERLA73DRAFT_188095 [Serpula lacrymans var. lacrymans S7.3]
GME9750_g	43	232	7.23	40.32	2.47943	1.06137e-13	9.84173e-13	ko01100//Metabolic pathways;ko00230//Purine metabolism;ko00330//Arginine and proline metabolism	GO:0044424//intracellular part	GO:0046914//transition metal ion binding;GO:0016811//hydrolase activity, acting on carbon-nitrogen (but not peptide) bonds, in linear amides	GO:0043603//cellular amide metabolic process	gi|170098735|ref|XP_001880586.1|/0/urease [Laccaria bicolor S238N-H82]
GME2074_g	8	43	1.34	7.47	2.47888	6.19858e-06	2.34982e-05	-	GO:0016020//membrane	-	GO:0006810//transport	gi|386649505|gb|AFJ15558.1|/2.92789e-91/putative aquaporin 4 [Laccaria bicolor]
GME1553_g	67	357	11.26	62.05	2.46222	0	0	ko02010//ABC transporters	GO:0031224//intrinsic to membrane	GO:0017111//nucleoside-triphosphatase activity;GO:0015405;GO:0032559	GO:0009207;GO:0051234//establishment of localization	gi|170109163|ref|XP_001885789.1|/0/pleiotropic drug resistance ABC transporter [Laccaria bicolor S238N-H82]
GME697_g	43	227	7.23	39.45	2.44796	1.06137e-13	9.82031e-13	-	-	-	-	gi|392591373|gb|EIW80701.1|/9.95798e-84/hypothetical protein CONPUDRAFT_154712 [Coniophora puteana RWD-64-598 SS2]
GME10506_g	31	163	5.21	28.33	2.44298	4.93384e-12	3.39971e-11	ko04142//Lysosome;ko05152//Tuberculosis	-	-	-	gi|395332218|gb|EJF64597.1|/3.08111e-64/acid protease [Dichomitus squalens LYAD-421 SS1]
GME2267_g	9	47	1.51	8.17	2.43579	3.47e-06	1.36221e-05	-	-	-	-	gi|170108949|ref|XP_001885682.1|/0/predicted protein [Laccaria bicolor S238N-H82]
GME688_g	39	203	6.55	35.28	2.42928	1.38112e-13	1.22841e-12	ko01100//Metabolic pathways;ko00500//Starch and sucrose metabolism	GO:0044464//cell part	-	-	gi|299751996|ref|XP_001830639.2|/0/hypothetical protein CC1G_06905 [Coprinopsis cinerea okayama7||130]
GME7678_g	212	1099	35.62	191	2.42281	0	0	ko00624//Polycyclic aromatic hydrocarbon degradation;ko01100//Metabolic pathways;ko00627//Aminobenzoate degradation;ko00363//Bisphenol degradation;ko01110//Biosynthesis of secondary metabolites;ko00903//Limonene and pinene degradation;ko00945//Stilbenoid, diarylheptanoid and gingerol biosynthesis;ko01120//Microbial metabolism in diverse environments;ko01100//Metabolic pathways;ko00590//Arachidoni…	-	GO:0005506//iron ion binding	-	gi|170093850|ref|XP_001878146.1|/0/predicted protein [Laccaria bicolor S238N-H82]
GME9561_g	106	547	17.81	95.07	2.4163	0	0	-	-	-	-	gi|390604967|gb|EIN14358.1|/2.43392e-107/hypothetical protein PUNSTDRAFT_49178 [Punctularia strigosozonata HHB-11173 SS5]
GME340_g	163	840	27.39	145.99	2.41415	1.95843e-13	1.65368e-12	-	-	-	-	gi|299754980|ref|XP_001828342.2|/5.30954e-89/hypothetical protein CC1G_12072 [Coprinopsis cinerea okayama7||130]
GME7971_g	202	1040	33.94	180.75	2.41294	0	0	ko00910//Nitrogen metabolism	-	GO:0016703	GO:0008152//metabolic process	gi|170094148|ref|XP_001878295.1|/1.14385e-141/predicted protein [Laccaria bicolor S238N-H82]
GME861_g	27	139	4.54	24.16	2.41186	5.63664e-11	3.5608e-10	ko02020//Two-component system;ko01100//Metabolic pathways;ko00591//Linoleic acid metabolism;ko00051//Fructose and mannose metabolism;ko00362//Benzoate degradation;ko00363//Bisphenol degradation;ko01110//Biosynthesis of secondary metabolites;ko00903//Limonene and pinene degradation;ko00650//Butanoate metabolism;ko00626//Naphthalene degradation;ko00625//Chloroalkane and chloroalkene degradation;ko0…	-	GO:0003824//catalytic activity	GO:0008152//metabolic process	gi|336371260|gb|EGN99599.1|/1.03447e-103/hypothetical protein SERLA73DRAFT_52555 [Serpula lacrymans var. lacrymans S7.3]
GME2237_g	39	200	6.55	34.76	2.40786	1.38112e-13	1.23228e-12	-	-	-	-	gi|299743168|ref|XP_001835583.2|/1.52016e-105/hypothetical protein CC1G_03365 [Coprinopsis cinerea okayama7||130]
GME6721_g	27	137	4.54	23.81	2.3908	5.63664e-11	3.55288e-10	-	-	-	-	gi|299750865|ref|XP_002911560.1|/5.69215e-119/hypothetical protein CC1G_14092 [Coprinopsis cinerea okayama7||130]
GME6804_g	17	86	2.86	14.95	2.38606	2.833e-08	1.39808e-07	-	-	-	-	gi|170099033|ref|XP_001880735.1|/7.49131e-41/predicted protein [Laccaria bicolor S238N-H82]
GME4484_g	21	106	3.53	18.42	2.38353	2.37804e-09	1.29535e-08	-	-	-	-	gi|393214697|gb|EJD00190.1|/3.09206e-71/hypothetical protein FOMMEDRAFT_159840 [Fomitiporia mediterranea MF3/22]
GME8336_g	103	518	17.31	90.03	2.3788	0	0	ko01100//Metabolic pathways;ko00360//Phenylalanine metabolism;ko00340//Histidine metabolism;ko00010//Glycolysis / Gluconeogenesis;ko00410//beta-Alanine metabolism;ko00980//Metabolism of xenobiotics by cytochrome P450;ko00350//Tyrosine metabolism;ko01120//Microbial metabolism in diverse environments;ko00982//Drug metabolism - cytochrome P450;ko00903//Limonene and pinene degradation;ko00626//Naphth…	-	-	GO:0008152//metabolic process	gi|390601152|gb|EIN10546.1|/1.53106e-174/aldehyde dehydrogenase [Punctularia strigosozonata HHB-11173 SS5]
GME3834_g	11	55	1.85	9.56	2.36949	1.07101e-06	4.49496e-06	-	-	-	-	gi|327297496|ref|XP_003233442.1|/5.1886e-06/hypothetical protein TERG_06432 [Trichophyton rubrum CBS 118892]
GME9040_g	12	60	2.02	10.43	2.36831	5.89116e-07	2.54019e-06	-	-	-	-	gi|238582519|ref|XP_002389957.1|/8.18246e-46/hypothetical protein MPER_10847 [Moniliophthora perniciosa FA553]
GME11623_g	56	278	9.41	48.32	2.36035	1.42109e-14	1.48446e-13	ko05166//HTLV-I infection	-	-	-	gi|395334034|gb|EJF66410.1|/6.65129e-59/hypothetical protein DICSQDRAFT_75064 [Dichomitus squalens LYAD-421 SS1]
GME8657_g	173	857	29.07	148.94	2.35713	3.4328e-13	2.72541e-12	-	-	-	-	gi|336373466|gb|EGO01804.1|/6.29474e-75/hypothetical protein SERLA73DRAFT_177321 [Serpula lacrymans var. lacrymans S7.3]
GME11411_g	17	84	2.86	14.6	2.35188	2.8331e-08	1.39732e-07	ko05016//Huntington's disease;ko01100//Metabolic pathways;ko00190//Oxidative phosphorylation;ko05010//Alzheimer's disease;ko05012//Parkinson's disease	-	GO:0005488//binding	GO:0006629//lipid metabolic process	gi|170085217|ref|XP_001873832.1|/8.70764e-121/predicted protein [Laccaria bicolor S238N-H82]
GME1448_g	98	483	16.47	83.94	2.34952	0	0	ko01040//Biosynthesis of unsaturated fatty acids	-	-	-	gi|336388187|gb|EGO29331.1|/1.97879e-134/hypothetical protein SERLADRAFT_456941 [Serpula lacrymans var. lacrymans S7.9]
GME7171_g	10	49	1.68	8.52	2.34239	1.98613e-06	8.0343e-06	ko03018//RNA degradation	-	GO:0003676//nucleic acid binding;GO:0004518//nuclease activity	-	gi|170095541|ref|XP_001878991.1|/0/predicted protein [Laccaria bicolor S238N-H82]
GME7175_g	9	44	1.51	7.65	2.34091	3.78392e-06	1.47998e-05	-	-	-	-	-
GME8710_g	348	1703	58.48	295.98	2.33948	0	0	ko01100//Metabolic pathways;ko00071//Fatty acid metabolism;ko01040//Biosynthesis of unsaturated fatty acids;ko03320//PPAR signaling pathway;ko00592//alpha-Linolenic acid metabolism;ko01110//Biosynthesis of secondary metabolites;ko00640//Propanoate metabolism;ko04146//Peroxisome;ko00280//Valine, leucine and isoleucine degradation;ko00410//beta-Alanine metabolism	-	GO:0050662//coenzyme binding;GO:0016627//oxidoreductase activity, acting on the CH-CH group of donors	GO:0008152//metabolic process	gi|170086986|ref|XP_001874716.1|/0/predicted protein [Laccaria bicolor S238N-H82]
GME4338_g	47	230	7.9	39.97	2.33899	0	0	-	-	-	-	gi|170087722|ref|XP_001875084.1|/1.30026e-61/predicted protein [Laccaria bicolor S238N-H82]
GME2956_g	412	2006	69.23	348.64	2.33227	1.62537e-13	1.41749e-12	ko03008//Ribosome biogenesis in eukaryotes;ko04723//Retrograde endocannabinoid signaling	-	-	-	gi|169867144|ref|XP_001840153.1|/2.3582e-137/N-acyl-phosphatidylethanolamine-hydrolyzing phospholipase D [Coprinopsis cinerea okayama7||130]
GME6702_g	37	180	6.22	31.28	2.33025	2.4758e-13	2.0399e-12	-	-	GO:0048037//cofactor binding;GO:0003824//catalytic activity	-	gi|170101414|ref|XP_001881924.1|/1.60213e-165/predicted protein [Laccaria bicolor S238N-H82]
GME9587_g	13	63	2.18	10.95	2.32853	3.24174e-07	1.43865e-06	ko00760//Nicotinate and nicotinamide metabolism;ko01100//Metabolic pathways	-	-	-	gi|170085649|ref|XP_001874048.1|/2.51008e-62/predicted protein [Laccaria bicolor S238N-H82]
GME11315_g	19	92	3.19	15.99	2.32554	8.24006e-09	4.28534e-08	ko00040//Pentose and glucuronate interconversions;ko03430//Mismatch repair;ko01100//Metabolic pathways;ko03440//Homologous recombination;ko01040//Biosynthesis of unsaturated fatty acids;ko00061//Fatty acid biosynthesis;ko01110//Biosynthesis of secondary metabolites;ko00640//Propanoate metabolism;ko00620//Pyruvate metabolism;ko03410//Base excision repair;ko01120//Microbial metabolism in diverse en…	-	GO:0003824//catalytic activity	GO:0008152//metabolic process	gi|238581561|ref|XP_002389650.1|/2.43241e-97/hypothetical protein MPER_11191 [Moniliophthora perniciosa FA553]
GME2328_g	141	680	23.69	118.18	2.31864	0	0	-	-	-	-	gi|170108941|ref|XP_001885678.1|/2.79318e-59/predicted protein [Laccaria bicolor S238N-H82]
GME11015_g	62	298	10.42	51.79	2.31332	0	0	-	-	-	-	gi|170099776|ref|XP_001881106.1|/3.1648e-83/predicted protein [Laccaria bicolor S238N-H82]
GME4866_g	35	168	5.88	29.2	2.31208	5.59996e-13	4.27821e-12	-	-	-	-	gi|302672952|ref|XP_003026163.1|/1.35303e-22/hypothetical protein SCHCODRAFT_71290 [Schizophyllum commune H4-8]
GME5647_g	13	62	2.18	10.78	2.30596	3.2505e-07	1.44178e-06	-	-	-	-	gi|302692616|ref|XP_003035987.1|/1.75511e-27/hypothetical protein SCHCODRAFT_105639 [Schizophyllum commune H4-8]
GME341_g	17	81	2.86	14.08	2.29956	2.83366e-08	1.39679e-07	-	-	-	-	gi|170087688|ref|XP_001875067.1|/6.2005e-94/predicted protein [Laccaria bicolor S238N-H82]
GME1915_g	53	252	8.91	43.8	2.29743	4.4631e-14	4.43338e-13	ko01100//Metabolic pathways;ko00670//One carbon pool by folate;ko03440//Homologous recombination;ko00240//Pyrimidine metabolism	GO:0044424//intracellular part	GO:0042083//5,10-methylenetetrahydrofolate-dependent methyltransferase activity	GO:0009177;GO:0006730//one-carbon metabolic process	gi|170116608|ref|XP_001889494.1|/4.34084e-150/predicted protein [Laccaria bicolor S238N-H82]
GME1228_g	12	57	2.02	9.91	2.29453	5.97232e-07	2.56867e-06	-	-	-	-	gi|170108322|ref|XP_001885370.1|/3.70456e-25/predicted protein [Laccaria bicolor S238N-H82]
GME3544_g	26	123	4.37	21.38	2.29056	1.05008e-10	6.49843e-10	-	-	-	-	gi|170112832|ref|XP_001887617.1|/2.14166e-131/predicted protein [Laccaria bicolor S238N-H82]
GME9909_g	84	396	14.12	68.82	2.28509	0	0	-	-	-	-	gi|170093021|ref|XP_001877732.1|/0/predicted protein [Laccaria bicolor S238N-H82]
GME5759_g	28	132	4.71	22.94	2.28407	3.03432e-11	1.95757e-10	-	-	-	-	gi|170113310|ref|XP_001887855.1|/4.97947e-42/predicted protein [Laccaria bicolor S238N-H82]
GME9933_g	82	386	13.78	67.09	2.28352	0	0	ko01100//Metabolic pathways;ko00909//Sesquiterpenoid and triterpenoid biosynthesis;ko01110//Biosynthesis of secondary metabolites	-	-	-	gi|389741876|gb|EIM83064.1|/5.87558e-52/hypothetical protein STEHIDRAFT_141577 [Stereum hirsutum FP-91666 SS1]
GME8760_g	464	2176	77.97	378.18	2.27808	0	0	-	-	-	-	gi|299747995|ref|XP_001837388.2|/1.77547e-73/hypothetical protein CC1G_01300 [Coprinopsis cinerea okayama7||130]
GME11456_g	57	265	9.58	46.06	2.26542	5.52892e-14	5.42868e-13	ko02010//ABC transporters;ko01100//Metabolic pathways;ko00330//Arginine and proline metabolism;ko00520//Amino sugar and nucleotide sugar metabolism;ko00051//Fructose and mannose metabolism;ko01110//Biosynthesis of secondary metabolites	-	GO:0005515//protein binding	GO:0044267//cellular protein metabolic process	gi|392571632|gb|EIW64804.1|/1.8744e-77/DnaJ-domain-containing protein, partial [Trametes versicolor FP-101664 SS1]
GME6788_g	24	111	4.03	19.29	2.259	3.6575e-10	2.14629e-09	-	-	-	-	-
GME1734_g	15	69	2.52	11.99	2.25034	9.6802e-08	4.5176e-07	-	GO:0044464//cell part	GO:0005088//Ras guanyl-nucleotide exchange factor activity	GO:0007266//Rho protein signal transduction	gi|299751886|ref|XP_001830558.2|/2.15009e-36/hypothetical protein CC1G_06824 [Coprinopsis cinerea okayama7||130]
GME10681_g	10	46	1.68	7.99	2.24973	2.30152e-06	9.288e-06	-	-	-	-	gi|375333787|gb|AFA53122.1|/5.30279e-114/lectin 2 [Agrocybe aegerita]
GME723_g	56	255	9.41	44.32	2.23569	1.42109e-14	1.48264e-13	-	-	-	-	gi|403413457|emb|CCM00157.1|/5.53165e-17/predicted protein [Fibroporia radiculosa]
GME9503_g	51	232	8.57	40.32	2.23413	9.54792e-15	1.00852e-13	ko00900//Terpenoid backbone biosynthesis;ko01110//Biosynthesis of secondary metabolites	-	-	-	gi|299756412|ref|XP_001829313.2|/1.51517e-117/trans-hexaprenyltranstransferase [Coprinopsis cinerea okayama7||130]
GME7064_g	13	59	2.18	10.25	2.23322	3.3318e-07	1.47477e-06	-	-	-	-	gi|299738308|ref|XP_002910064.1|/3.17546e-36/NWD2 [Coprinopsis cinerea okayama7||130]
GME1615_g	53	241	8.91	41.88	2.23276	4.4631e-14	4.44376e-13	-	-	-	-	gi|336375516|gb|EGO03852.1|/3.60235e-08/hypothetical protein SERLA73DRAFT_175533 [Serpula lacrymans var. lacrymans S7.3]
GME11516_g	25	113	4.2	19.64	2.22533	1.95872e-10	1.19049e-09	ko03430//Mismatch repair;ko05200//Pathways in cancer;ko05210//Colorectal cancer;ko03430//Mismatch repair;ko05200//Pathways in cancer;ko05210//Colorectal cancer	-	GO:0005488//binding	-	gi|170084117|ref|XP_001873282.1|/0/predicted protein [Laccaria bicolor S238N-H82]
GME6174_g	78	352	13.11	61.18	2.22239	0	0	ko00904//Diterpenoid biosynthesis	-	-	-	gi|170108535|ref|XP_001885476.1|/1.49216e-145/predicted protein [Laccaria bicolor S238N-H82]
GME12080_g	67	302	11.26	52.49	2.22084	0	0	-	-	-	-	-
GME9393_g	24	108	4.03	18.77	2.21958	3.65756e-10	2.14484e-09	-	-	-	-	gi|170084681|ref|XP_001873564.1|/0/predicted protein [Laccaria bicolor S238N-H82]
GME8697_g	10	45	1.68	7.82	2.21871	2.57344e-06	1.03559e-05	-	-	-	-	gi|169860677|ref|XP_001836973.1|/2.69882e-31/hypothetical protein CC1G_00109 [Coprinopsis cinerea okayama7||130]
GME1260_g	12	54	2.02	9.39	2.21677	6.3597e-07	2.73252e-06	-	-	-	-	-
GME11542_g	124	557	20.84	96.8	2.21565	8.83738e-14	8.41481e-13	-	-	-	-	gi|169843504|ref|XP_001828481.1|/1.94148e-57/endoplasmic reticulum protein [Coprinopsis cinerea okayama7||130]
GME11477_g	33	148	5.55	25.72	2.21233	1.58851e-12	1.15544e-11	-	-	-	-	gi|169844306|ref|XP_001828874.1|/0/RNA-directed RNA polymerase 2 [Coprinopsis cinerea okayama7||130]
GME5915_g	14	62	2.35	10.78	2.19762	1.82834e-07	8.30914e-07	ko01100//Metabolic pathways;ko00310//Lysine degradation;ko00780//Biotin metabolism	-	-	-	gi|302696145|ref|XP_003037751.1|/1.88911e-110/hypothetical protein SCHCODRAFT_83719 [Schizophyllum commune H4-8]
GME11634_g	275	1217	46.21	211.51	2.19445	5.74208e-13	4.37892e-12	-	-	-	-	gi|299755985|ref|XP_002912154.1|/2.23057e-119/hypothetical protein CC1G_13686 [Coprinopsis cinerea okayama7||130]
GME3478_g	19	84	3.19	14.6	2.19434	8.25204e-09	4.28894e-08	-	-	-	-	gi|390597822|gb|EIN07221.1|/7.66116e-123/DUF726-domain-containing protein [Punctularia strigosozonata HHB-11173 SS5]
GME5652_g	31	137	5.21	23.81	2.19221	4.93384e-12	3.40523e-11	-	-	-	-	gi|403413496|emb|CCM00196.1|/2.46693e-159/predicted protein [Fibroporia radiculosa]
GME1515_g	10	44	1.68	7.65	2.187	3.0278e-06	1.20137e-05	ko00930//Caprolactam degradation;ko01120//Microbial metabolism in diverse environments	-	-	-	gi|336371787|gb|EGO00127.1|/0/hypothetical protein SERLA73DRAFT_107112 [Serpula lacrymans var. lacrymans S7.3]
GME271_g	10	44	1.68	7.65	2.187	3.0278e-06	1.20081e-05	-	-	-	-	gi|392565066|gb|EIW58243.1|/1.00054e-130/DUF676-domain-containing protein [Trametes versicolor FP-101664 SS1]
GME4658_g	18	79	3.02	13.73	2.18471	1.53533e-08	7.78002e-08	ko01100//Metabolic pathways;ko00071//Fatty acid metabolism;ko01110//Biosynthesis of secondary metabolites;ko00626//Naphthalene degradation;ko00010//Glycolysis / Gluconeogenesis;ko00625//Chloroalkane and chloroalkene degradation;ko00350//Tyrosine metabolism;ko01120//Microbial metabolism in diverse environments	-	-	-	gi|337295048|dbj|BAK40869.1|/9.46387e-68/medium-chain dehydrogenase/reductase like protein [Phanerochaete sordida]
GME6305_g	12	52	2.02	9.04	2.16197	7.24264e-07	3.08847e-06	ko03040//Spliceosome	-	-	-	gi|395329406|gb|EJF61793.1|/3.55838e-86/SYF2-domain-containing protein [Dichomitus squalens LYAD-421 SS1]
GME3358_g	16	69	2.69	11.99	2.15615	5.35908e-08	2.57302e-07	-	-	-	-	gi|336368413|gb|EGN96756.1|/3.08939e-25/hypothetical protein SERLA73DRAFT_161770 [Serpula lacrymans var. lacrymans S7.3]
GME2790_g	361	1548	60.66	269.04	2.149	0	0	-	GO:0031224//intrinsic to membrane	-	GO:0051234//establishment of localization	gi|170111322|ref|XP_001886865.1|/6.29878e-130/predicted protein [Laccaria bicolor S238N-H82]
GME170_g	254	1089	42.68	189.26	2.14874	2.76224e-13	2.23689e-12	-	-	GO:0046914//transition metal ion binding	-	gi|170104926|ref|XP_001883676.1|/3.43331e-100/predicted protein [Laccaria bicolor S238N-H82]
GME4314_g	70	300	11.76	52.14	2.1485	0	0	-	-	GO:0005488//binding	-	gi|170104850|ref|XP_001883638.1|/0/predicted protein [Laccaria bicolor S238N-H82]
GME7909_g	39	167	6.55	29.02	2.14748	1.38112e-13	1.2297e-12	ko01100//Metabolic pathways;ko00052//Galactose metabolism;ko00520//Amino sugar and nucleotide sugar metabolism;ko04060//Cytokine-cytokine receptor interaction;ko04640//Hematopoietic cell lineage;ko04630//Jak-STAT signaling pathway;ko01110//Biosynthesis of secondary metabolites	-	GO:0046872//metal ion binding;GO:0016779//nucleotidyltransferase activity	GO:0005975//carbohydrate metabolic process	gi|395330117|gb|EJF62501.1|/1.38783e-149/galactose-1-phosphate uridylyltransferase [Dichomitus squalens LYAD-421 SS1]
GME11082_g	11	47	1.85	8.17	2.14281	1.7157e-06	7.01037e-06	-	-	-	-	gi|299746420|ref|XP_002911048.1|/4.01905e-25/other/AgaK1 protein kinase [Coprinopsis cinerea okayama7||130]
GME8228_g	33	141	5.55	24.51	2.14281	1.58851e-12	1.15742e-11	-	-	-	-	gi|259486230|tpe|CBF83904.1|/9.72968e-07/TPA: F-box domain protein (AFU_orthologue; AFUA_4G00200) [Aspergillus nidulans FGSC A4]
GME5421_g	39	166	6.55	28.85	2.139	1.38112e-13	1.22713e-12	ko04260//Cardiac muscle contraction;ko05416//Viral myocarditis;ko05410//Hypertrophic cardiomyopathy (HCM);ko04270//Vascular smooth muscle contraction;ko04530//Tight junction;ko05132//Salmonella infection;ko04810//Regulation of actin cytoskeleton;ko05414//Dilated cardiomyopathy	-	-	-	gi|392592023|gb|EIW81350.1|/8.50383e-16/hypothetical protein CONPUDRAFT_144163 [Coniophora puteana RWD-64-598 SS2]
GME796_g	24	102	4.03	17.73	2.13734	3.6594e-10	2.14297e-09	-	-	-	-	gi|170098454|ref|XP_001880446.1|/0/predicted protein [Laccaria bicolor S238N-H82]
GME873_g	304	1289	51.08	224.02	2.1328	0	0	ko04330//Notch signaling pathway;ko05169//Epstein-Barr virus infection	-	-	GO:0006351//transcription, DNA-dependent	gi|170093097|ref|XP_001877770.1|/0/predicted protein [Laccaria bicolor S238N-H82]
GME8603_g	970	4112	163	714.65	2.13236	0	0	ko00720//Carbon fixation pathways in prokaryotes;ko00900//Terpenoid backbone biosynthesis;ko04975//Fat digestion and absorption;ko00362//Benzoate degradation;ko01110//Biosynthesis of secondary metabolites;ko00640//Propanoate metabolism;ko00380//Tryptophan metabolism;ko01120//Microbial metabolism in diverse environments;ko02020//Two-component system;ko00071//Fatty acid metabolism;ko00630//Glyoxyla…	-	GO:0016746//transferase activity, transferring acyl groups	-	gi|299747538|ref|XP_002911185.1|/1.24797e-164/acetyl-CoA acetyltransferase [Coprinopsis cinerea okayama7||130]
GME8937_g	51	216	8.57	37.54	2.13106	9.54792e-15	1.01229e-13	-	-	-	-	gi|170092585|ref|XP_001877514.1|/2.99171e-58/predicted protein [Laccaria bicolor S238N-H82]
GME5385_g	31	131	5.21	22.77	2.12778	4.93384e-12	3.408e-11	-	-	-	-	-
GME4078_g	68	286	11.43	49.71	2.12071	0	0	-	-	-	-	gi|169866540|ref|XP_001839857.1|/3.43428e-24/hypothetical protein CC1G_09191 [Coprinopsis cinerea okayama7||130]
GME7381_g	10	42	1.68	7.3	2.11944	5.03752e-06	1.94523e-05	-	-	-	-	gi|170097737|ref|XP_001880088.1|/0/predicted protein [Laccaria bicolor S238N-H82]
GME4832_g	15	63	2.52	10.95	2.11944	1.06236e-07	4.94432e-07	ko01100//Metabolic pathways;ko00920//Sulfur metabolism;ko00051//Fructose and mannose metabolism;ko00030//Pentose phosphate pathway;ko01110//Biosynthesis of secondary metabolites;ko00620//Pyruvate metabolism;ko00010//Glycolysis / Gluconeogenesis;ko00270//Cysteine and methionine metabolism;ko00280//Valine, leucine and isoleucine degradation;ko00020//Citrate cycle (TCA cycle);ko01120//Microbial meta…	-	GO:0003824//catalytic activity	GO:0009069//serine family amino acid metabolic process;GO:0000097//sulfur amino acid biosynthetic process	gi|392569620|gb|EIW62793.1|/3.13701e-167/PALP-domain-containing protein [Trametes versicolor FP-101664 SS1]
GME8303_g	26	109	4.37	18.94	2.11573	1.05048e-10	6.48204e-10	-	-	-	-	gi|170090532|ref|XP_001876488.1|/2.46991e-97/predicted protein [Laccaria bicolor S238N-H82]
GME9011_g	22	92	3.7	15.99	2.11157	1.27912e-09	7.13671e-09	-	-	-	-	gi|170113984|ref|XP_001888190.1|/2.51723e-50/predicted protein [Laccaria bicolor S238N-H82]
GME2846_g	91	379	15.29	65.87	2.10703	0	0	-	-	-	-	gi|336363180|gb|EGN91607.1|/7.83018e-52/hypothetical protein SERLA73DRAFT_192210 [Serpula lacrymans var. lacrymans S7.3]
GME8388_g	25	104	4.2	18.07	2.10514	1.96057e-10	1.19077e-09	-	-	GO:0004721//phosphoprotein phosphatase activity	GO:0006796//phosphate-containing compound metabolic process	gi|299748023|ref|XP_001837406.2|/7.82653e-116/hypothetical protein CC1G_01318 [Coprinopsis cinerea okayama7||130]
GME6101_g	12	50	2.02	8.69	2.105	9.66954e-07	4.0804e-06	-	-	-	-	gi|170107795|ref|XP_001885107.1|/5.07594e-45/predicted protein [Laccaria bicolor S238N-H82]
GME8516_g	39	162	6.55	28.16	2.10408	1.38112e-13	1.23099e-12	-	-	-	-	gi|336373588|gb|EGO01926.1|/3.43163e-48/hypothetical protein SERLA73DRAFT_132602 [Serpula lacrymans var. lacrymans S7.3]
GME7380_g	87	361	14.62	62.74	2.10144	0	0	-	-	-	-	gi|170113045|ref|XP_001887723.1|/2.24082e-08/predicted protein [Laccaria bicolor S238N-H82]
GME11009_g	24	99	4.03	17.21	2.0944	3.66612e-10	2.14542e-09	-	-	-	-	gi|299742362|ref|XP_001832414.2|/9.49929e-92/hypothetical protein CC1G_07674 [Coprinopsis cinerea okayama7||130]
GME7996_g	33	136	5.55	23.64	2.09067	1.58851e-12	1.15445e-11	-	-	-	-	gi|336367732|gb|EGN96076.1|/1.90059e-148/hypothetical protein SERLA73DRAFT_124916 [Serpula lacrymans var. lacrymans S7.3]
GME6830_g	41	168	6.89	29.2	2.08339	1.3789e-13	1.23289e-12	-	-	-	GO:0006810//transport	gi|170099127|ref|XP_001880782.1|/3.14976e-150/amino acid transporter [Laccaria bicolor S238N-H82]
GME8658_g	70	286	11.76	49.71	2.07965	0	0	ko01100//Metabolic pathways;ko00562//Inositol phosphate metabolism;ko00521//Streptomycin biosynthesis;ko01120//Microbial metabolism in diverse environments;ko01110//Biosynthesis of secondary metabolites	-	GO:0003824//catalytic activity	GO:0008152//metabolic process	gi|170091948|ref|XP_001877196.1|/0/predicted protein [Laccaria bicolor S238N-H82]
GME11334_g	11	45	1.85	7.82	2.07964	2.86662e-06	1.14115e-05	ko04113//Meiosis - yeast;ko04110//Cell cycle;ko04111//Cell cycle - yeast	-	-	-	gi|299755496|ref|XP_001828703.2|/6.64889e-98/hypothetical protein CC1G_11293 [Coprinopsis cinerea okayama7||130]
GME10796_g	11	45	1.85	7.82	2.07964	2.86662e-06	1.14061e-05	-	-	-	-	gi|390605299|gb|EIN14690.1|/2.13404e-07/hypothetical protein PUNSTDRAFT_124124 [Punctularia strigosozonata HHB-11173 SS5]
GME564_g	25	102	4.2	17.73	2.07773	1.96376e-10	1.19185e-09	-	-	-	-	gi|392566507|gb|EIW59683.1|/1.524e-17/VAMP-associated protein [Trametes versicolor FP-101664 SS1]
GME5078_g	73	298	12.27	51.79	2.07754	0	0	ko00620//Pyruvate metabolism;ko01100//Metabolic pathways;ko00630//Glyoxylate and dicarboxylate metabolism;ko00710//Carbon fixation in photosynthetic organisms;ko01110//Biosynthesis of secondary metabolites;ko00020//Citrate cycle (TCA cycle)	-	GO:0016615//malate dehydrogenase activity	GO:0009060//aerobic respiration;GO:0005975//carbohydrate metabolic process;GO:0043648//dicarboxylic acid metabolic process	gi|299741021|ref|XP_001834158.2|/2.4189e-132/L-malate dehydrogenase [Coprinopsis cinerea okayama7||130]
GME7979_g	36	146	6.05	25.37	2.06812	3.64154e-13	2.87502e-12	ko01100//Metabolic pathways;ko00380//Tryptophan metabolism	-	-	-	gi|170094820|ref|XP_001878631.1|/0/predicted protein [Laccaria bicolor S238N-H82]
GME1867_g	17	69	2.86	11.99	2.06774	3.16758e-08	1.55418e-07	-	-	-	-	gi|170089043|ref|XP_001875744.1|/1.6836e-64/predicted protein [Laccaria bicolor S238N-H82]
GME2049_g	102	411	17.14	71.43	2.05916	0	0	-	-	-	-	gi|302689729|ref|XP_003034544.1|/3.07598e-74/hypothetical protein SCHCODRAFT_75500 [Schizophyllum commune H4-8]
GME6378_g	92	370	15.46	64.3	2.05628	0	0	-	-	-	-	gi|302675144|ref|XP_003027256.1|/2.52347e-07/hypothetical protein SCHCODRAFT_113593 [Schizophyllum commune H4-8]
GME3863_g	13	52	2.18	9.04	2.05199	6.8499e-07	2.93424e-06	-	GO:0043231//intracellular membrane-bounded organelle;GO:0044427//chromosomal part	GO:0017111//nucleoside-triphosphatase activity;GO:0032559	GO:0009207;GO:0006325//chromatin organization	gi|392593821|gb|EIW83146.1|/0/hypothetical protein CONPUDRAFT_81207 [Coniophora puteana RWD-64-598 SS2]
GME1694_g	47	188	7.9	32.67	2.04804	0	0	ko02010//ABC transporters;ko00760//Nicotinate and nicotinamide metabolism;ko01100//Metabolic pathways;ko00670//One carbon pool by folate;ko00900//Terpenoid backbone biosynthesis;ko00790//Folate biosynthesis;ko01110//Biosynthesis of secondary metabolites	-	-	-	gi|170115170|ref|XP_001888780.1|/3.3517e-76/predicted protein [Laccaria bicolor S238N-H82]
GME4120_g	11	44	1.85	7.65	2.04793	4.04266e-06	1.57682e-05	ko04141//Protein processing in endoplasmic reticulum;ko05134//Legionellosis;ko00230//Purine metabolism	-	GO:0000166//nucleotide binding	-	gi|395333590|gb|EJF65967.1|/2.32709e-66/AAA-domain-containing protein [Dichomitus squalens LYAD-421 SS1]
GME2623_g	11	44	1.85	7.65	2.04793	4.04266e-06	1.5761e-05	-	-	-	-	gi|299748936|ref|XP_001840254.2|/1.88183e-39/NWD2 [Coprinopsis cinerea okayama7||130]
GME7707_g	16	64	2.69	11.12	2.04748	6.79462e-08	3.24394e-07	-	-	-	-	gi|392596203|gb|EIW85526.1|/2.28065e-41/hypothetical protein CONPUDRAFT_142054 [Coniophora puteana RWD-64-598 SS2]
GME5560_g	22	88	3.7	15.29	2.04699	1.30535e-09	7.27353e-09	ko01100//Metabolic pathways;ko00564//Glycerophospholipid metabolism;ko00561//Glycerolipid metabolism	-	GO:0016747//transferase activity, transferring acyl groups other than amino-acyl groups	-	gi|299753469|ref|XP_001833295.2|/0/glycerol-3-phosphate O-acyltransferase [Coprinopsis cinerea okayama7||130]
GME8535_g	54	215	9.07	37.37	2.04271	4.06342e-14	4.07925e-13	-	-	-	-	gi|170091808|ref|XP_001877126.1|/1.47874e-170/predicted protein [Laccaria bicolor S238N-H82]
GME1449_g	602	2393	101.16	415.9	2.0396	6.5925e-13	4.98276e-12	-	-	-	-	gi|389740895|gb|EIM82085.1|/6.19912e-102/hypothetical protein STEHIDRAFT_141989 [Stereum hirsutum FP-91666 SS1]
GME5942_g	35	139	5.88	24.16	2.03873	5.59996e-13	4.28206e-12	-	-	-	-	gi|170090416|ref|XP_001876430.1|/2.52431e-75/predicted protein [Laccaria bicolor S238N-H82]
GME10422_g	29	115	4.87	19.99	2.03728	1.64817e-11	1.08303e-10	-	-	-	-	gi|238576762|ref|XP_002388152.1|/4.21386e-26/hypothetical protein MPER_12867 [Moniliophthora perniciosa FA553]
GME2240_g	54	214	9.07	37.19	2.03574	4.06342e-14	4.06964e-13	ko04011//MAPK signaling pathway - yeast;ko05218//Melanoma;ko04914//Progesterone-mediated oocyte maturation;ko04650//Natural killer cell mediated cytotoxicity;ko04730//Long-term depression;ko05221//Acute myeloid leukemia;ko04666//Fc gamma R-mediated phagocytosis;ko05211//Renal cell carcinoma;ko05020//Prion diseases;ko04660//T cell receptor signaling pathway;ko04540//Gap junction;ko04012//ErbB sign…	-	-	-	gi|336382995|gb|EGO24145.1|/4.53788e-71/hypothetical protein SERLADRAFT_470947 [Serpula lacrymans var. lacrymans S7.9]
GME186_g	24	95	4.03	16.51	2.03449	3.72008e-10	2.1755e-09	-	-	-	-	gi|403415864|emb|CCM02564.1|/2.94069e-119/predicted protein [Fibroporia radiculosa]
GME4143_g	18	71	3.02	12.34	2.03072	1.84737e-08	9.30027e-08	-	-	-	-	-
GME878_g	75	296	12.6	51.44	2.02947	0	0	ko00051//Fructose and mannose metabolism;ko00750//Vitamin B6 metabolism;ko01100//Metabolic pathways	-	GO:0042578//phosphoric ester hydrolase activity	GO:0006796//phosphate-containing compound metabolic process	gi|170093101|ref|XP_001877772.1|/1.06349e-85/predicted protein [Laccaria bicolor S238N-H82]
GME10437_g	34	134	5.71	23.29	2.02815	9.19486e-13	6.87633e-12	-	-	-	-	gi|403412874|emb|CCL99574.1|/6.90541e-69/predicted protein [Fibroporia radiculosa]
GME5806_g	139	544	23.36	94.55	2.01704	1.54321e-13	1.36261e-12	ko01100//Metabolic pathways;ko00564//Glycerophospholipid metabolism;ko00561//Glycerolipid metabolism;ko00565//Ether lipid metabolism	GO:0031224//intrinsic to membrane	-	-	gi|170106169|ref|XP_001884296.1|/0/predicted protein [Laccaria bicolor S238N-H82]
GME7638_g	34	133	5.71	23.11	2.01695	9.19708e-13	6.87195e-12	-	-	GO:0003824//catalytic activity	-	gi|170083969|ref|XP_001873208.1|/0/polysaccharide lyase family 8 protein [Laccaria bicolor S238N-H82]
GME1689_g	12	47	2.02	8.17	2.01598	2.29196e-06	9.25382e-06	-	-	-	-	gi|238578160|ref|XP_002388623.1|/1.34855e-65/hypothetical protein MPER_12332 [Moniliophthora perniciosa FA553]
GME7916_g	22	86	3.7	14.95	2.01455	1.35616e-09	7.54183e-09	-	-	-	-	gi|170094212|ref|XP_001878327.1|/1.10443e-160/predicted protein [Laccaria bicolor S238N-H82]
GME10032_g	32	125	5.38	21.72	2.01335	2.77422e-12	1.96741e-11	-	-	-	-	gi|336371408|gb|EGN99747.1|/4.45604e-93/hypothetical protein SERLA73DRAFT_52613 [Serpula lacrymans var. lacrymans S7.3]
GME436_g	20	78	3.36	13.56	2.01282	5.07786e-09	2.68848e-08	ko02010//ABC transporters;ko01120//Microbial metabolism in diverse environments;ko00350//Tyrosine metabolism	-	GO:0016829//lyase activity	-	gi|336374852|gb|EGO03188.1|/3.06633e-84/hypothetical protein SERLA73DRAFT_174646 [Serpula lacrymans var. lacrymans S7.3]
GME1049_g	18	70	3.02	12.17	2.01071	2.04886e-08	1.02539e-07	-	-	-	-	gi|336368838|gb|EGN97180.1|/1.10471e-67/hypothetical protein SERLA73DRAFT_183827 [Serpula lacrymans var. lacrymans S7.3]
GME9626_g	54	210	9.07	36.5	2.00872	4.06342e-14	4.06008e-13	-	GO:0031224//intrinsic to membrane	-	GO:0051234//establishment of localization	gi|170084397|ref|XP_001873422.1|/8.1414e-132/predicted protein [Laccaria bicolor S238N-H82]
GME5135_g	40	155	6.72	26.94	2.00322	1.17906e-13	1.0815e-12	-	-	-	-	gi|403416071|emb|CCM02771.1|/1.17567e-39/predicted protein [Fibroporia radiculosa]
Down-regulated genes (422)
Gene	RawIntensity-PYd21	RawIntensity-PYd15	TPM-PYd21	TPM-PYd15	log2 Ratio(PYd15/PYd21)	P-Value	FDR	Pathway	GO Component	GO Function	GO Process	blast nr
GME11940_g	1567	0	263.32	0.01	-14.6845	0	0	ko00624//Polycyclic aromatic hydrocarbon degradation;ko01100//Metabolic pathways;ko00627//Aminobenzoate degradation;ko00363//Bisphenol degradation;ko01110//Biosynthesis of secondary metabolites;ko00903//Limonene and pinene degradation;ko00945//Stilbenoid, diarylheptanoid and gingerol biosynthesis;ko01120//Microbial metabolism in diverse environments	-	-	-	gi|336365283|gb|EGN93634.1|/1.85596e-139/hypothetical protein SERLA73DRAFT_189361 [Serpula lacrymans var. lacrymans S7.3]
GME4853_g	1527	0	256.6	0.01	-14.6472	0	0	ko01100//Metabolic pathways;ko00310//Lysine degradation;ko00780//Biotin metabolism	-	GO:0008233//peptidase activity	-	gi|170085719|ref|XP_001874083.1|/2.80236e-95/deuterolysin M35 metalloprotease [Laccaria bicolor S238N-H82]
GME11748_g	1495	0	251.22	0.01	-14.6167	0	0	-	-	-	-	gi|169844531|ref|XP_001828986.1|/6.35717e-18/hypothetical protein CC1G_01666 [Coprinopsis cinerea okayama7||130]
GME4080_g	1071	0	179.97	0.01	-14.1355	0	0	ko01100//Metabolic pathways;ko00310//Lysine degradation;ko00780//Biotin metabolism	-	-	-	gi|299747566|ref|XP_001837124.2|/6.27343e-77/ThiJ/PfpI [Coprinopsis cinerea okayama7||130]
GME1236_g	392	0	65.87	0.01	-12.6854	7.00884e-116	1.83373e-114	-	-	-	-	-
GME9282_g	262	0	44.03	0.01	-12.1043	1.08892e-77	2.5507e-76	-	-	-	-	-
GME2612_g	232	0	38.99	0.01	-11.9289	7.0857e-69	1.60666e-67	-	-	-	-	gi|336369430|gb|EGN97771.1|/6.0413e-83/hypothetical protein SERLA73DRAFT_109000 [Serpula lacrymans var. lacrymans S7.3]
GME2589_g	229	0	38.48	0.01	-11.9099	5.39164e-68	1.20645e-66	-	-	-	-	gi|170116487|ref|XP_001889434.1|/9.38453e-62/predicted protein [Laccaria bicolor S238N-H82]
GME5445_g	197	0	33.1	0.01	-11.6926	1.35728e-58	2.91438e-57	-	GO:0044464//cell part	GO:0004197//cysteine-type endopeptidase activity	GO:0019538//protein metabolic process	gi|299745570|ref|XP_001831807.2|/0/hypothetical protein CC1G_05906 [Coprinopsis cinerea okayama7||130]
GME10173_g	164	0	27.56	0.01	-11.4284	6.7204e-49	1.38028e-47	ko01100//Metabolic pathways;ko00520//Amino sugar and nucleotide sugar metabolism;ko00500//Starch and sucrose metabolism;ko01110//Biosynthesis of secondary metabolites	-	-	-	gi|299738629|ref|XP_001834672.2|/2.48901e-127/hypothetical protein CC1G_05809 [Coprinopsis cinerea okayama7||130]
GME3264_g	155	0	26.05	0.01	-11.3471	2.96082e-46	5.9377e-45	-	-	GO:0005488//binding	-	gi|238594309|ref|XP_002393448.1|/1.46438e-15/hypothetical protein MPER_06820 [Moniliophthora perniciosa FA553]
GME11036_g	142	0	23.86	0.01	-11.2204	1.9523e-42	3.74727e-41	ko04141//Protein processing in endoplasmic reticulum	-	-	GO:0050896//response to stimulus	gi|169846538|ref|XP_001829984.1|/7.75644e-57/small heat shock protein [Coprinopsis cinerea okayama7||130]
GME2823_g	134	0	22.52	0.01	-11.137	4.37304e-40	8.1723e-39	-	-	-	-	gi|392585270|gb|EIW74610.1|/6.71441e-28/hypothetical protein CONPUDRAFT_77893 [Coniophora puteana RWD-64-598 SS2]
GME1474_g	6827	3	1147.22	0.52	-11.1073	0	0	ko00624//Polycyclic aromatic hydrocarbon degradation;ko01100//Metabolic pathways;ko00627//Aminobenzoate degradation;ko00363//Bisphenol degradation;ko01110//Biosynthesis of secondary metabolites;ko00903//Limonene and pinene degradation;ko00945//Stilbenoid, diarylheptanoid and gingerol biosynthesis;ko01120//Microbial metabolism in diverse environments;ko01100//Metabolic pathways;ko00360//Phenylalan…	-	-	-	gi|336373278|gb|EGO01616.1|/9.95338e-122/hypothetical protein SERLA73DRAFT_166166 [Serpula lacrymans var. lacrymans S7.3]
GME8958_g	129	0	21.68	0.01	-11.0821	1.28731e-38	2.38474e-37	ko04141//Protein processing in endoplasmic reticulum	-	-	GO:0050896//response to stimulus	gi|169846538|ref|XP_001829984.1|/4.32928e-58/small heat shock protein [Coprinopsis cinerea okayama7||130]
GME9415_g	129	0	21.68	0.01	-11.0821	1.28731e-38	2.37956e-37	-	-	-	-	-
GME3996_g	115	0	19.32	0.01	-10.9159	1.66954e-34	2.90308e-33	-	-	-	-	-
GME6931_g	96	0	16.13	0.01	-10.6555	6.37394e-29	1.00927e-27	-	-	-	-	gi|170115053|ref|XP_001888722.1|/8.20485e-57/predicted protein [Laccaria bicolor S238N-H82]
GME1642_g	91	0	15.29	0.01	-10.5784	1.87632e-27	2.9167e-26	-	GO:0044464//cell part	GO:0004197//cysteine-type endopeptidase activity	GO:0019538//protein metabolic process	gi|299745570|ref|XP_001831807.2|/0/hypothetical protein CC1G_05906 [Coprinopsis cinerea okayama7||130]
GME10812_g	83	0	13.95	0.01	-10.446	4.20284e-25	6.37019e-24	-	-	GO:0003676//nucleic acid binding	-	gi|238576056|ref|XP_002387896.1|/5.02133e-137/hypothetical protein MPER_13155 [Moniliophthora perniciosa FA553]
GME3065_g	82	0	13.78	0.01	-10.4284	8.26652e-25	1.24188e-23	ko00624//Polycyclic aromatic hydrocarbon degradation;ko01100//Metabolic pathways;ko00627//Aminobenzoate degradation;ko00363//Bisphenol degradation;ko01110//Biosynthesis of secondary metabolites;ko00903//Limonene and pinene degradation;ko00945//Stilbenoid, diarylheptanoid and gingerol biosynthesis;ko01120//Microbial metabolism in diverse environments	-	GO:0046872//metal ion binding	-	gi|299746194|ref|XP_001837807.2|/2.01524e-117/cytochrome P450 [Coprinopsis cinerea okayama7||130]
GME4027_g	82	0	13.78	0.01	-10.4284	8.26652e-25	1.23969e-23	ko01100//Metabolic pathways;ko00970//Aminoacyl-tRNA biosynthesis;ko01110//Biosynthesis of secondary metabolites;ko00130//Ubiquinone and other terpenoid-quinone biosynthesis	GO:0044424//intracellular part	GO:0004812//aminoacyl-tRNA ligase activity;GO:0032559	GO:0006418//tRNA aminoacylation for protein translation	gi|395323836|gb|EJF56291.1|/7.94537e-72/tryptophanyl-tRNA synthetase [Dichomitus squalens LYAD-421 SS1]
GME2398_g	81	0	13.61	0.01	-10.4105	1.62593e-24	2.42549e-23	ko03008//Ribosome biogenesis in eukaryotes	-	-	-	gi|170113228|ref|XP_001887814.1|/2.98264e-94/predicted protein [Laccaria bicolor S238N-H82]
GME7322_g	76	0	12.77	0.01	-10.3185	4.7863e-23	6.9332e-22	-	-	-	-	gi|12862434|dbj|BAB32470.1|/2.64104e-96/Pol-like protein Pol-2 [Tricholoma matsutake]
GME7131_g	75	0	12.6	0.01	-10.2992	9.41414e-23	1.35217e-21	ko04260//Cardiac muscle contraction;ko05416//Viral myocarditis;ko05410//Hypertrophic cardiomyopathy (HCM);ko04270//Vascular smooth muscle contraction;ko04530//Tight junction;ko05132//Salmonella infection;ko04810//Regulation of actin cytoskeleton;ko05414//Dilated cardiomyopathy	-	-	-	gi|336375331|gb|EGO03667.1|/2.31632e-67/hypothetical protein SERLA73DRAFT_69517 [Serpula lacrymans var. lacrymans S7.3]
GME3201_g	74	0	12.44	0.01	-10.2808	1.85165e-22	2.64615e-21	-	-	-	-	gi|336374703|gb|EGO03040.1|/6.49839e-08/hypothetical protein SERLA73DRAFT_158694 [Serpula lacrymans var. lacrymans S7.3]
GME2033_g	72	0	12.1	0.01	-10.2408	7.1634e-22	1.0118e-20	ko04141//Protein processing in endoplasmic reticulum	-	-	-	gi|392566313|gb|EIW59489.1|/1.94213e-46/HSP20-like chaperone [Trametes versicolor FP-101664 SS1]
GME3085_g	72	0	12.1	0.01	-10.2408	7.1634e-22	1.01012e-20	ko04141//Protein processing in endoplasmic reticulum;ko05134//Legionellosis;ko00230//Purine metabolism	-	GO:0000166//nucleotide binding	-	gi|392595692|gb|EIW85015.1|/2.80935e-82/AAA-domain-containing protein [Coniophora puteana RWD-64-598 SS2]
GME10290_g	67	0	11.26	0.01	-10.137	2.10872e-20	2.88735e-19	-	-	-	GO:0008152//metabolic process	gi|392584699|gb|EIW74043.1|/1.00756e-139/Dus-domain-containing protein [Coniophora puteana RWD-64-598 SS2]
GME9066_g	67	0	11.26	0.01	-10.137	2.10872e-20	2.88271e-19	ko00230//Purine metabolism	GO:0016020//membrane	GO:0042625//ATPase activity, coupled to transmembrane movement of ions;GO:0000166//nucleotide binding	GO:0006810//transport;GO:0008152//metabolic process	gi|169860915|ref|XP_001837092.1|/0/sodium transport ATPase [Coprinopsis cinerea okayama7||130]
GME10295_g	66	0	11.09	0.01	-10.115	4.1476e-20	5.60684e-19	-	-	-	-	gi|238582519|ref|XP_002389957.1|/3.50316e-48/hypothetical protein MPER_10847 [Moniliophthora perniciosa FA553]
GME4851_g	63	0	10.59	0.01	-10.0485	3.15598e-19	4.17345e-18	ko02010//ABC transporters;ko04976//Bile secretion	-	GO:0017111//nucleoside-triphosphatase activity;GO:0000166//nucleotide binding	GO:0009987//cellular process;GO:0006810//transport	gi|170089911|ref|XP_001876178.1|/0/predicted protein [Laccaria bicolor S238N-H82]
GME11527_g	61	0	10.25	0.01	-10.0014	1.22094e-18	1.59718e-17	-	-	-	-	-
GME8910_g	60	0	10.08	0.01	-9.97728	2.40146e-18	3.10328e-17	-	-	-	-	gi|393216551|gb|EJD02041.1|/0/hypothetical protein FOMMEDRAFT_141224 [Fomitiporia mediterranea MF3/22]
GME6157_g	60	0	10.08	0.01	-9.97728	2.40146e-18	3.09858e-17	-	-	-	-	gi|390605280|gb|EIN14671.1|/1.71712e-14/hypothetical protein PUNSTDRAFT_118091 [Punctularia strigosozonata HHB-11173 SS5]
GME5727_g	59	0	9.91	0.01	-9.95274	4.7234e-18	5.99449e-17	-	-	-	-	gi|336381317|gb|EGO22469.1|/2.05951e-07/hypothetical protein SERLADRAFT_409958 [Serpula lacrymans var. lacrymans S7.9]
GME10723_g	56	0	9.41	0.01	-9.87805	3.59412e-17	4.45493e-16	-	-	-	-	gi|12862434|dbj|BAB32470.1|/7.08748e-107/Pol-like protein Pol-2 [Tricholoma matsutake]
GME5216_g	56	0	9.41	0.01	-9.87805	3.59412e-17	4.44844e-16	-	-	-	-	gi|169852410|ref|XP_001832889.1|/2.28752e-76/hypothetical protein CC1G_10565 [Coprinopsis cinerea okayama7||130]
GME5731_g	3819	4	641.75	0.7	-9.84044	0	0	ko03010//Ribosome	GO:0030529//ribonucleoprotein complex	GO:0005198//structural molecule activity	GO:0010467//gene expression	gi|336366147|gb|EGN94495.1|/3.56542e-55/hypothetical protein SERLA73DRAFT_144271 [Serpula lacrymans var. lacrymans S7.3]
GME9363_g	52	0	8.74	0.01	-9.77149	5.37912e-16	6.01034e-15	-	-	-	-	gi|299741242|ref|XP_001834322.2|/1.69485e-19/hypothetical protein CC1G_11731 [Coprinopsis cinerea okayama7||130]
GME9875_g	52	0	8.74	0.01	-9.77149	5.37912e-16	6.00245e-15	-	-	-	-	gi|336368117|gb|EGN96461.1|/2.15761e-12/hypothetical protein SERLA73DRAFT_162245 [Serpula lacrymans var. lacrymans S7.3]
GME5091_g	48	0	8.07	0.01	-9.65642	8.05062e-15	8.58901e-14	-	-	-	-	gi|238581974|ref|XP_002389784.1|/1.61649e-12/hypothetical protein MPER_11041 [Moniliophthora perniciosa FA553]
GME3694_g	48	0	8.07	0.01	-9.65642	8.05062e-15	8.57825e-14	-	-	-	-	gi|336379004|gb|EGO20160.1|/5.67013e-43/hypothetical protein SERLADRAFT_417944 [Serpula lacrymans var. lacrymans S7.9]
GME10718_g	46	0	7.73	0.01	-9.59432	3.1145e-14	3.15269e-13	-	-	-	-	gi|302674982|ref|XP_003027175.1|/9.01853e-15/hypothetical protein SCHCODRAFT_238152 [Schizophyllum commune H4-8]
GME8268_g	45	0	7.56	0.01	-9.56224	6.12588e-14	5.98029e-13	-	-	GO:0003676//nucleic acid binding	GO:0009987//cellular process	gi|238576601|ref|XP_002388093.1|/0/hypothetical protein MPER_12935 [Moniliophthora perniciosa FA553]
GME9685_g	45	0	7.56	0.01	-9.56224	6.12588e-14	5.97344e-13	-	-	-	-	gi|376372661|gb|AFB35535.1|/0/mating-type protein beta1-1 [Volvariella volvacea]
GME9667_g	44	0	7.39	0.01	-9.52943	1.20489e-13	1.10163e-12	ko03008//Ribosome biogenesis in eukaryotes;ko03013//RNA transport	-	-	-	gi|299756212|ref|XP_001829172.2|/5.74026e-38/hypothetical protein CC1G_01852 [Coprinopsis cinerea okayama7||130]
GME10743_g	44	0	7.39	0.01	-9.52943	1.20489e-13	1.10045e-12	-	-	-	-	gi|170117808|ref|XP_001890089.1|/2.62831e-52/predicted protein [Laccaria bicolor S238N-H82]
GME4016_g	44	0	7.39	0.01	-9.52943	1.20489e-13	1.09927e-12	-	-	-	-	gi|242209630|ref|XP_002470661.1|/1.19901e-52/predicted protein [Postia placenta Mad-698-R]
GME2469_g	43	0	7.23	0.01	-9.49785	2.36988e-13	1.9698e-12	-	-	-	-	gi|170116445|ref|XP_001889413.1|/0/predicted protein [Laccaria bicolor S238N-H82]
GME1270_g	42	0	7.06	0.01	-9.46352	4.6613e-13	3.61304e-12	-	-	GO:0005488//binding	-	gi|238576601|ref|XP_002388093.1|/1.417e-110/hypothetical protein MPER_12935 [Moniliophthora perniciosa FA553]
GME3717_g	666	2	111.92	0.35	-8.3209	1.21267e-191	3.55564e-190	ko04141//Protein processing in endoplasmic reticulum	-	-	GO:0050896//response to stimulus	gi|169846538|ref|XP_001829984.1|/2.31617e-56/small heat shock protein [Coprinopsis cinerea okayama7||130]
GME1105_g	740	3	124.35	0.52	-7.90168	3.3248e-211	9.98967e-210	ko03050//Proteasome	GO:0005839//proteasome core complex;GO:0043231//intracellular membrane-bounded organelle	GO:0004175//endopeptidase activity	GO:0019941//modification-dependent protein catabolic process	gi|336373148|gb|EGO01486.1|/1.33237e-113/hypothetical protein SERLA73DRAFT_176788 [Serpula lacrymans var. lacrymans S7.3]
GME11035_g	704	3	118.3	0.52	-7.82972	1.07948e-200	3.19821e-199	ko04141//Protein processing in endoplasmic reticulum	-	-	GO:0050896//response to stimulus	gi|169846538|ref|XP_001829984.1|/3.34454e-55/small heat shock protein [Coprinopsis cinerea okayama7||130]
GME10965_g	974	6	163.67	1.04	-7.29806	1.27143e-273	4.01895e-272	-	-	-	-	gi|242218566|ref|XP_002475072.1|/2.30585e-41/hypothetical protein POSPLDRAFT_96091 [Postia placenta Mad-698-R]
GME3906_g	1699	16	285.5	2.78	-6.68226	0	0	-	-	GO:0005488//binding	GO:0009987//cellular process	gi|170106221|ref|XP_001884322.1|/1.03222e-71/predicted protein [Laccaria bicolor S238N-H82]
GME366_g	538	6	90.41	1.04	-6.44183	4.5443e-147	1.25455e-145	-	-	-	-	gi|170087070|ref|XP_001874758.1|/4.63407e-23/predicted protein [Laccaria bicolor S238N-H82]
GME3901_g	249	3	41.84	0.52	-6.33023	2.30326e-68	5.16745e-67	-	-	-	-	gi|116202859|ref|XP_001227241.1|/7.90625e-100/hypothetical protein CHGG_09314 [Chaetomium globosum CBS 148.51]
GME10727_g	808	10	135.78	1.74	-6.28604	1.27055e-218	3.87221e-217	-	-	-	-	gi|170087260|ref|XP_001874853.1|/7.88371e-111/glycoside hydrolase family 5 protein [Laccaria bicolor S238N-H82]
GME3228_g	160	2	26.89	0.35	-6.26357	3.25028e-44	6.41233e-43	ko00982//Drug metabolism - cytochrome P450;ko01120//Microbial metabolism in diverse environments;ko00680//Methane metabolism	-	GO:0016491//oxidoreductase activity	-	gi|299738610|ref|XP_001834659.2|/0/hypothetical protein CC1G_05796 [Coprinopsis cinerea okayama7||130]
GME3054_g	218	3	36.63	0.52	-6.13837	1.99178e-59	4.32044e-58	-	-	-	-	gi|395326584|gb|EJF58992.1|/1.7732e-40/hypothetical protein DICSQDRAFT_182227 [Dichomitus squalens LYAD-421 SS1]
GME1384_g	246	4	41.34	0.7	-5.88404	5.2382e-66	1.16294e-64	-	-	-	-	gi|170109101|ref|XP_001885758.1|/8.21606e-59/predicted protein [Laccaria bicolor S238N-H82]
GME8949_g	7868	136	1322.15	23.64	-5.80551	0	0	ko04141//Protein processing in endoplasmic reticulum	-	-	GO:0050896//response to stimulus	gi|348599982|dbj|BAL02931.1|/1.42321e-56/small heat shock protein [Pholiota nameko]
GME10226_g	107	2	17.98	0.35	-5.68289	5.5214e-29	8.75904e-28	-	-	-	-	gi|367048783|ref|XP_003654771.1|/8.60134e-14/hypothetical protein THITE_2117974 [Thielavia terrestris NRRL 8126]
GME449_g	1000	20	168.04	3.48	-5.59357	6.04894e-259	1.89794e-257	-	-	-	-	-
GME3086_g	188	4	31.59	0.7	-5.49597	1.99992e-49	4.1275e-48	-	-	-	-	gi|299745748|ref|XP_001831924.2|/2.18558e-29/hypothetical protein CC1G_12899 [Coprinopsis cinerea okayama7||130]
GME6674_g	2871	67	482.45	11.64	-5.37322	0	0	-	-	-	-	gi|170097543|ref|XP_001879991.1|/2.69275e-109/predicted protein [Laccaria bicolor S238N-H82]
GME10675_g	81	2	13.61	0.35	-5.28117	1.40422e-21	1.95419e-20	ko00624//Polycyclic aromatic hydrocarbon degradation;ko01100//Metabolic pathways;ko00627//Aminobenzoate degradation;ko00363//Bisphenol degradation;ko01110//Biosynthesis of secondary metabolites;ko00903//Limonene and pinene degradation;ko00945//Stilbenoid, diarylheptanoid and gingerol biosynthesis;ko01120//Microbial metabolism in diverse environments;ko01100//Metabolic pathways;ko00590//Arachidoni…	-	GO:0046872//metal ion binding	-	gi|170106656|ref|XP_001884539.1|/1.3404e-158/predicted protein [Laccaria bicolor S238N-H82]
GME7924_g	80	2	13.44	0.35	-5.26303	2.697e-21	3.74104e-20	-	-	-	-	gi|393231266|gb|EJD38860.1|/1.43339e-94/DNA/RNA polymerase [Auricularia delicata TFB-10046 SS5]
GME9684_g	194	5	32.6	0.87	-5.22771	7.72018e-50	1.59719e-48	-	GO:0044429//mitochondrial part	GO:0004175//endopeptidase activity;GO:0043169//cation binding	GO:0019538//protein metabolic process	gi|365940839|gb|AEX07902.1|/0/MIP protein [Volvariella volvacea]
GME5474_g	794	22	133.43	3.82	-5.12637	7.38212e-198	2.17952e-196	-	-	-	-	-
GME10789_g	600	17	100.83	2.95	-5.09507	2.036e-149	5.65755e-148	-	-	GO:0003677//DNA binding	GO:0006351//transcription, DNA-dependent	gi|170103164|ref|XP_001882797.1|/4.76833e-72/predicted protein [Laccaria bicolor S238N-H82]
GME7443_g	1121	32	188.37	5.56	-5.08234	1.60846e-277	5.10327e-276	-	-	-	-	gi|393219007|gb|EJD04495.1|/8.34626e-64/hypothetical protein FOMMEDRAFT_167667 [Fomitiporia mediterranea MF3/22]
GME1992_g	169	5	28.4	0.87	-5.02873	8.72384e-43	1.68206e-41	-	-	-	-	gi|170090141|ref|XP_001876293.1|/5.00432e-25/predicted protein [Laccaria bicolor S238N-H82]
GME519_g	66	2	11.09	0.35	-4.98576	2.4239e-17	3.02206e-16	-	-	-	-	gi|170099341|ref|XP_001880889.1|/3.02852e-87/predicted protein [Laccaria bicolor S238N-H82]
GME6215_g	195	6	32.77	1.04	-4.97772	6.69668e-49	1.37874e-47	-	-	-	-	gi|170104914|ref|XP_001883670.1|/1.19606e-42/predicted protein [Laccaria bicolor S238N-H82]
GME7876_g	421	13	70.75	2.26	-4.96834	5.73104e-104	1.43749e-102	ko05166//HTLV-I infection;ko03022//Basal transcription factors;ko05016//Huntington's disease;ko05169//Epstein-Barr virus infection;ko05168//Herpes simplex infection	-	GO:0003676//nucleic acid binding;GO:0001071//nucleic acid binding transcription factor activity	GO:0006352//DNA-dependent transcription, initiation	gi|336367903|gb|EGN96247.1|/5.58525e-105/hypothetical protein SERLA73DRAFT_76226 [Serpula lacrymans var. lacrymans S7.3]
GME8338_g	451	14	75.79	2.43	-4.96298	3.4708e-111	8.97028e-110	-	-	-	-	gi|299747454|ref|XP_001837047.2|/2.4971e-59/hypothetical protein CC1G_00183 [Coprinopsis cinerea okayama7||130]
GME2887_g	226	7	37.98	1.22	-4.96029	2.04608e-56	4.36036e-55	-	-	-	-	gi|170103092|ref|XP_001882761.1|/3.95183e-24/predicted protein [Laccaria bicolor S238N-H82]
GME10724_g	286	9	48.06	1.56	-4.94522	7.13504e-71	1.63529e-69	-	-	-	-	gi|395334923|gb|EJF67299.1|/5.9041e-08/hypothetical protein DICSQDRAFT_47142 [Dichomitus squalens LYAD-421 SS1]
GME456_g	95	3	15.96	0.52	-4.93981	2.41224e-24	3.57339e-23	-	-	-	-	-
GME9840_g	95	3	15.96	0.52	-4.93981	2.41224e-24	3.56718e-23	ko01100//Metabolic pathways;ko00500//Starch and sucrose metabolism	-	GO:0016798//hydrolase activity, acting on glycosyl bonds;GO:0043167//ion binding	GO:0044238//primary metabolic process	gi|403411787|emb|CCL98487.1|/0/predicted protein [Fibroporia radiculosa]
GME8161_g	679	22	114.1	3.82	-4.90058	1.53115e-165	4.32537e-164	ko01100//Metabolic pathways;ko00564//Glycerophospholipid metabolism	-	-	-	gi|299749914|ref|XP_001836422.2|/1.19862e-72/hypothetical protein CC1G_07069 [Coprinopsis cinerea okayama7||130]
GME8227_g	618	20	103.85	3.48	-4.89927	7.78972e-151	2.18601e-149	-	-	-	-	gi|392564105|gb|EIW57283.1|/9.79873e-113/DnaJ-domain-containing protein [Trametes versicolor FP-101664 SS1]
GME8678_g	667	22	112.08	3.82	-4.87481	3.49436e-162	9.83859e-161	-	-	GO:0005488//binding	-	gi|302696965|ref|XP_003038161.1|/2.28114e-125/hypothetical protein SCHCODRAFT_230844 [Schizophyllum commune H4-8]
GME6314_g	143	5	24.03	0.87	-4.78768	1.6893e-35	2.9801e-34	ko00624//Polycyclic aromatic hydrocarbon degradation;ko01100//Metabolic pathways;ko00627//Aminobenzoate degradation;ko00363//Bisphenol degradation;ko01110//Biosynthesis of secondary metabolites;ko00903//Limonene and pinene degradation;ko00945//Stilbenoid, diarylheptanoid and gingerol biosynthesis;ko01120//Microbial metabolism in diverse environments	-	GO:0046872//metal ion binding	-	gi|299746194|ref|XP_001837807.2|/1.42806e-153/cytochrome P450 [Coprinopsis cinerea okayama7||130]
GME4716_g	74646	2645	12543.6	459.69	-4.77015	0	0	-	-	-	-	gi|392591926|gb|EIW81253.1|/7.96423e-11/hypothetical protein CONPUDRAFT_104558 [Coniophora puteana RWD-64-598 SS2]
GME11834_g	56	2	9.41	0.35	-4.74877	1.53995e-14	1.59686e-13	ko01100//Metabolic pathways;ko00520//Amino sugar and nucleotide sugar metabolism;ko00500//Starch and sucrose metabolism;ko01110//Biosynthesis of secondary metabolites	-	-	-	gi|392559558|gb|EIW52742.1|/2.55489e-75/hypothetical protein TRAVEDRAFT_53180 [Trametes versicolor FP-101664 SS1]
GME9303_g	56	2	9.41	0.35	-4.74877	1.53995e-14	1.59491e-13	-	-	-	-	gi|299740001|ref|XP_002910268.1|/1.58011e-66/shuttle craft protein [Coprinopsis cinerea okayama7||130]
GME7320_g	54	2	9.07	0.35	-4.69568	5.56418e-14	5.45072e-13	-	-	-	-	gi|170112350|ref|XP_001887377.1|/3.91154e-41/predicted protein [Laccaria bicolor S238N-H82]
GME6189_g	188	7	31.59	1.22	-4.69451	8.52984e-46	1.70256e-44	-	-	-	-	gi|390595896|gb|EIN05300.1|/7.63397e-118/hypothetical protein PUNSTDRAFT_137982 [Punctularia strigosozonata HHB-11173 SS5]
GME4727_g	107	4	17.98	0.7	-4.68289	1.4093e-26	2.17482e-25	-	-	-	-	gi|336369052|gb|EGN97394.1|/1.32386e-20/hypothetical protein SERLA73DRAFT_110601 [Serpula lacrymans var. lacrymans S7.3]
GME7194_g	609	24	102.34	4.17	-4.61718	9.50082e-144	2.60598e-142	ko04141//Protein processing in endoplasmic reticulum	-	-	-	gi|390602401|gb|EIN11794.1|/4.50093e-39/small heat shock protein [Punctularia strigosozonata HHB-11173 SS5]
GME4854_g	100	4	16.8	0.7	-4.58496	1.23854e-24	1.85411e-23	-	-	-	-	-
GME11657_g	49	2	8.23	0.35	-4.55547	1.36577e-12	1.00114e-11	-	-	-	-	gi|336370165|gb|EGN98506.1|/3.68827e-57/hypothetical protein SERLA73DRAFT_183555 [Serpula lacrymans var. lacrymans S7.3]
GME3062_g	49	2	8.23	0.35	-4.55547	1.36577e-12	1.00027e-11	ko00052//Galactose metabolism	-	GO:0046872//metal ion binding	GO:0006351//transcription, DNA-dependent	gi|299739301|ref|XP_001835192.2|/0/nuclear protein [Coprinopsis cinerea okayama7||130]
GME6170_g	72	3	12.1	0.52	-4.54035	6.24008e-18	7.86065e-17	ko01100//Metabolic pathways;ko00520//Amino sugar and nucleotide sugar metabolism;ko00500//Starch and sucrose metabolism;ko01110//Biosynthesis of secondary metabolites	-	GO:0016787//hydrolase activity	GO:0044238//primary metabolic process	gi|116199031|ref|XP_001225327.1|/1.9132e-74/hypothetical protein CHGG_07671 [Chaetomium globosum CBS 148.51]
GME6358_g	48	2	8.07	0.35	-4.52714	2.5851e-12	1.84251e-11	ko04110//Cell cycle;ko04111//Cell cycle - yeast;ko04113//Meiosis - yeast	-	GO:0005488//binding	-	gi|170087342|ref|XP_001874894.1|/0/predicted protein [Laccaria bicolor S238N-H82]
GME2415_g	48	2	8.07	0.35	-4.52714	2.5851e-12	1.84096e-11	-	-	-	-	-
GME9687_g	421	18	70.75	3.13	-4.4985	2.61226e-98	6.45699e-97	-	-	-	-	gi|376372663|gb|AFB35537.1|/1.17438e-73/hypothetical protein [Volvariella volvacea]
GME2426_g	139	6	23.36	1.04	-4.48938	2.65736e-33	4.51009e-32	-	-	-	-	-
GME10161_g	3112	134	522.95	23.29	-4.48889	0	0	-	-	-	-	gi|336381626|gb|EGO22777.1|/0/hypothetical protein SERLADRAFT_371071 [Serpula lacrymans var. lacrymans S7.9]
GME7350_g	46	2	7.73	0.35	-4.46504	9.24016e-12	6.20609e-11	-	-	-	-	gi|393212182|gb|EJC97684.1|/1.18255e-14/hypothetical protein FOMMEDRAFT_171606 [Fomitiporia mediterranea MF3/22]
GME1735_g	46	2	7.73	0.35	-4.46504	9.24016e-12	6.20119e-11	-	-	-	-	gi|170117263|ref|XP_001889819.1|/0/predicted protein [Laccaria bicolor S238N-H82]
GME7458_g	45	2	7.56	0.35	-4.43296	1.74485e-11	1.14302e-10	-	-	-	-	gi|395329318|gb|EJF61705.1|/1.72014e-21/hypothetical protein DICSQDRAFT_180445 [Dichomitus squalens LYAD-421 SS1]
GME3827_g	155	7	26.05	1.22	-4.41633	1.14581e-36	2.06416e-35	-	-	-	-	gi|390604000|gb|EIN13391.1|/5.0905e-09/hypothetical protein PUNSTDRAFT_139948 [Punctularia strigosozonata HHB-11173 SS5]
GME10023_g	154	7	25.88	1.22	-4.40688	2.15756e-36	3.87041e-35	-	-	-	-	gi|302686074|ref|XP_003032717.1|/9.52864e-34/hypothetical protein SCHCODRAFT_108023 [Schizophyllum commune H4-8]
GME9598_g	6812	311	1144.7	54.05	-4.40453	0	0	ko01100//Metabolic pathways;ko00624//Polycyclic aromatic hydrocarbon degradation;ko00340//Histidine metabolism;ko00540//Lipopolysaccharide biosynthesis;ko01120//Microbial metabolism in diverse environments;ko00350//Tyrosine metabolism	-	GO:0008168//methyltransferase activity	-	gi|170085601|ref|XP_001874024.1|/0/predicted protein [Laccaria bicolor S238N-H82]
GME2724_g	44	2	7.39	0.35	-4.40015	3.29206e-11	2.11903e-10	-	-	-	-	gi|171684291|ref|XP_001907087.1|/1.26844e-17/hypothetical protein [Podospora anserina S mat+]
GME7598_g	150	7	25.21	1.22	-4.36904	2.70496e-35	4.76196e-34	ko00930//Caprolactam degradation;ko01120//Microbial metabolism in diverse environments	-	GO:0016491//oxidoreductase activity	-	gi|170093614|ref|XP_001878028.1|/3.5865e-105/predicted protein [Laccaria bicolor S238N-H82]
GME11765_g	190	9	31.93	1.56	-4.35529	3.2e-44	6.32781e-43	-	-	-	-	gi|299737972|ref|XP_001841550.2|/2.8513e-120/hypothetical protein CC1G_13488 [Coprinopsis cinerea okayama7||130]
GME3951_g	457	22	76.8	3.82	-4.32946	5.14594e-104	1.29455e-102	-	-	-	-	gi|389746533|gb|EIM87713.1|/6.3332e-22/hypothetical protein STEHIDRAFT_121331 [Stereum hirsutum FP-91666 SS1]
GME8455_g	124	6	20.84	1.04	-4.3247	3.51358e-29	5.58429e-28	ko00642//Ethylbenzene degradation;ko01100//Metabolic pathways;ko00627//Aminobenzoate degradation;ko00051//Fructose and mannose metabolism;ko00362//Benzoate degradation;ko00240//Pyrimidine metabolism;ko00903//Limonene and pinene degradation;ko01120//Microbial metabolism in diverse environments;ko00350//Tyrosine metabolism	-	GO:0004672//protein kinase activity;GO:0000166//nucleotide binding	-	gi|336386659|gb|EGO27805.1|/6.4996e-93/serine/threonine protein kinase, negative regulator of sexual conjugation and meiosis [Serpula lacrymans var. lacrymans S7.9]
GME11340_g	1840	89	309.2	15.47	-4.321	0	0	-	-	GO:0016462//pyrophosphatase activity;GO:0032559	GO:0050896//response to stimulus;GO:0043170	gi|170085149|ref|XP_001873798.1|/0/predicted protein [Laccaria bicolor S238N-H82]
GME4865_g	83	4	13.95	0.7	-4.31677	6.01202e-20	8.07586e-19	ko01100//Metabolic pathways;ko00520//Amino sugar and nucleotide sugar metabolism;ko00500//Starch and sucrose metabolism;ko01110//Biosynthesis of secondary metabolites;ko01100//Metabolic pathways;ko00500//Starch and sucrose metabolism	-	GO:0004553//hydrolase activity, hydrolyzing O-glycosyl compounds	GO:0000272//polysaccharide catabolic process	gi|49333363|gb|AAT64006.1|/0/cellobiohydrolase I-I [Volvariella volvacea]
GME3988_g	41	2	6.89	0.35	-4.29908	2.19904e-10	1.31958e-09	-	-	-	-	gi|392591842|gb|EIW81169.1|/3.59234e-114/hypothetical protein CONPUDRAFT_104388 [Coniophora puteana RWD-64-598 SS2]
GME7065_g	181	9	30.42	1.56	-4.2854	9.25718e-42	1.76885e-40	-	-	GO:0016788//hydrolase activity, acting on ester bonds	-	gi|6863036|dbj|BAA90482.1|/7.62025e-98/nuclease Le1 [Lentinula edodes]
GME785_g	7133	357	1198.64	62.05	-4.27182	0	0	ko00624//Polycyclic aromatic hydrocarbon degradation;ko01100//Metabolic pathways;ko00627//Aminobenzoate degradation;ko00363//Bisphenol degradation;ko01110//Biosynthesis of secondary metabolites;ko00903//Limonene and pinene degradation;ko00945//Stilbenoid, diarylheptanoid and gingerol biosynthesis;ko01120//Microbial metabolism in diverse environments;ko01100//Metabolic pathways;ko00590//Arachidoni…	-	GO:0016491//oxidoreductase activity;GO:0005506//iron ion binding	-	gi|169847405|ref|XP_001830414.1|/0/hypothetical protein CC1G_02050 [Coprinopsis cinerea okayama7||130]
GME2476_g	40	2	6.72	0.35	-4.26303	4.13336e-10	2.40726e-09	-	-	-	-	gi|170101354|ref|XP_001881894.1|/5.65132e-10/predicted protein [Laccaria bicolor S238N-H82]
GME6362_g	873	44	146.7	7.65	-4.26127	2.99754e-195	8.81941e-194	-	-	-	-	-
GME2867_g	59	3	9.91	0.52	-4.2523	2.34538e-14	2.40274e-13	-	-	-	-	gi|170116962|ref|XP_001889670.1|/6.73576e-72/predicted protein [Laccaria bicolor S238N-H82]
GME178_g	79	4	13.28	0.7	-4.24576	7.46352e-19	9.8087e-18	-	-	-	-	-
GME8830_g	97	5	16.3	0.87	-4.22771	8.58728e-23	1.23549e-21	ko05020//Prion diseases	-	-	-	gi|169861357|ref|XP_001837313.1|/5.93029e-135/chaperone [Coprinopsis cinerea okayama7||130]
GME5984_g	749	39	125.86	6.78	-4.21439	1.676e-166	4.75034e-165	-	-	-	-	-
GME8244_g	77	4	12.94	0.7	-4.20834	2.62082e-18	3.36629e-17	-	-	-	-	gi|353234770|emb|CCA66792.1|/1.23057e-41/hypothetical protein PIIN_00471 [Piriformospora indica DSM 11827]
GME1520_g	287	15	48.23	2.61	-4.20781	1.10281e-64	2.42932e-63	-	-	-	-	-
GME3871_g	229	12	38.48	2.09	-4.20253	7.24142e-52	1.51287e-50	-	-	-	-	gi|170113984|ref|XP_001888190.1|/4.24339e-26/predicted protein [Laccaria bicolor S238N-H82]
GME7237_g	313	17	52.6	2.95	-4.15628	8.72472e-70	1.98891e-68	-	-	-	-	gi|299740819|ref|XP_002910369.1|/1.21225e-104/hypothetical protein CC1G_09435 [Coprinopsis cinerea okayama7||130]
GME8441_g	110	6	18.48	1.04	-4.15131	2.295e-25	3.4972e-24	-	-	-	-	gi|299747829|ref|XP_001837278.2|/2.68703e-23/hypothetical protein CC1G_00414 [Coprinopsis cinerea okayama7||130]
GME4453_g	73	4	12.27	0.7	-4.13164	3.20806e-17	3.98803e-16	ko04910//Insulin signaling pathway;ko00500//Starch and sucrose metabolism	-	GO:0048037//cofactor binding;GO:0016758//transferase activity, transferring hexosyl groups	GO:0044238//primary metabolic process	gi|299741449|ref|XP_001834468.2|/0/glycogen phosphorylase [Coprinopsis cinerea okayama7||130]
GME1209_g	126	7	21.17	1.22	-4.11707	9.4486e-29	1.49056e-27	-	-	-	-	gi|389746533|gb|EIM87713.1|/2.98822e-21/hypothetical protein STEHIDRAFT_121331 [Stereum hirsutum FP-91666 SS1]
GME10774_g	3872	219	650.66	38.06	-4.09556	0	0	-	-	-	-	gi|403415753|emb|CCM02453.1|/5.4806e-24/predicted protein [Fibroporia radiculosa]
GME10956_g	124	7	20.84	1.22	-4.0944	3.28512e-28	5.14427e-27	ko02010//ABC transporters;ko01100//Metabolic pathways;ko00983//Drug metabolism - other enzymes;ko00240//Pyrimidine metabolism	-	-	-	gi|299738647|ref|XP_001834696.2|/3.01602e-108/uridine phosphorylase [Coprinopsis cinerea okayama7||130]
GME3592_g	123	7	20.67	1.22	-4.08259	6.12172e-28	9.53351e-27	-	-	-	-	gi|336375711|gb|EGO04047.1|/3.1854e-10/hypothetical protein SERLA73DRAFT_175780 [Serpula lacrymans var. lacrymans S7.3]
GME3986_g	52	3	8.74	0.52	-4.07105	1.87698e-12	1.35714e-11	-	-	-	-	gi|392586372|gb|EIW75709.1|/1.64075e-34/hypothetical protein CONPUDRAFT_112253 [Coniophora puteana RWD-64-598 SS2]
GME2629_g	70	4	11.76	0.7	-4.07039	2.08494e-16	2.53261e-15	-	-	-	-	gi|389742770|gb|EIM83956.1|/1.70756e-74/hypothetical protein STEHIDRAFT_123510 [Stereum hirsutum FP-91666 SS1]
GME1808_g	101	6	16.97	1.04	-4.02833	6.21746e-23	8.97573e-22	ko04130//SNARE interactions in vesicular transport;ko04145//Phagosome	-	-	GO:0006810//transport	gi|169858758|ref|XP_001836023.1|/1.61447e-86/hypothetical protein CC1G_05016 [Coprinopsis cinerea okayama7||130]
GME3902_g	337	20	56.63	3.48	-4.02441	2.08662e-73	4.83448e-72	-	-	-	-	gi|342869355|gb|EGU73132.1|/2.15246e-120/hypothetical protein FOXB_16367 [Fusarium oxysporum Fo5176]
GME11123_g	164	10	27.56	1.74	-3.98542	3.3726e-36	6.03731e-35	-	-	-	-	-
GME1679_g	49	3	8.23	0.52	-3.98431	1.21114e-11	8.05186e-11	ko00624//Polycyclic aromatic hydrocarbon degradation;ko01100//Metabolic pathways;ko00627//Aminobenzoate degradation;ko00363//Bisphenol degradation;ko01110//Biosynthesis of secondary metabolites;ko00903//Limonene and pinene degradation;ko00945//Stilbenoid, diarylheptanoid and gingerol biosynthesis;ko01120//Microbial metabolism in diverse environments;ko01100//Metabolic pathways;ko00590//Arachidoni…	-	GO:0046872//metal ion binding	-	gi|336372282|gb|EGO00621.1|/9.40099e-164/hypothetical protein SERLA73DRAFT_178475 [Serpula lacrymans var. lacrymans S7.3]
GME79_g	4595	285	772.15	49.53	-3.96251	0	0	-	-	-	-	-
GME6955_g	48	3	8.07	0.52	-3.95599	2.25012e-11	1.46163e-10	ko01100//Metabolic pathways;ko00330//Arginine and proline metabolism;ko01110//Biosynthesis of secondary metabolites	-	-	-	gi|403417012|emb|CCM03712.1|/3.04812e-145/predicted protein [Fibroporia radiculosa]
GME2994_g	80	5	13.44	0.87	-3.94937	3.40928e-18	4.35926e-17	ko01100//Metabolic pathways;ko00250//Alanine, aspartate and glutamate metabolism;ko00240//Pyrimidine metabolism	-	GO:0016743//carboxyl- or carbamoyltransferase activity;GO:0031406//carboxylic acid binding;GO:0016879//ligase activity, forming carbon-nitrogen bonds;GO:0032559	GO:0009064//glutamine family amino acid metabolic process;GO:0006220//pyrimidine nucleotide metabolic process;GO:0019856//pyrimidine nucleobase biosynthetic process	gi|299738378|ref|XP_001838320.2|/0/aspartate carbamoyltransferase [Coprinopsis cinerea okayama7||130]
GME4584_g	820	52	137.79	9.04	-3.93	2.84062e-173	8.16006e-172	-	-	-	-	gi|169854762|ref|XP_001834053.1|/2.62997e-64/hypothetical protein CC1G_11023 [Coprinopsis cinerea okayama7||130]
GME837_g	94	6	15.8	1.04	-3.92527	4.71094e-21	6.51335e-20	-	-	-	-	gi|170097816|ref|XP_001880127.1|/3.96884e-50/predicted protein [Laccaria bicolor S238N-H82]
GME3714_g	964	62	161.99	10.78	-3.90948	1.3057e-202	3.88195e-201	-	-	GO:0004673//protein histidine kinase activity;GO:0032559	GO:0006468//protein phosphorylation;GO:0007165//signal transduction	gi|336388383|gb|EGO29527.1|/0/hypothetical protein SERLADRAFT_457378 [Serpula lacrymans var. lacrymans S7.9]
GME9001_g	77	5	12.94	0.87	-3.89468	2.16812e-17	2.70713e-16	-	-	-	-	gi|169851919|ref|XP_001832648.1|/1.94774e-75/G-X-X-X-Q-X-W domain-containing protein [Coprinopsis cinerea okayama7||130]
GME1676_g	481	32	80.83	5.56	-3.86173	5.80534e-101	1.44336e-99	-	-	-	-	gi|299738900|ref|XP_001834878.2|/1.33263e-13/hypothetical protein CC1G_09805 [Coprinopsis cinerea okayama7||130]
GME9790_g	60	4	10.08	0.7	-3.848	1.01603e-13	9.49374e-13	ko04122//Sulfur relay system	GO:0044424//intracellular part	GO:0003723//RNA binding;GO:0032559	GO:0006400//tRNA modification	gi|302694583|ref|XP_003036970.1|/1.20476e-152/hypothetical protein SCHCODRAFT_48271 [Schizophyllum commune H4-8]
GME10808_g	340	23	57.13	4	-3.83618	1.75656e-71	4.0477e-70	ko04650//Natural killer cell mediated cytotoxicity;ko04360//Axon guidance;ko04510//Focal adhesion;ko04062//Chemokine signaling pathway;ko04666//Fc gamma R-mediated phagocytosis;ko04010//MAPK signaling pathway;ko05211//Renal cell carcinoma;ko04011//MAPK signaling pathway - yeast;ko04660//T cell receptor signaling pathway;ko04810//Regulation of actin cytoskeleton;ko05120//Epithelial cell signaling …	-	-	-	gi|393210512|gb|EJC97288.1|/1.0295e-57/kinase-like protein [Fomitiporia mediterranea MF3/22]
GME3084_g	44	3	7.39	0.52	-3.82899	2.6501e-10	1.58243e-09	-	-	-	-	gi|302693122|ref|XP_003036240.1|/3.57305e-67/hypothetical protein SCHCODRAFT_232891 [Schizophyllum commune H4-8]
GME3187_g	59	4	9.91	0.7	-3.82346	1.87755e-13	1.60129e-12	-	-	-	-	gi|390596443|gb|EIN05845.1|/1.06943e-07/hypothetical protein PUNSTDRAFT_145751 [Punctularia strigosozonata HHB-11173 SS5]
GME2201_g	102	7	17.14	1.22	-3.81241	2.60982e-22	3.71714e-21	-	-	-	-	gi|299738900|ref|XP_001834878.2|/3.19763e-12/hypothetical protein CC1G_09805 [Coprinopsis cinerea okayama7||130]
GME9376_g	43	3	7.23	0.52	-3.79741	4.89412e-10	2.82901e-09	ko01100//Metabolic pathways;ko00500//Starch and sucrose metabolism;ko00040//Pentose and glucuronate interconversions	-	GO:0004553//hydrolase activity, hydrolyzing O-glycosyl compounds	GO:0045229//external encapsulating structure organization;GO:0044238//primary metabolic process	gi|393218712|gb|EJD04200.1|/1.97428e-86/pectin lyase-like protein [Fomitiporia mediterranea MF3/22]
GME6964_g	43	3	7.23	0.52	-3.79741	4.89412e-10	2.82709e-09	ko04141//Protein processing in endoplasmic reticulum;ko01100//Metabolic pathways;ko00513//Various types of N-glycan biosynthesis;ko00510//N-Glycan biosynthesis	-	GO:0016787//hydrolase activity	-	gi|170114997|ref|XP_001888694.1|/7.92148e-167/glycoside hydrolase family 47 protein [Laccaria bicolor S238N-H82]
GME10016_g	140	10	23.53	1.74	-3.75734	8.40258e-30	1.35317e-28	ko03460//Fanconi anemia pathway;ko04146//Peroxisome	-	-	GO:0006810//transport	gi|169848347|ref|XP_001830881.1|/0/hypothetical protein CC1G_02332 [Coprinopsis cinerea okayama7||130]
GME11443_g	524	38	88.05	6.6	-3.73779	4.23744e-107	1.08201e-105	ko01100//Metabolic pathways;ko00785//Lipoic acid metabolism	GO:0043231//intracellular membrane-bounded organelle	GO:0043169//cation binding;GO:0051536//iron-sulfur cluster binding;GO:0016783//sulfurtransferase activity	GO:0006633//fatty acid biosynthetic process	gi|306755828|sp|B0CQH8.1|LIPA_LACBS/1.51803e-169/RecName: Full=Lipoyl synthase, mitochondrial; AltName: Full=Lipoate synthase; Short=LS; Short=Lip-syn; AltName: Full=Lipoic acid synthase; Flags: Precursor
GME5901_g	41	3	6.89	0.52	-3.72792	1.66234e-09	9.17847e-09	-	-	-	-	gi|170108848|ref|XP_001885632.1|/1.07785e-84/predicted protein [Laccaria bicolor S238N-H82]
GME4673_g	609	45	102.34	7.82	-3.71006	1.7096e-123	4.52858e-122	-	-	-	-	gi|336389018|gb|EGO30161.1|/1.33223e-46/hypothetical protein SERLADRAFT_454467 [Serpula lacrymans var. lacrymans S7.9]
GME3300_g	40	3	6.72	0.52	-3.69188	3.057e-09	1.65249e-08	-	-	-	-	gi|393213518|gb|EJC99014.1|/1.07158e-42/kinase-like protein [Fomitiporia mediterranea MF3/22]
GME4047_g	534	40	89.73	6.95	-3.69051	5.00694e-108	1.28235e-106	-	-	-	-	-
GME3458_g	53	4	8.91	0.7	-3.67	7.31472e-12	4.94412e-11	-	-	-	-	gi|170102274|ref|XP_001882353.1|/1.81132e-06/predicted protein [Laccaria bicolor S238N-H82]
GME1185_g	157	12	26.38	2.09	-3.65787	1.35064e-32	2.25186e-31	-	-	-	-	gi|342319805|gb|EGU11751.1|/1.16339e-63/2OG-Fe(II) oxygenase [Rhodotorula glutinis ATCC 204091]
GME6620_g	104	8	17.48	1.39	-3.65255	5.38104e-22	7.61314e-21	-	-	-	-	gi|390604000|gb|EIN13391.1|/5.70536e-09/hypothetical protein PUNSTDRAFT_139948 [Punctularia strigosozonata HHB-11173 SS5]
GME5154_g	181	14	30.42	2.43	-3.64599	3.1318e-37	5.67797e-36	ko00624//Polycyclic aromatic hydrocarbon degradation;ko01100//Metabolic pathways;ko00627//Aminobenzoate degradation;ko00363//Bisphenol degradation;ko01110//Biosynthesis of secondary metabolites;ko00903//Limonene and pinene degradation;ko00945//Stilbenoid, diarylheptanoid and gingerol biosynthesis;ko01120//Microbial metabolism in diverse environments;ko00100//Steroid biosynthesis;ko01100//Metaboli…	-	-	-	gi|336365283|gb|EGN93634.1|/8.63733e-115/hypothetical protein SERLA73DRAFT_189361 [Serpula lacrymans var. lacrymans S7.3]
GME5373_g	12570	985	2112.29	171.19	-3.62514	0	0	ko00051//Fructose and mannose metabolism	-	GO:0004721//phosphoprotein phosphatase activity	GO:0006796//phosphate-containing compound metabolic process	gi|170087134|ref|XP_001874790.1|/0/predicted protein [Laccaria bicolor S238N-H82]
GME2494_g	1436	113	241.31	19.64	-3.61902	4.65914e-283	1.48935e-281	ko01100//Metabolic pathways;ko00624//Polycyclic aromatic hydrocarbon degradation;ko00626//Naphthalene degradation;ko00621//Dioxin degradation;ko01120//Microbial metabolism in diverse environments	-	-	-	gi|299739261|ref|XP_001835173.2|/2.06942e-93/salicylate hydroxylase [Coprinopsis cinerea okayama7||130]
GME10404_g	76	6	12.77	1.04	-3.6181	2.7662e-16	3.10303e-15	ko00624//Polycyclic aromatic hydrocarbon degradation;ko01100//Metabolic pathways;ko00627//Aminobenzoate degradation;ko00363//Bisphenol degradation;ko01110//Biosynthesis of secondary metabolites;ko00903//Limonene and pinene degradation;ko00945//Stilbenoid, diarylheptanoid and gingerol biosynthesis;ko01120//Microbial metabolism in diverse environments;ko01100//Metabolic pathways;ko00627//Aminobenzo…	-	-	-	gi|336370804|gb|EGN99144.1|/8.27569e-92/hypothetical protein SERLA73DRAFT_181973 [Serpula lacrymans var. lacrymans S7.3]
GME11060_g	1873	148	314.74	25.72	-3.6132	0	0	ko00624//Polycyclic aromatic hydrocarbon degradation;ko01100//Metabolic pathways;ko00627//Aminobenzoate degradation;ko00363//Bisphenol degradation;ko01110//Biosynthesis of secondary metabolites;ko00903//Limonene and pinene degradation;ko00945//Stilbenoid, diarylheptanoid and gingerol biosynthesis;ko01120//Microbial metabolism in diverse environments;ko01100//Metabolic pathways;ko00590//Arachidoni…	-	-	-	gi|170099888|ref|XP_001881162.1|/0/predicted protein [Laccaria bicolor S238N-H82]
GME9599_g	101	8	16.97	1.39	-3.60983	3.28618e-21	4.55088e-20	-	-	-	-	gi|170084367|ref|XP_001873407.1|/4.62123e-123/predicted protein [Laccaria bicolor S238N-H82]
GME6700_g	4486	356	753.84	61.87	-3.60695	0	0	-	-	-	-	gi|299748192|ref|XP_001837531.2|/2.08378e-115/hypothetical protein CC1G_01443 [Coprinopsis cinerea okayama7||130]
GME8200_g	176	14	29.58	2.43	-3.60559	6.35436e-36	1.13273e-34	ko03450//Non-homologous end-joining;ko03440//Homologous recombination	-	-	-	gi|299750159|ref|XP_001836574.2|/1.61259e-122/hypothetical protein CC1G_10068 [Coprinopsis cinerea okayama7||130]
GME11116_g	63	5	10.59	0.87	-3.60554	1.10451e-13	1.01531e-12	-	-	GO:0005488//binding	-	gi|393223913|gb|EJD32549.1|/2.13374e-48/hypothetical protein AURDEDRAFT_77607 [Auricularia delicata TFB-10046 SS5]
GME5018_g	88	7	14.79	1.22	-3.59967	1.28232e-18	1.6749e-17	ko01100//Metabolic pathways;ko00627//Aminobenzoate degradation;ko04111//Cell cycle - yeast;ko00740//Riboflavin metabolism;ko05152//Tuberculosis;ko00564//Glycerophospholipid metabolism;ko00562//Inositol phosphate metabolism;ko00565//Ether lipid metabolism;ko01120//Microbial metabolism in diverse environments	-	-	-	gi|336382556|gb|EGO23706.1|/1.67983e-130/hypothetical protein SERLADRAFT_469931 [Serpula lacrymans var. lacrymans S7.9]
GME11094_g	50	4	8.4	0.7	-3.58496	4.49436e-11	2.85404e-10	ko02010//ABC transporters;ko02010//ABC transporters	-	GO:0017111//nucleoside-triphosphatase activity;GO:0000166//nucleotide binding	-	gi|403414083|emb|CCM00783.1|/0/predicted protein [Fibroporia radiculosa]
GME8016_g	124	10	20.84	1.74	-3.5822	1.33865e-25	2.04722e-24	ko00620//Pyruvate metabolism	-	GO:0050662//coenzyme binding;GO:0003824//catalytic activity	-	gi|336367817|gb|EGN96161.1|/0/hypothetical protein SERLA73DRAFT_94207 [Serpula lacrymans var. lacrymans S7.3]
GME8112_g	124	10	20.84	1.74	-3.5822	1.33865e-25	2.04354e-24	ko00040//Pentose and glucuronate interconversions	-	GO:0016829//lyase activity	-	gi|169859107|ref|XP_001836194.1|/2.05753e-84/pectate lyase C [Coprinopsis cinerea okayama7||130]
GME2559_g	173	14	29.07	2.43	-3.5805	3.84888e-35	6.74784e-34	ko04140//Regulation of autophagy;ko04622//RIG-I-like receptor signaling pathway	GO:0044424//intracellular part	-	GO:0007033//vacuole organization	gi|403416756|emb|CCM03456.1|/1.36949e-33/predicted protein [Fibroporia radiculosa]
GME3581_g	123	10	20.67	1.74	-3.57038	2.43964e-25	3.71096e-24	-	-	-	-	gi|159025253|emb|CAI94747.1|/0/phosphate transporter [Hebeloma cylindrosporum]
GME5847_g	73	6	12.27	1.04	-3.56048	1.68138e-15	1.84713e-14	-	-	-	-	gi|299743500|ref|XP_001835814.2|/1.51085e-72/hypothetical protein CC1G_02902 [Coprinopsis cinerea okayama7||130]
GME11825_g	683	56	114.77	9.73	-3.56016	1.05028e-133	2.84411e-132	ko01100//Metabolic pathways;ko00564//Glycerophospholipid metabolism	-	-	-	gi|169863595|ref|XP_001838416.1|/7.88148e-42/phosphatidylserine decarboxylase proenzyme 2 [Coprinopsis cinerea okayama7||130]
GME7600_g	1535	127	257.94	22.07	-3.54688	2.2745e-297	7.32579e-296	ko00930//Caprolactam degradation;ko01120//Microbial metabolism in diverse environments	-	GO:0016491//oxidoreductase activity	-	gi|170093614|ref|XP_001878028.1|/3.55247e-149/predicted protein [Laccaria bicolor S238N-H82]
GME11540_g	1627	135	273.4	23.46	-3.54274	0	0	-	-	-	-	gi|170086143|ref|XP_001874295.1|/2.60352e-49/predicted protein [Laccaria bicolor S238N-H82]
GME5441_g	60	5	10.08	0.87	-3.53434	6.7102e-13	5.06272e-12	-	-	-	-	gi|12862434|dbj|BAB32470.1|/9.54332e-106/Pol-like protein Pol-2 [Tricholoma matsutake]
GME8526_g	60	5	10.08	0.87	-3.53434	6.7102e-13	5.05823e-12	ko05010//Alzheimer's disease;ko04141//Protein processing in endoplasmic reticulum;ko04120//Ubiquitin mediated proteolysis	-	-	-	gi|390601239|gb|EIN10633.1|/1.20516e-109/LON-domain-containing protein [Punctularia strigosozonata HHB-11173 SS5]
GME10385_g	117	10	19.66	1.74	-3.4981	8.82688e-24	1.29853e-22	-	-	-	-	-
GME458_g	163	14	27.39	2.43	-3.49462	1.51607e-32	2.5178e-31	ko00260//Glycine, serine and threonine metabolism	-	-	-	gi|392569231|gb|EIW62405.1|/0/GMC oxidoreductase [Trametes versicolor FP-101664 SS1]
GME8920_g	149	13	25.04	2.26	-3.46984	1.0371e-29	1.66385e-28	-	-	GO:0005488//binding	-	gi|336373867|gb|EGO02205.1|/2.97766e-50/hypothetical protein SERLA73DRAFT_41398 [Serpula lacrymans var. lacrymans S7.3]
GME2525_g	687	60	115.44	10.43	-3.46833	1.49701e-131	4.02819e-130	-	-	-	-	gi|170107715|ref|XP_001885067.1|/2.79177e-09/predicted protein [Laccaria bicolor S238N-H82]
GME11905_g	46	4	7.73	0.7	-3.46504	4.96266e-10	2.86473e-09	ko01100//Metabolic pathways;ko00310//Lysine degradation;ko00780//Biotin metabolism	-	-	-	gi|358380374|gb|EHK18052.1|/8.10631e-33/hypothetical protein TRIVIDRAFT_159771 [Trichoderma virens Gv29-8]
GME1044_g	57	5	9.58	0.87	-3.46094	4.03368e-12	2.80904e-11	-	-	-	-	-
GME5106_g	124	11	20.84	1.91	-3.44771	8.20852e-25	1.23754e-23	-	-	-	-	-
GME302_g	124	11	20.84	1.91	-3.44771	8.20852e-25	1.23535e-23	-	-	GO:0000166//nucleotide binding	-	gi|336368527|gb|EGN96870.1|/6.19697e-157/hypothetical protein SERLA73DRAFT_111622 [Serpula lacrymans var. lacrymans S7.3]
GME11728_g	79	7	13.28	1.22	-3.4443	2.79604e-16	3.13238e-15	-	-	-	-	-
GME10692_g	45	4	7.56	0.7	-3.43296	9.01256e-10	5.08519e-09	-	-	-	-	gi|78057570|gb|ABB17278.1|/8.3153e-126/lectin PVL [Lacrymaria velutina]
GME2614_g	778	70	130.74	12.17	-3.4253	3.76116e-147	1.04173e-145	ko00260//Glycine, serine and threonine metabolism	-	GO:0016491//oxidoreductase activity;GO:0050662//coenzyme binding	GO:0044281//small molecule metabolic process	gi|336369222|gb|EGN97564.1|/0/hypothetical protein SERLA73DRAFT_184316 [Serpula lacrymans var. lacrymans S7.3]
GME6521_g	1331	120	223.66	20.86	-3.4225	2.71944e-250	8.50125e-249	-	-	-	-	gi|390599670|gb|EIN09066.1|/4.00566e-119/soluble quino protein glucose dehydrogenase, partial [Punctularia strigosozonata HHB-11173 SS5]
GME6935_g	111	10	18.65	1.74	-3.42202	3.12048e-22	4.43703e-21	-	-	-	-	gi|389740870|gb|EIM82060.1|/1.33208e-09/hypothetical protein STEHIDRAFT_161412 [Stereum hirsutum FP-91666 SS1]
GME8021_g	77	7	12.94	1.22	-3.40688	9.15896e-16	1.01141e-14	-	-	GO:0003676//nucleic acid binding;GO:0016817//hydrolase activity, acting on acid anhydrides	-	gi|170094100|ref|XP_001878271.1|/0/SNF2 superfamily chromatin remodeling protein [Laccaria bicolor S238N-H82]
GME7009_g	44	4	7.39	0.7	-3.40015	1.6341e-09	9.0343e-09	-	-	-	-	gi|389746533|gb|EIM87713.1|/2.40661e-21/hypothetical protein STEHIDRAFT_121331 [Stereum hirsutum FP-91666 SS1]
GME9070_g	337	31	56.63	5.39	-3.39321	3.85282e-64	8.46525e-63	-	-	-	-	gi|392563263|gb|EIW56442.1|/0/MFS general substrate transporter [Trametes versicolor FP-101664 SS1]
GME11004_g	119	11	20	1.91	-3.38836	1.58084e-23	2.31357e-22	-	-	-	-	gi|170089849|ref|XP_001876147.1|/4.71285e-15/predicted protein [Laccaria bicolor S238N-H82]
GME6745_g	86	8	14.45	1.39	-3.37791	2.52352e-17	3.14165e-16	ko04914//Progesterone-mediated oocyte maturation;ko04120//Ubiquitin mediated proteolysis;ko04110//Cell cycle;ko04111//Cell cycle - yeast	-	-	-	gi|392560954|gb|EIW54136.1|/0/WD40 repeat-like protein [Trametes versicolor FP-101664 SS1]
GME6922_g	289	27	48.56	4.69	-3.37211	6.58296e-55	1.38896e-53	-	-	-	-	gi|336365778|gb|EGN94127.1|/6.49945e-29/hypothetical protein SERLA73DRAFT_188716 [Serpula lacrymans var. lacrymans S7.3]
GME10039_g	52	5	8.74	0.87	-3.32855	7.80702e-11	4.87752e-10	-	-	-	-	gi|170093253|ref|XP_001877848.1|/1.5987e-129/predicted protein [Laccaria bicolor S238N-H82]
GME2480_g	155	15	26.05	2.61	-3.31916	9.86436e-30	1.58557e-28	-	-	-	-	-
GME5645_g	278	27	46.72	4.69	-3.31638	4.16234e-52	8.71733e-51	ko00480//Glutathione metabolism	-	GO:0003824//catalytic activity	-	gi|336368993|gb|EGN97335.1|/0/hypothetical protein SERLA73DRAFT_110519 [Serpula lacrymans var. lacrymans S7.3]
GME6374_g	221	22	37.14	3.82	-3.28133	2.46356e-41	4.67581e-40	-	-	-	-	gi|392559034|gb|EIW52219.1|/6.66914e-25/hypothetical protein TRAVEDRAFT_175319 [Trametes versicolor FP-101664 SS1]
GME12040_g	80	8	13.44	1.39	-3.27338	8.55248e-16	9.4937e-15	ko01100//Metabolic pathways;ko00380//Tryptophan metabolism	-	GO:0016740//transferase activity	-	gi|242220185|ref|XP_002475862.1|/3.80196e-135/predicted protein [Postia placenta Mad-698-R]
GME1488_g	50	5	8.4	0.87	-3.2713	2.52758e-10	1.51352e-09	ko00624//Polycyclic aromatic hydrocarbon degradation;ko01100//Metabolic pathways;ko00627//Aminobenzoate degradation;ko00363//Bisphenol degradation;ko01110//Biosynthesis of secondary metabolites;ko00903//Limonene and pinene degradation;ko00945//Stilbenoid, diarylheptanoid and gingerol biosynthesis;ko01120//Microbial metabolism in diverse environments	-	GO:0046872//metal ion binding	-	gi|170111507|ref|XP_001886957.1|/2.0109e-122/predicted protein [Laccaria bicolor S238N-H82]
GME2504_g	40	4	6.72	0.7	-3.26303	1.73524e-08	8.78257e-08	-	-	-	-	gi|238602025|ref|XP_002395569.1|/1.36079e-54/hypothetical protein MPER_04357 [Moniliophthora perniciosa FA553]
GME3203_g	40	4	6.72	0.7	-3.26303	1.73524e-08	8.77734e-08	ko03022//Basal transcription factors;ko05168//Herpes simplex infection	-	-	-	gi|390595374|gb|EIN04780.1|/0/beach-domain-containing protein [Punctularia strigosozonata HHB-11173 SS5]
GME1655_g	40	4	6.72	0.7	-3.26303	1.73524e-08	8.77212e-08	-	-	-	-	gi|238582519|ref|XP_002389957.1|/5.64705e-41/hypothetical protein MPER_10847 [Moniliophthora perniciosa FA553]
GME9438_g	40	4	6.72	0.7	-3.26303	1.73524e-08	8.76691e-08	ko04011//MAPK signaling pathway - yeast;ko04113//Meiosis - yeast	-	GO:0019001//guanyl nucleotide binding;GO:0060089	GO:0007166//cell surface receptor signaling pathway	gi|336377023|gb|EGO05358.1|/1.49227e-159/hypothetical protein SERLA73DRAFT_174479 [Serpula lacrymans var. lacrymans S7.3]
GME10852_g	1050	106	176.44	18.42	-3.25983	2.47874e-189	7.24286e-188	-	-	-	-	-
GME2553_g	265	27	44.53	4.69	-3.24712	8.0955e-49	1.6587e-47	-	-	-	-	gi|403416751|emb|CCM03451.1|/7.41636e-83/predicted protein [Fibroporia radiculosa]
GME10221_g	48	5	8.07	0.87	-3.21348	8.1298e-10	4.60238e-09	ko01100//Metabolic pathways;ko00520//Amino sugar and nucleotide sugar metabolism;ko00500//Starch and sucrose metabolism;ko01110//Biosynthesis of secondary metabolites;ko01100//Metabolic pathways;ko00500//Starch and sucrose metabolism	-	GO:0004553//hydrolase activity, hydrolyzing O-glycosyl compounds	GO:0000272//polysaccharide catabolic process	gi|49333363|gb|AAT64006.1|/0/cellobiohydrolase I-I [Volvariella volvacea]
GME7193_g	561	59	94.27	10.25	-3.20117	2.91836e-100	7.23464e-99	-	-	-	-	-
GME4169_g	322	34	54.11	5.91	-3.19467	3.8893e-58	8.33016e-57	-	-	-	-	gi|392563975|gb|EIW57153.1|/6.37634e-17/hypothetical protein TRAVEDRAFT_48204 [Trametes versicolor FP-101664 SS1]
GME1064_g	1363	144	229.04	25.03	-3.19387	1.27987e-240	3.98635e-239	-	-	-	-	gi|170087978|ref|XP_001875212.1|/5.41122e-134/predicted protein [Laccaria bicolor S238N-H82]
GME5767_g	123	13	20.67	2.26	-3.19314	4.36474e-23	6.33334e-22	-	-	GO:0004180//carboxypeptidase activity	GO:0019538//protein metabolic process	gi|390594896|gb|EIN04304.1|/0/alpha/beta-hydrolase [Punctularia strigosozonata HHB-11173 SS5]
GME907_g	47	5	7.9	0.87	-3.18277	1.45422e-09	8.07131e-09	-	-	-	-	gi|170093147|ref|XP_001877795.1|/6.08632e-74/glycoside hydrolase family 23 protein [Laccaria bicolor S238N-H82]
GME10962_g	47	5	7.9	0.87	-3.18277	1.45422e-09	8.06605e-09	-	-	-	-	gi|170117559|ref|XP_001889966.1|/2.2094e-161/predicted protein [Laccaria bicolor S238N-H82]
GME7054_g	1611	173	270.72	30.07	-3.1704	4.45806e-282	1.41973e-280	ko01100//Metabolic pathways;ko00624//Polycyclic aromatic hydrocarbon degradation;ko00340//Histidine metabolism;ko00540//Lipopolysaccharide biosynthesis;ko01120//Microbial metabolism in diverse environments;ko00350//Tyrosine metabolism;ko04728//Dopaminergic synapse;ko00140//Steroid hormone biosynthesis;ko01100//Metabolic pathways;ko00965//Betalain biosynthesis;ko00350//Tyrosine metabolism	-	GO:0016740//transferase activity	GO:0044237//cellular metabolic process	gi|170095235|ref|XP_001878838.1|/5.714e-69/predicted protein [Laccaria bicolor S238N-H82]
GME2507_g	1264	136	212.4	23.64	-3.16748	1.54212e-221	4.71679e-220	ko01100//Metabolic pathways;ko00624//Polycyclic aromatic hydrocarbon degradation;ko00626//Naphthalene degradation;ko00621//Dioxin degradation;ko01120//Microbial metabolism in diverse environments	-	-	-	gi|145241462|ref|XP_001393377.1|/4.70106e-79/hypothetical protein ANI_1_970084 [Aspergillus niger CBS 513.88]
GME5289_g	65	7	10.92	1.22	-3.16202	1.03153e-12	7.63365e-12	ko03008//Ribosome biogenesis in eukaryotes	-	-	-	gi|170109565|ref|XP_001885989.1|/1.01758e-44/predicted protein [Laccaria bicolor S238N-H82]
GME3083_g	267	29	44.87	5.04	-3.15426	6.68712e-48	1.35705e-46	ko00562//Inositol phosphate metabolism	-	GO:0042578//phosphoric ester hydrolase activity	GO:0044238//primary metabolic process	gi|389741737|gb|EIM82925.1|/9.15514e-112/PLC-like phosphodiesterase [Stereum hirsutum FP-91666 SS1]
GME3365_g	46	5	7.73	0.87	-3.15138	2.59648e-09	1.41073e-08	-	-	-	-	gi|170115214|ref|XP_001888802.1|/5.04584e-15/predicted protein [Laccaria bicolor S238N-H82]
GME6592_g	46	5	7.73	0.87	-3.15138	2.59648e-09	1.40983e-08	ko01100//Metabolic pathways;ko00520//Amino sugar and nucleotide sugar metabolism;ko00500//Starch and sucrose metabolism;ko01110//Biosynthesis of secondary metabolites	-	-	-	gi|169856056|ref|XP_001834690.1|/2.21588e-72/endoglucanase-4 [Coprinopsis cinerea okayama7||130]
GME4107_g	54	6	9.07	1.04	-3.12452	1.22199e-10	7.50766e-10	-	-	-	-	gi|375333787|gb|AFA53122.1|/9.50096e-114/lectin 2 [Agrocybe aegerita]
GME4967_g	72	8	12.1	1.39	-3.12185	8.82786e-14	8.41517e-13	ko00630//Glyoxylate and dicarboxylate metabolism;ko00910//Nitrogen metabolism	-	-	-	gi|402223970|gb|EJU04033.1|/0/Acetamidase/Formamidase [Dacryopinax sp. DJM-731 SS1]
GME7190_g	249	28	41.84	4.87	-3.10289	4.09154e-44	8.01621e-43	-	-	-	-	-
GME2163_g	53	6	8.91	1.04	-3.09884	2.1718e-10	1.306e-09	ko03022//Basal transcription factors;ko05169//Epstein-Barr virus infection	-	-	-	gi|238590662|ref|XP_002392388.1|/5.25641e-30/hypothetical protein MPER_08043 [Moniliophthora perniciosa FA553]
GME2430_g	2020	228	339.44	39.63	-3.09849	0	0	-	-	-	-	gi|336371879|gb|EGO00219.1|/1.84558e-50/hypothetical protein SERLA73DRAFT_52158 [Serpula lacrymans var. lacrymans S7.3]
GME110_g	1041	118	174.93	20.51	-3.09238	1.27065e-178	3.67495e-177	ko00624//Polycyclic aromatic hydrocarbon degradation;ko01100//Metabolic pathways;ko00627//Aminobenzoate degradation;ko00363//Bisphenol degradation;ko01110//Biosynthesis of secondary metabolites;ko00903//Limonene and pinene degradation;ko00945//Stilbenoid, diarylheptanoid and gingerol biosynthesis;ko01120//Microbial metabolism in diverse environments	-	GO:0046872//metal ion binding	-	gi|336373278|gb|EGO01616.1|/1.53559e-122/hypothetical protein SERLA73DRAFT_166166 [Serpula lacrymans var. lacrymans S7.3]
GME10328_g	44	5	7.39	0.87	-3.08649	8.2297e-09	4.29835e-08	-	-	-	-	gi|170109992|ref|XP_001886202.1|/2.22415e-17/predicted protein [Laccaria bicolor S238N-H82]
GME6073_g	114	13	19.16	2.26	-3.0837	7.68698e-21	1.06108e-19	-	-	-	-	gi|169868123|ref|XP_001840636.1|/9.6742e-09/hypothetical protein CC1G_11284 [Coprinopsis cinerea okayama7||130]
GME6116_g	105	12	17.64	2.09	-3.07728	2.77628e-19	3.68279e-18	-	-	-	-	-
GME6041_g	78	9	13.11	1.56	-3.07105	1.33829e-14	1.40141e-13	-	-	-	-	gi|170103088|ref|XP_001882759.1|/5.37233e-09/predicted protein [Laccaria bicolor S238N-H82]
GME11067_g	642	76	107.88	13.21	-3.02973	1.17315e-108	3.01368e-107	ko05322//Systemic lupus erythematosus;ko05034//Alcoholism	GO:0000785//chromatin;GO:0043231//intracellular membrane-bounded organelle	GO:0003676//nucleic acid binding	GO:0034728//nucleosome organization	gi|170100240|ref|XP_001881338.1|/1.3216e-44/histone H2B [Laccaria bicolor S238N-H82]
GME2816_g	577	69	96.96	11.99	-3.01556	2.28666e-97	5.6195e-96	-	-	-	-	gi|299756300|ref|XP_002912188.1|/3.12052e-36/hypothetical protein CC1G_13720 [Coprinopsis cinerea okayama7||130]
GME9060_g	91	11	15.29	1.91	-3.00094	1.72408e-16	2.09727e-15	-	-	-	-	gi|170116966|ref|XP_001889672.1|/0/argonaute-like protein [Laccaria bicolor S238N-H82]
GME6410_g	2522	310	423.8	53.88	-2.97556	0	0	ko02020//Two-component system;ko01100//Metabolic pathways;ko00591//Linoleic acid metabolism;ko00051//Fructose and mannose metabolism;ko00362//Benzoate degradation;ko00363//Bisphenol degradation;ko01110//Biosynthesis of secondary metabolites;ko00903//Limonene and pinene degradation;ko00650//Butanoate metabolism;ko00626//Naphthalene degradation;ko00625//Chloroalkane and chloroalkene degradation;ko0…	-	GO:0003824//catalytic activity	GO:0030001//metal ion transport;GO:0008152//metabolic process	gi|299751468|ref|XP_001830287.2|/2.34141e-130/aryl-alcohol dehydrogenase [Coprinopsis cinerea okayama7||130]
GME6122_g	203	25	34.11	4.34	-2.97443	8.5685e-35	1.49299e-33	-	-	GO:0046872//metal ion binding	GO:0006351//transcription, DNA-dependent	gi|170113994|ref|XP_001888195.1|/0/predicted protein [Laccaria bicolor S238N-H82]
GME9917_g	170	21	28.57	3.65	-2.96853	2.48028e-29	3.95681e-28	-	-	-	-	gi|336371385|gb|EGN99724.1|/8.99861e-25/hypothetical protein SERLA73DRAFT_179880 [Serpula lacrymans var. lacrymans S7.3]
GME10562_g	1897	235	318.78	40.84	-2.96451	0	0	-	-	-	-	gi|299749859|ref|XP_001836385.2|/2.1758e-109/arylesterase [Coprinopsis cinerea okayama7||130]
GME125_g	779	97	130.9	16.86	-2.95679	2.45468e-128	6.56357e-127	ko01100//Metabolic pathways;ko05132//Salmonella infection;ko00860//Porphyrin and chlorophyll metabolism;ko01110//Biosynthesis of secondary metabolites	-	GO:0016634	GO:0006778//porphyrin-containing compound metabolic process	gi|169850053|ref|XP_001831724.1|/3.07796e-153/coproporphyrinogen III oxidase [Coprinopsis cinerea okayama7||130]
GME4472_g	40	5	6.72	0.87	-2.94937	8.05986e-08	3.81799e-07	-	-	-	-	gi|336375885|gb|EGO04220.1|/6.39559e-07/hypothetical protein SERLA73DRAFT_128372 [Serpula lacrymans var. lacrymans S7.3]
GME4140_g	40	5	6.72	0.87	-2.94937	8.05986e-08	3.81587e-07	-	-	-	-	gi|242217689|ref|XP_002474642.1|/1.69019e-10/predicted protein [Postia placenta Mad-698-R]
GME4246_g	191	24	32.1	4.17	-2.94445	1.62545e-32	2.68895e-31	ko04120//Ubiquitin mediated proteolysis	-	-	-	gi|390600260|gb|EIN09655.1|/0/DUF185-domain-containing protein, partial [Punctularia strigosozonata HHB-11173 SS5]
GME11545_g	262	33	44.03	5.74	-2.93936	5.35444e-44	1.04664e-42	-	-	-	-	gi|403415508|emb|CCM02208.1|/0/predicted protein [Fibroporia radiculosa]
GME6570_g	150	19	25.21	3.3	-2.93346	9.55062e-26	1.46587e-24	-	-	-	-	gi|170113984|ref|XP_001888190.1|/6.89765e-66/predicted protein [Laccaria bicolor S238N-H82]
GME3193_g	55	7	9.24	1.22	-2.92101	3.09818e-10	1.83453e-09	-	-	-	-	gi|336366216|gb|EGN94564.1|/9.25974e-48/hypothetical protein SERLA73DRAFT_163095 [Serpula lacrymans var. lacrymans S7.3]
GME5457_g	227	29	38.15	5.04	-2.92019	4.62106e-38	8.46829e-37	ko01100//Metabolic pathways;ko05143//African trypanosomiasis;ko00380//Tryptophan metabolism	-	-	-	gi|170087380|ref|XP_001874913.1|/9.91687e-107/predicted protein [Laccaria bicolor S238N-H82]
GME11561_g	124	16	20.84	2.78	-2.9062	2.44078e-21	3.39117e-20	-	-	-	-	gi|170086105|ref|XP_001874276.1|/1.34103e-11/predicted protein [Laccaria bicolor S238N-H82]
GME11172_g	93	12	15.63	2.09	-2.90274	2.44008e-16	2.74082e-15	-	-	-	-	-
GME6577_g	54	7	9.07	1.22	-2.89422	5.43006e-10	3.12605e-09	-	-	GO:0016787//hydrolase activity	-	gi|336388179|gb|EGO29323.1|/4.65443e-51/hypothetical protein SERLADRAFT_456923 [Serpula lacrymans var. lacrymans S7.9]
GME741_g	68	9	11.43	1.56	-2.87321	3.76972e-12	2.64253e-11	-	-	-	-	gi|302680949|ref|XP_003030156.1|/4.6607e-16/expressed protein [Schizophyllum commune H4-8]
GME4779_g	68	9	11.43	1.56	-2.87321	3.76972e-12	2.64036e-11	-	-	-	-	gi|299752437|ref|XP_001830925.2|/0/hypothetical protein CC1G_02376 [Coprinopsis cinerea okayama7||130]
GME1472_g	120	16	20.17	2.78	-2.85905	2.2548e-20	3.07253e-19	-	-	-	-	gi|170095081|ref|XP_001878761.1|/0/predicted protein [Laccaria bicolor S238N-H82]
GME2529_g	67	9	11.26	1.56	-2.85159	6.57306e-12	4.47484e-11	-	-	-	-	gi|170096102|ref|XP_001879271.1|/1.21348e-09/predicted protein [Laccaria bicolor S238N-H82]
GME6943_g	201	27	33.78	4.69	-2.84851	4.7875e-33	8.07701e-32	-	-	-	-	gi|336365796|gb|EGN94145.1|/1.15969e-76/hypothetical protein SERLA73DRAFT_188732 [Serpula lacrymans var. lacrymans S7.3]
GME3218_g	268	36	45.04	6.26	-2.84697	1.46588e-43	2.84575e-42	-	-	-	-	gi|299743190|ref|XP_001835599.2|/2.04945e-15/hypothetical protein CC1G_03381 [Coprinopsis cinerea okayama7||130]
GME5588_g	12769	1723	2145.73	299.45	-2.84108	0	0	-	-	GO:0003824//catalytic activity	-	gi|336367011|gb|EGN95356.1|/2.47243e-180/hypothetical protein SERLA73DRAFT_186269 [Serpula lacrymans var. lacrymans S7.3]
GME2475_g	192	26	32.26	4.52	-2.83535	1.66818e-31	2.7278e-30	-	-	-	-	gi|396479938|ref|XP_003840876.1|/3.10167e-06/hypothetical protein LEMA_P105280.1 [Leptosphaeria maculans JN3]
GME6506_g	184	25	30.92	4.34	-2.83277	3.3496e-30	5.42508e-29	-	-	-	-	gi|389746533|gb|EIM87713.1|/1.57709e-14/hypothetical protein STEHIDRAFT_121331 [Stereum hirsutum FP-91666 SS1]
GME5200_g	514	70	86.37	12.17	-2.8272	1.72134e-81	4.07703e-80	-	-	-	-	gi|336380048|gb|EGO21202.1|/1.06201e-172/hypothetical protein SERLADRAFT_452336 [Serpula lacrymans var. lacrymans S7.9]
GME4825_g	139	19	23.36	3.3	-2.8235	4.28424e-23	6.23782e-22	ko05202//Transcriptional misregulation in cancer;ko00650//Butanoate metabolism;ko01100//Metabolic pathways;ko00072//Synthesis and degradation of ketone bodies	-	-	-	gi|169847948|ref|XP_001830682.1|/6.69117e-86/hypothetical protein CC1G_03219 [Coprinopsis cinerea okayama7||130]
GME3158_g	139	19	23.36	3.3	-2.8235	4.28424e-23	6.22716e-22	-	-	-	-	-
GME1475_g	88	12	14.79	2.09	-2.82305	3.9223e-15	4.21635e-14	ko00624//Polycyclic aromatic hydrocarbon degradation;ko01100//Metabolic pathways;ko00627//Aminobenzoate degradation;ko00363//Bisphenol degradation;ko01110//Biosynthesis of secondary metabolites;ko00903//Limonene and pinene degradation;ko00945//Stilbenoid, diarylheptanoid and gingerol biosynthesis;ko01120//Microbial metabolism in diverse environments;ko01100//Metabolic pathways;ko00360//Phenylalan…	-	-	-	gi|299746194|ref|XP_001837807.2|/7.79977e-106/cytochrome P450 [Coprinopsis cinerea okayama7||130]
GME8753_g	80	11	13.44	1.91	-2.81489	8.065e-14	7.73131e-13	ko03010//Ribosome	GO:0030529//ribonucleoprotein complex	GO:0005198//structural molecule activity	GO:0010467//gene expression	gi|403418099|emb|CCM04799.1|/2.50649e-94/predicted protein [Fibroporia radiculosa]
GME4824_g	188	26	31.59	4.52	-2.80507	1.50537e-30	2.44744e-29	-	-	-	-	gi|403418561|emb|CCM05261.1|/1.12543e-96/predicted protein [Fibroporia radiculosa]
GME4728_g	383	53	64.36	9.21	-2.80489	1.25158e-60	2.72178e-59	-	GO:0031224//intrinsic to membrane	-	-	gi|170109001|ref|XP_001885708.1|/5.33152e-122/tetraspanin Tsp2 family [Laccaria bicolor S238N-H82]
GME9581_g	108	15	18.15	2.61	-2.79785	4.16882e-18	5.31446e-17	-	-	-	-	gi|170085659|ref|XP_001874053.1|/2.83696e-34/predicted protein [Laccaria bicolor S238N-H82]
GME7253_g	122	17	20.5	2.95	-2.79684	3.03752e-20	4.11274e-19	-	-	-	-	-
GME3888_g	57	8	9.58	1.39	-2.78494	4.14824e-10	2.41427e-09	-	-	-	-	gi|170109101|ref|XP_001885758.1|/1.08879e-53/predicted protein [Laccaria bicolor S238N-H82]
GME1304_g	64	9	10.75	1.56	-2.78472	3.45002e-11	2.21233e-10	-	-	-	-	gi|393244267|gb|EJD51779.1|/1.03367e-111/PLC-like phosphodiesterase [Auricularia delicata TFB-10046 SS5]
GME4128_g	50	7	8.4	1.22	-2.78351	5.0229e-09	2.66104e-08	-	-	-	-	-
GME5490_g	254	36	42.68	6.26	-2.76933	3.17108e-40	5.93914e-39	-	-	-	-	gi|302691414|ref|XP_003035386.1|/2.60654e-143/hypothetical protein SCHCODRAFT_74857 [Schizophyllum commune H4-8]
GME6328_g	84	12	14.12	2.09	-2.75617	3.53586e-14	3.57071e-13	-	-	-	-	gi|145251519|ref|XP_001397273.1|/3.64721e-18/phosphoglycerate mutase family protein [Aspergillus niger CBS 513.88]
GME2496_g	62	9	10.42	1.56	-2.73974	1.03288e-10	6.40594e-10	ko01100//Metabolic pathways;ko00240//Pyrimidine metabolism	-	GO:0003824//catalytic activity	GO:0008152//metabolic process	gi|336366225|gb|EGN94573.1|/2.16717e-82/hypothetical protein SERLA73DRAFT_188544 [Serpula lacrymans var. lacrymans S7.3]
GME8634_g	117	17	19.66	2.95	-2.73648	4.6651e-19	6.14998e-18	-	-	-	-	gi|170091928|ref|XP_001877186.1|/8.86226e-58/predicted protein [Laccaria bicolor S238N-H82]
GME11243_g	890	130	149.56	22.59	-2.72697	1.43426e-134	3.90881e-133	-	GO:0016020//membrane	-	-	gi|170097483|ref|XP_001879961.1|/0/predicted protein [Laccaria bicolor S238N-H82]
GME4332_g	307	45	51.59	7.82	-2.72185	2.0356e-47	4.11133e-46	ko01100//Metabolic pathways;ko00600//Sphingolipid metabolism	GO:0016020//membrane	-	GO:0008152//metabolic process	gi|169849718|ref|XP_001831558.1|/1.3426e-109/sphingosine hydroxylase [Coprinopsis cinerea okayama7||130]
GME7020_g	75	11	12.6	1.91	-2.72178	1.24949e-12	9.19866e-12	-	-	-	-	-
GME8677_g	136	20	22.85	3.48	-2.71503	8.66966e-22	1.21447e-20	-	GO:0030529//ribonucleoprotein complex	GO:0005198//structural molecule activity	GO:0010467//gene expression	gi|403414989|emb|CCM01689.1|/3.16207e-41/predicted protein [Fibroporia radiculosa]
GME1678_g	141	21	23.69	3.65	-2.69831	2.19626e-22	3.13336e-21	-	-	GO:0048037//cofactor binding;GO:0016740//transferase activity	GO:0008152//metabolic process	gi|242210096|ref|XP_002470892.1|/0/predicted protein [Postia placenta Mad-698-R]
GME6186_g	315	47	52.93	8.17	-2.69568	3.92858e-48	8.01072e-47	ko01100//Metabolic pathways;ko00563//Glycosylphosphatidylinositol(GPI)-anchor biosynthesis	-	-	-	gi|395325897|gb|EJF58313.1|/1.1544e-125/hypothetical protein DICSQDRAFT_182674 [Dichomitus squalens LYAD-421 SS1]
GME817_g	60	9	10.08	1.56	-2.69188	3.06918e-10	1.82116e-09	ko01100//Metabolic pathways;ko00630//Glyoxylate and dicarboxylate metabolism;ko01120//Microbial metabolism in diverse environments;ko00680//Methane metabolism	-	-	-	gi|336371500|gb|EGN99839.1|/7.68552e-98/hypothetical protein SERLA73DRAFT_180077 [Serpula lacrymans var. lacrymans S7.3]
GME3987_g	212	32	35.62	5.56	-2.67953	1.10441e-32	1.85222e-31	ko01100//Metabolic pathways;ko00540//Lipopolysaccharide biosynthesis;ko01110//Biosynthesis of secondary metabolites;ko00460//Cyanoamino acid metabolism;ko03010//Ribosome;ko00940//Phenylpropanoid biosynthesis;ko00500//Starch and sucrose metabolism;ko00511//Other glycan degradation;ko00970//Aminoacyl-tRNA biosynthesis	-	GO:0016798//hydrolase activity, acting on glycosyl bonds	GO:0044238//primary metabolic process	gi|12584217|gb|AAG59831.1|AF329731_1/0/beta-glucosidase [Volvariella volvacea]
GME7747_g	218	33	36.63	5.74	-2.6739	1.63842e-33	2.79187e-32	-	-	-	-	gi|395334063|gb|EJF66439.1|/3.40469e-13/hypothetical protein DICSQDRAFT_48167 [Dichomitus squalens LYAD-421 SS1]
GME3579_g	112	17	18.82	2.95	-2.67348	6.9819e-18	8.76914e-17	ko01100//Metabolic pathways;ko00564//Glycerophospholipid metabolism	-	-	-	gi|392566847|gb|EIW60022.1|/5.09388e-26/hypothetical protein TRAVEDRAFT_18841 [Trametes versicolor FP-101664 SS1]
GME362_g	66	10	11.09	1.74	-2.6721	4.40674e-11	2.80468e-10	-	-	-	-	gi|170100939|ref|XP_001881687.1|/3.10876e-98/predicted protein [Laccaria bicolor S238N-H82]
GME7123_g	59	9	9.91	1.56	-2.66734	5.2751e-10	3.04302e-09	-	-	GO:0003676//nucleic acid binding	GO:0006259//DNA metabolic process	gi|7248353|dbj|BAA92703.1|/7.67954e-37/reverse transcriptase [Tricholoma magnivelare]
GME2982_g	293	45	49.24	7.82	-2.65459	3.79562e-44	7.47087e-43	-	-	GO:0003824//catalytic activity	GO:0008152//metabolic process	gi|336369266|gb|EGN97608.1|/1.44253e-117/hypothetical protein SERLA73DRAFT_184383 [Serpula lacrymans var. lacrymans S7.3]
GME573_g	264	41	44.36	7.13	-2.63729	1.12511e-39	2.08882e-38	-	-	-	-	gi|389746533|gb|EIM87713.1|/8.92297e-23/hypothetical protein STEHIDRAFT_121331 [Stereum hirsutum FP-91666 SS1]
GME3662_g	508	79	85.37	13.73	-2.6364	8.3921e-75	1.95501e-73	ko00620//Pyruvate metabolism;ko01100//Metabolic pathways;ko00710//Carbon fixation in photosynthetic organisms;ko03320//PPAR signaling pathway;ko01120//Microbial metabolism in diverse environments	-	GO:0016614//oxidoreductase activity, acting on CH-OH group of donors;GO:0005488//binding	GO:0008152//metabolic process	gi|170100006|ref|XP_001881221.1|/0/predicted protein [Laccaria bicolor S238N-H82]
GME11320_g	70	11	11.76	1.91	-2.62224	1.86053e-11	1.21506e-10	-	-	-	-	gi|392597429|gb|EIW86751.1|/1.31795e-76/Isochorismatase hydrolase [Coniophora puteana RWD-64-598 SS2]
GME1568_g	70	11	11.76	1.91	-2.62224	1.86053e-11	1.21413e-10	ko03040//Spliceosome;ko05168//Herpes simplex infection;ko05130//Pathogenic Escherichia coli infection	-	GO:0005488//binding	-	gi|170108674|ref|XP_001885545.1|/0/predicted protein [Laccaria bicolor S238N-H82]
GME6206_g	229	36	38.48	6.26	-2.61987	2.25194e-34	3.89192e-33	-	-	-	-	gi|170107211|ref|XP_001884816.1|/4.18127e-80/predicted protein [Laccaria bicolor S238N-H82]
GME10236_g	114	18	19.16	3.13	-2.61386	8.70996e-18	1.09073e-16	-	-	-	-	-
GME7353_g	177	28	29.74	4.87	-2.61041	8.28232e-27	1.28278e-25	-	-	-	-	gi|392590024|gb|EIW79354.1|/6.60475e-14/hypothetical protein CONPUDRAFT_167111 [Coniophora puteana RWD-64-598 SS2]
GME3037_g	107	17	17.98	2.95	-2.60761	1.01609e-16	1.24493e-15	ko03015//mRNA surveillance pathway;ko03013//RNA transport;ko03018//RNA degradation;ko05130//Pathogenic Escherichia coli infection	-	GO:0005488//binding	-	gi|392562666|gb|EIW55846.1|/7.56288e-59/RNA-binding domain-containing protein [Trametes versicolor FP-101664 SS1]
GME10215_g	145	23	24.37	4	-2.60703	3.46422e-22	4.91757e-21	-	-	-	-	gi|299744901|ref|XP_001831342.2|/8.67327e-07/hypothetical protein CC1G_00889 [Coprinopsis cinerea okayama7||130]
GME8664_g	327	52	54.95	9.04	-2.60372	4.31138e-48	8.77025e-47	-	-	-	-	gi|390601204|gb|EIN10598.1|/0/MFS general substrate transporter [Punctularia strigosozonata HHB-11173 SS5]
GME2400_g	213	34	35.79	5.91	-2.59833	8.60546e-32	1.41259e-30	-	-	-	-	gi|238576180|ref|XP_002387945.1|/6.02458e-109/hypothetical protein MPER_13103 [Moniliophthora perniciosa FA553]
GME2367_g	94	15	15.8	2.61	-2.5978	8.15828e-15	8.68208e-14	ko01100//Metabolic pathways;ko00520//Amino sugar and nucleotide sugar metabolism;ko00500//Starch and sucrose metabolism;ko01110//Biosynthesis of secondary metabolites;ko01100//Metabolic pathways;ko00500//Starch and sucrose metabolism	-	GO:0004553//hydrolase activity, hydrolyzing O-glycosyl compounds	GO:0000272//polysaccharide catabolic process	gi|49333363|gb|AAT64006.1|/0/cellobiohydrolase I-I [Volvariella volvacea]
GME9256_g	50	8	8.4	1.39	-2.5953	1.86254e-08	9.37111e-08	-	-	-	-	-
GME606_g	275	44	46.21	7.65	-2.59467	1.51791e-40	2.86818e-39	ko01100//Metabolic pathways;ko00624//Polycyclic aromatic hydrocarbon degradation;ko00340//Histidine metabolism;ko00623//Toluene degradation;ko00627//Aminobenzoate degradation;ko00361//Chlorocyclohexane and chlorobenzene degradation;ko00363//Bisphenol degradation;ko00903//Limonene and pinene degradation;ko00626//Naphthalene degradation;ko01120//Microbial metabolism in diverse environments;ko01100/…	-	-	-	gi|403418520|emb|CCM05220.1|/1.6086e-108/predicted protein [Fibroporia radiculosa]
GME10728_g	93	15	15.63	2.61	-2.5822	1.38855e-14	1.45225e-13	-	-	-	-	gi|170113984|ref|XP_001888190.1|/8.23481e-40/predicted protein [Laccaria bicolor S238N-H82]
GME6238_g	233	38	39.15	6.6	-2.56847	3.41508e-34	5.85452e-33	-	-	-	-	gi|170095613|ref|XP_001879027.1|/3.12583e-33/predicted protein [Laccaria bicolor S238N-H82]
GME9873_g	151	25	25.37	4.34	-2.54736	1.78688e-22	2.55789e-21	-	-	-	-	gi|170094963|ref|XP_001878702.1|/5.57687e-37/predicted protein [Laccaria bicolor S238N-H82]
GME7245_g	302	50	50.75	8.69	-2.54598	1.85738e-43	3.59756e-42	ko02010//ABC transporters;ko02020//Two-component system;ko01100//Metabolic pathways;ko00630//Glyoxylate and dicarboxylate metabolism;ko04727//GABAergic synapse;ko00790//Folate biosynthesis;ko00521//Streptomycin biosynthesis;ko01110//Biosynthesis of secondary metabolites;ko00523//Polyketide sugar unit biosynthesis;ko04724//Glutamatergic synapse;ko00250//Alanine, aspartate and glutamate metabolism;…	-	-	-	gi|336374862|gb|EGO03198.1|/2.73477e-129/hypothetical protein SERLA73DRAFT_119022 [Serpula lacrymans var. lacrymans S7.3]
GME9949_g	66	11	11.09	1.91	-2.53761	1.56332e-10	9.54953e-10	ko00052//Galactose metabolism	-	-	-	gi|390602527|gb|EIN11920.1|/5.36018e-168/hypothetical protein PUNSTDRAFT_142130 [Punctularia strigosozonata HHB-11173 SS5]
GME7541_g	120	20	20.17	3.48	-2.53505	4.45992e-18	5.66856e-17	ko01100//Metabolic pathways;ko04142//Lysosome;ko00600//Sphingolipid metabolism;ko00511//Other glycan degradation	GO:0000323//lytic vacuole	GO:0004553//hydrolase activity, hydrolyzing O-glycosyl compounds;GO:0043167//ion binding	GO:0006643//membrane lipid metabolic process;GO:0007033//vacuole organization	gi|170118180|ref|XP_001890272.1|/0/glycoside hydrolase family 30 protein [Laccaria bicolor S238N-H82]
GME9896_g	119	20	20	3.48	-2.52284	7.54024e-18	9.45644e-17	ko04020//Calcium signaling pathway;ko01100//Metabolic pathways;ko04070//Phosphatidylinositol signaling system;ko00562//Inositol phosphate metabolism	-	-	-	gi|302683064|ref|XP_003031213.1|/1.10453e-144/hypothetical protein SCHCODRAFT_109536 [Schizophyllum commune H4-8]
GME4894_g	124	21	20.84	3.65	-2.51339	1.86287e-18	2.41832e-17	-	-	-	-	-
GME10982_g	584	99	98.14	17.21	-2.51159	2.83248e-81	6.67163e-80	ko01100//Metabolic pathways;ko00625//Chloroalkane and chloroalkene degradation;ko00361//Chlorocyclohexane and chlorobenzene degradation;ko01120//Microbial metabolism in diverse environments	-	GO:0003824//catalytic activity	-	gi|336365930|gb|EGN94278.1|/5.7381e-64/hypothetical protein SERLA73DRAFT_125803 [Serpula lacrymans var. lacrymans S7.3]
GME4952_g	106	18	17.81	3.13	-2.50845	5.97184e-16	6.64641e-15	ko04978//Mineral absorption	-	-	-	gi|302687967|ref|XP_003033663.1|/7.82157e-33/hypothetical protein SCHCODRAFT_106518 [Schizophyllum commune H4-8]
GME6750_g	88	15	14.79	2.61	-2.5025	1.94076e-13	1.64366e-12	ko01100//Metabolic pathways;ko00624//Polycyclic aromatic hydrocarbon degradation;ko00340//Histidine metabolism;ko00540//Lipopolysaccharide biosynthesis;ko01120//Microbial metabolism in diverse environments;ko00350//Tyrosine metabolism	-	-	-	gi|389749479|gb|EIM90650.1|/2.01828e-137/S-adenosyl-L-methionine-dependent methyltransferase [Stereum hirsutum FP-91666 SS1]
GME568_g	3816	652	641.25	113.32	-2.50048	0	0	-	-	GO:0022857//transmembrane transporter activity	GO:0006810//transport	gi|302686562|ref|XP_003032961.1|/2.87701e-155/hypothetical protein SCHCODRAFT_15564 [Schizophyllum commune H4-8]
GME2664_g	286	49	48.06	8.52	-2.49591	2.32098e-40	4.36622e-39	ko00190//Oxidative phosphorylation	-	-	-	gi|336381988|gb|EGO23139.1|/2.37073e-111/hypothetical protein SERLADRAFT_471898 [Serpula lacrymans var. lacrymans S7.9]
GME3543_g	122	21	20.5	3.65	-2.48966	5.29386e-18	6.69847e-17	-	-	-	-	gi|170112714|ref|XP_001887558.1|/2.54411e-165/MFS superfamily [Laccaria bicolor S238N-H82]
GME11684_g	2503	433	420.61	75.25	-2.48272	0	0	-	-	GO:0051540	GO:0031163	gi|392572128|gb|EIW65300.1|/3.22259e-41/hypothetical protein TRAVEDRAFT_26140 [Trametes versicolor FP-101664 SS1]
GME7319_g	115	20	19.32	3.48	-2.47294	6.0889e-17	7.51436e-16	-	-	-	-	gi|170112350|ref|XP_001887377.1|/6.71322e-62/predicted protein [Laccaria bicolor S238N-H82]
GME7957_g	86	15	14.45	2.61	-2.46895	5.51462e-13	4.2244e-12	-	-	-	-	gi|336367823|gb|EGN96167.1|/4.5855e-59/hypothetical protein SERLA73DRAFT_76157 [Serpula lacrymans var. lacrymans S7.3]
GME7960_g	3464	609	582.1	105.84	-2.45938	0	0	-	-	-	-	gi|170094162|ref|XP_001878302.1|/2.40001e-54/predicted protein [Laccaria bicolor S238N-H82]
GME5988_g	51	9	8.57	1.56	-2.45775	3.71094e-08	1.81659e-07	-	-	-	-	-
GME421_g	233	41	39.15	7.13	-2.45704	1.32557e-32	2.21441e-31	-	-	-	-	-
GME3028_g	79	14	13.28	2.43	-2.45023	6.39968e-12	4.36029e-11	-	-	-	-	-
GME10966_g	7430	1318	1248.55	229.06	-2.44646	0	0	ko05215//Prostate cancer;ko05200//Pathways in cancer;ko00480//Glutathione metabolism;ko00980//Metabolism of xenobiotics by cytochrome P450;ko00982//Drug metabolism - cytochrome P450;ko00052//Galactose metabolism	-	-	-	gi|336378939|gb|EGO20096.1|/0/putative copper radical oxidase [Serpula lacrymans var. lacrymans S7.9]
GME10132_g	596	106	100.15	18.42	-2.44282	2.54356e-80	5.97456e-79	-	-	-	-	gi|336364165|gb|EGN92527.1|/1.74458e-93/hypothetical protein SERLA73DRAFT_127369 [Serpula lacrymans var. lacrymans S7.3]
GME3904_g	129	23	21.68	4	-2.43829	1.51913e-18	1.98116e-17	-	-	-	-	gi|116202859|ref|XP_001227241.1|/4.48752e-111/hypothetical protein CHGG_09314 [Chaetomium globosum CBS 148.51]
GME5537_g	106	19	17.81	3.3	-2.43215	1.96913e-15	2.15767e-14	-	-	-	-	gi|336364074|gb|EGN92438.1|/1.86219e-60/hypothetical protein SERLA73DRAFT_147152 [Serpula lacrymans var. lacrymans S7.3]
GME8176_g	1261	226	211.9	39.28	-2.43152	4.6554e-167	1.32391e-165	ko00100//Steroid biosynthesis;ko01100//Metabolic pathways;ko01110//Biosynthesis of secondary metabolites	GO:0031224//intrinsic to membrane	GO:0046914//transition metal ion binding;GO:0003824//catalytic activity	GO:0006631//fatty acid metabolic process	gi|299749868|ref|XP_001836391.2|/1.12036e-149/fatty acid hydroxylase [Coprinopsis cinerea okayama7||130]
GME4482_g	67	12	11.26	2.09	-2.42963	3.07128e-10	1.81987e-09	-	-	-	-	-
GME1478_g	166	30	27.89	5.21	-2.42039	2.98608e-23	4.35517e-22	ko00650//Butanoate metabolism;ko04146//Peroxisome;ko01100//Metabolic pathways;ko00280//Valine, leucine and isoleucine degradation;ko00072//Synthesis and degradation of ketone bodies;ko00281//Geraniol degradation;ko01110//Biosynthesis of secondary metabolites	-	-	-	gi|302682664|ref|XP_003031013.1|/3.04897e-100/hypothetical protein SCHCODRAFT_109940 [Schizophyllum commune H4-8]
GME8168_g	105	19	17.64	3.3	-2.41831	3.29564e-15	3.57434e-14	ko03010//Ribosome;ko01100//Metabolic pathways;ko00340//Histidine metabolism;ko00500//Starch and sucrose metabolism;ko01110//Biosynthesis of secondary metabolites	GO:0030529//ribonucleoprotein complex	GO:0035251//UDP-glucosyltransferase activity	GO:0044249//cellular biosynthetic process;GO:0005991//trehalose metabolic process	gi|336370599|gb|EGN98939.1|/1.77555e-109/glycosyltransferase family 20 protein [Serpula lacrymans var. lacrymans S7.3]
GME2085_g	83	15	13.95	2.61	-2.41814	2.60932e-12	1.85666e-11	-	-	-	-	gi|299743664|ref|XP_001835905.2|/1.16545e-40/hypothetical protein CC1G_02993 [Coprinopsis cinerea okayama7||130]
GME11658_g	137	25	23.02	4.34	-2.40712	2.56496e-19	3.40779e-18	-	-	-	-	gi|242215243|ref|XP_002473438.1|/4.13052e-54/predicted protein [Postia placenta Mad-698-R]
GME8582_g	680	124	114.27	21.55	-2.40669	7.65192e-90	1.85368e-88	-	-	-	-	gi|336386444|gb|EGO27590.1|/7.87506e-107/hypothetical protein SERLADRAFT_367152 [Serpula lacrymans var. lacrymans S7.9]
GME11204_g	170	31	28.57	5.39	-2.40614	1.22912e-23	1.80194e-22	ko00760//Nicotinate and nicotinamide metabolism;ko01100//Metabolic pathways;ko00230//Purine metabolism;ko00521//Streptomycin biosynthesis;ko00523//Polyketide sugar unit biosynthesis;ko01110//Biosynthesis of secondary metabolites;ko00240//Pyrimidine metabolism	-	-	-	gi|170107161|ref|XP_001884791.1|/1.54571e-118/predicted protein [Laccaria bicolor S238N-H82]
GME7492_g	345	63	57.97	10.95	-2.40438	2.32692e-46	4.67749e-45	ko00624//Polycyclic aromatic hydrocarbon degradation;ko01100//Metabolic pathways;ko00627//Aminobenzoate degradation;ko00363//Bisphenol degradation;ko01110//Biosynthesis of secondary metabolites;ko00903//Limonene and pinene degradation;ko00945//Stilbenoid, diarylheptanoid and gingerol biosynthesis;ko01120//Microbial metabolism in diverse environments;ko01100//Metabolic pathways;ko00360//Phenylalan…	-	GO:0016491//oxidoreductase activity;GO:0005506//iron ion binding	-	gi|170103023|ref|XP_001882727.1|/1.52328e-160/predicted protein [Laccaria bicolor S238N-H82]
GME3115_g	60	11	10.08	1.91	-2.39985	3.58296e-09	1.92457e-08	ko01100//Metabolic pathways;ko00930//Caprolactam degradation;ko00053//Ascorbate and aldarate metabolism;ko00030//Pentose phosphate pathway;ko01120//Microbial metabolism in diverse environments;ko01110//Biosynthesis of secondary metabolites	-	-	-	gi|392562955|gb|EIW56135.1|/1.07937e-137/D-lactonohydrolase-like protein [Trametes versicolor FP-101664 SS1]
GME10547_g	277	51	46.55	8.86	-2.3934	2.52396e-37	4.58573e-36	-	-	-	-	gi|390595400|gb|EIN04805.1|/1.79067e-25/hypothetical protein PUNSTDRAFT_92211 [Punctularia strigosozonata HHB-11173 SS5]
GME3352_g	54	10	9.07	1.74	-2.38202	2.5019e-08	1.24335e-07	ko00260//Glycine, serine and threonine metabolism	-	-	-	gi|299739097|ref|XP_001835052.2|/6.46335e-131/aryl-alcohol oxidase [Coprinopsis cinerea okayama7||130]
GME10068_g	382	71	64.19	12.34	-2.37901	1.54574e-50	3.21356e-49	ko00650//Butanoate metabolism	-	GO:0003824//catalytic activity	-	gi|392593874|gb|EIW83199.1|/0/acetoacetate-CoA ligase [Coniophora puteana RWD-64-598 SS2]
GME6184_g	43	8	7.23	1.39	-2.37891	7.40192e-07	3.15165e-06	-	-	GO:0046872//metal ion binding;GO:0003824//catalytic activity	GO:0008152//metabolic process	gi|353243326|emb|CCA74881.1|/0/related to nitric-oxide synthase, salivary gland [Piriformospora indica DSM 11827]
GME2967_g	437	82	73.43	14.25	-2.36541	3.41588e-57	7.2978e-56	-	-	-	-	gi|336375555|gb|EGO03891.1|/1.06589e-09/hypothetical protein SERLA73DRAFT_84078 [Serpula lacrymans var. lacrymans S7.3]
GME11832_g	64	12	10.75	2.09	-2.36276	1.43914e-09	7.99802e-09	ko03013//RNA transport	-	GO:0016491//oxidoreductase activity	GO:0008152//metabolic process	gi|242212761|ref|XP_002472212.1|/3.58688e-21/predicted protein [Postia placenta Mad-698-R]
GME10065_g	53	10	8.91	1.74	-2.35634	4.18004e-08	2.03102e-07	ko01100//Metabolic pathways;ko00510//N-Glycan biosynthesis	-	-	-	gi|242221397|ref|XP_002476448.1|/3.59931e-71/predicted protein [Postia placenta Mad-698-R]
GME4585_g	5511	1053	926.08	183.01	-2.33921	0	0	-	GO:0043231//intracellular membrane-bounded organelle	GO:0030234//enzyme regulator activity	GO:0006140	gi|299740862|ref|XP_001834059.2|/1.55875e-16/hypothetical protein CC1G_11029 [Coprinopsis cinerea okayama7||130]
GME5306_g	1055	202	177.28	35.11	-2.33608	1.20775e-133	3.26016e-132	-	-	-	-	gi|170109791|ref|XP_001886102.1|/2.04606e-42/predicted protein [Laccaria bicolor S238N-H82]
GME9559_g	271	52	45.54	9.04	-2.33274	1.63133e-35	2.88382e-34	-	-	-	-	-
GME1648_g	213	41	35.79	7.13	-2.32758	3.54038e-28	5.5338e-27	-	-	GO:0008233//peptidase activity	-	gi|169850244|ref|XP_001831819.1|/7.90562e-118/aminopeptidase [Coprinopsis cinerea okayama7||130]
GME1233_g	67	13	11.26	2.26	-2.31681	9.57662e-10	5.39987e-09	-	-	-	-	gi|302697921|ref|XP_003038639.1|/2.48923e-06/hypothetical protein SCHCODRAFT_231454 [Schizophyllum commune H4-8]
GME263_g	77	15	12.94	2.61	-2.30972	5.5709e-11	3.52451e-10	-	-	-	-	gi|170087638|ref|XP_001875042.1|/0/predicted protein [Laccaria bicolor S238N-H82]
GME3660_g	41	8	6.89	1.39	-2.30942	2.0629e-06	8.34086e-06	ko02010//ABC transporters;ko04976//Bile secretion	-	GO:0017111//nucleoside-triphosphatase activity	-	gi|170099584|ref|XP_001881010.1|/0/multidrug resistance-associated ABC transporter [Laccaria bicolor S238N-H82]
GME11668_g	41	8	6.89	1.39	-2.30942	2.0629e-06	8.3369e-06	ko03060//Protein export	-	-	-	gi|390603910|gb|EIN13301.1|/1.67427e-166/hypothetical protein PUNSTDRAFT_128989 [Punctularia strigosozonata HHB-11173 SS5]
GME441_g	56	11	9.41	1.91	-2.30062	2.7604e-08	1.36702e-07	-	-	-	-	gi|189201471|ref|XP_001937072.1|/1.52873e-134/ABC transporter ATP-binding protein uup-1 [Pyrenophora tritici-repentis Pt-1C-BFP]
GME7644_g	51	10	8.57	1.74	-2.30021	1.15733e-07	5.37746e-07	-	-	-	-	-
GME1941_g	661	130	111.08	22.59	-2.29784	9.48322e-83	2.2524e-81	ko00460//Cyanoamino acid metabolism	-	-	-	gi|170107867|ref|XP_001885143.1|/1.74117e-79/predicted protein [Laccaria bicolor S238N-H82]
GME2904_g	192	38	32.26	6.6	-2.28921	4.77292e-25	7.22138e-24	-	-	-	-	gi|170111312|ref|XP_001886860.1|/1.74987e-163/predicted protein [Laccaria bicolor S238N-H82]
GME11248_g	45	9	7.56	1.56	-2.27684	8.08312e-07	3.42626e-06	ko04146//Peroxisome;ko01100//Metabolic pathways;ko00590//Arachidonic acid metabolism;ko04976//Bile secretion;ko00980//Metabolism of xenobiotics by cytochrome P450	-	-	-	gi|336365770|gb|EGN94119.1|/3.49683e-72/hypothetical protein SERLA73DRAFT_188704 [Serpula lacrymans var. lacrymans S7.3]
GME5094_g	240	48	40.33	8.34	-2.27373	1.06788e-30	1.74284e-29	-	-	-	-	-
GME3229_g	225	45	37.81	7.82	-2.27353	7.11362e-29	1.1243e-27	ko00982//Drug metabolism - cytochrome P450;ko01120//Microbial metabolism in diverse environments;ko00680//Methane metabolism	-	-	-	gi|299738610|ref|XP_001834659.2|/0/hypothetical protein CC1G_05796 [Coprinopsis cinerea okayama7||130]
GME2243_g	40	8	6.72	1.39	-2.27338	3.4262e-06	1.34688e-05	ko05164//Influenza A	-	-	-	gi|336375262|gb|EGO03598.1|/3.92768e-90/hypothetical protein SERLA73DRAFT_119288 [Serpula lacrymans var. lacrymans S7.3]
GME10384_g	50	10	8.4	1.74	-2.2713	1.91753e-07	8.70981e-07	-	-	-	-	gi|170097421|ref|XP_001879930.1|/1.07876e-61/predicted protein [Laccaria bicolor S238N-H82]
GME3141_g	64	13	10.75	2.26	-2.24994	4.32536e-09	2.31021e-08	-	-	-	-	gi|302674547|ref|XP_003026958.1|/9.99975e-88/hypothetical protein SCHCODRAFT_70942 [Schizophyllum commune H4-8]
GME9543_g	231	47	38.82	8.17	-2.24839	3.1329e-29	4.98859e-28	-	-	-	-	gi|299756472|ref|XP_001829358.2|/5.72922e-70/NtPRp27 [Coprinopsis cinerea okayama7||130]
GME1621_g	54	11	9.07	1.91	-2.24753	7.54352e-08	3.59342e-07	-	-	-	-	gi|170108854|ref|XP_001885635.1|/3.43572e-85/predicted protein [Laccaria bicolor S238N-H82]
GME11412_g	44	9	7.39	1.56	-2.24403	1.33634e-06	5.55099e-06	ko03010//Ribosome	GO:0030529//ribonucleoprotein complex	GO:0005198//structural molecule activity	GO:0010467//gene expression	gi|403418460|emb|CCM05160.1|/1.31378e-106/predicted protein [Fibroporia radiculosa]
GME8755_g	142	29	23.86	5.04	-2.2431	1.75345e-18	2.27975e-17	ko02010//ABC transporters;ko02020//Two-component system;ko01100//Metabolic pathways;ko00401//Novobiocin biosynthesis;ko00360//Phenylalanine metabolism;ko00340//Histidine metabolism;ko02040//Flagellar assembly;ko00400//Phenylalanine, tyrosine and tryptophan biosynthesis;ko02030//Bacterial chemotaxis;ko01110//Biosynthesis of secondary metabolites;ko00960//Tropane, piperidine and pyridine alkaloid b…	-	-	-	gi|170111501|ref|XP_001886954.1|/2.77667e-132/predicted protein [Laccaria bicolor S238N-H82]
GME6748_g	1575	323	264.67	56.14	-2.23709	1.89624e-188	5.52183e-187	ko01100//Metabolic pathways;ko00624//Polycyclic aromatic hydrocarbon degradation;ko00340//Histidine metabolism;ko00540//Lipopolysaccharide biosynthesis;ko01120//Microbial metabolism in diverse environments;ko00350//Tyrosine metabolism	-	-	-	gi|389749449|gb|EIM90620.1|/2.86653e-112/S-adenosyl-L-methionine-dependent methyltransferase [Stereum hirsutum FP-91666 SS1]
GME7204_g	239	49	40.16	8.52	-2.23683	5.111e-30	8.26214e-29	ko00650//Butanoate metabolism;ko01100//Metabolic pathways;ko00250//Alanine, aspartate and glutamate metabolism;ko04727//GABAergic synapse;ko04940//Type I diabetes mellitus;ko00410//beta-Alanine metabolism;ko01110//Biosynthesis of secondary metabolites;ko00430//Taurine and hypotaurine metabolism	-	GO:0016831//carboxy-lyase activity;GO:0048037//cofactor binding	GO:0009064//glutamine family amino acid metabolic process	gi|169867543|ref|XP_001840350.1|/0/glutamate decarboxylase [Coprinopsis cinerea okayama7||130]
GME10947_g	58	12	9.75	2.09	-2.2219	2.96776e-08	1.46204e-07	-	-	-	-	gi|170108188|ref|XP_001885303.1|/2.78776e-08/predicted protein [Laccaria bicolor S238N-H82]
GME3842_g	1903	395	319.78	68.65	-2.21975	4.0724e-225	1.25009e-223	-	-	-	-	gi|170097421|ref|XP_001879930.1|/5.1146e-53/predicted protein [Laccaria bicolor S238N-H82]
GME1057_g	6780	1408	1139.32	244.71	-2.21903	0	0	ko02010//ABC transporters;ko01100//Metabolic pathways;ko00710//Carbon fixation in photosynthetic organisms;ko00051//Fructose and mannose metabolism;ko00030//Pentose phosphate pathway;ko00010//Glycolysis / Gluconeogenesis;ko01120//Microbial metabolism in diverse environments;ko01110//Biosynthesis of secondary metabolites;ko00680//Methane metabolism	-	GO:0046914//transition metal ion binding;GO:0016832//aldehyde-lyase activity	GO:0006007//glucose catabolic process	gi|393242159|gb|EJD49678.1|/9.16371e-174/fructose-bisphosphate aldolase [Auricularia delicata TFB-10046 SS5]
GME3153_g	360	75	60.5	13.03	-2.2151	7.09308e-44	1.38331e-42	-	-	-	-	gi|170096152|ref|XP_001879296.1|/8.60048e-71/predicted protein [Laccaria bicolor S238N-H82]
GME10443_g	143	30	24.03	5.21	-2.20548	3.07546e-18	3.94429e-17	-	-	-	-	gi|5002510|dbj|BAA78625.1|/1.40015e-160/reverse transcriptase-RNase H-integrase [Tricholoma matsutake]
GME384_g	796	167	133.76	29.02	-2.20453	1.93178e-94	4.7337e-93	ko01100//Metabolic pathways;ko00500//Starch and sucrose metabolism	-	GO:0003824//catalytic activity	-	gi|336363419|gb|EGN91810.1|/0/glycoside hydrolase family 5 protein [Serpula lacrymans var. lacrymans S7.3]
GME2233_g	379	80	63.69	13.9	-2.19598	1.23695e-45	2.46319e-44	-	-	-	-	gi|390603253|gb|EIN12645.1|/2.58314e-09/hypothetical protein PUNSTDRAFT_49934 [Punctularia strigosozonata HHB-11173 SS5]
GME1895_g	1829	389	307.35	67.61	-2.18457	3.29536e-212	9.93633e-211	ko04011//MAPK signaling pathway - yeast;ko00650//Butanoate metabolism;ko00280//Valine, leucine and isoleucine degradation;ko00072//Synthesis and degradation of ketone bodies	-	-	-	gi|299743633|ref|XP_002910688.1|/1.4085e-157/CAIB/BAIF family enzyme [Coprinopsis cinerea okayama7||130]
GME5547_g	89	19	14.96	3.3	-2.18057	1.01712e-11	6.81527e-11	-	-	-	-	gi|170088324|ref|XP_001875385.1|/0/predicted protein [Laccaria bicolor S238N-H82]
GME10906_g	42	9	7.06	1.56	-2.17812	3.61504e-06	1.41522e-05	-	-	-	-	gi|170104116|ref|XP_001883272.1|/3.64426e-61/predicted protein [Laccaria bicolor S238N-H82]
GME4663_g	56	12	9.41	2.09	-2.17069	7.97238e-08	3.77866e-07	ko00520//Amino sugar and nucleotide sugar metabolism;ko01110//Biosynthesis of secondary metabolites	-	GO:0003824//catalytic activity	-	gi|220682959|gb|ACL80318.1|/4.16217e-129/acetyl xylan esterase II [Volvariella volvacea]
GME6520_g	51	11	8.57	1.91	-2.16572	3.33578e-07	1.47576e-06	-	-	-	-	gi|336365385|gb|EGN93736.1|/8.00988e-40/hypothetical protein SERLA73DRAFT_163468 [Serpula lacrymans var. lacrymans S7.3]
GME11757_g	88	19	14.79	3.3	-2.16408	1.65669e-11	1.08778e-10	ko00514//Other types of O-glycan biosynthesis	-	-	-	gi|238573778|ref|XP_002387428.1|/2.52737e-19/hypothetical protein MPER_13843 [Moniliophthora perniciosa FA553]
GME772_g	60	13	10.08	2.26	-2.1571	3.12112e-08	1.53227e-07	-	GO:0044464//cell part	GO:0016790//thiolester hydrolase activity	GO:0019941//modification-dependent protein catabolic process	gi|302680909|ref|XP_003030136.1|/8.23559e-139/hypothetical protein SCHCODRAFT_85551 [Schizophyllum commune H4-8]
GME2395_g	295	64	49.57	11.12	-2.15631	4.20782e-35	7.36195e-34	-	-	-	GO:0008152//metabolic process	gi|170096560|ref|XP_001879500.1|/5.2027e-84/predicted protein [Laccaria bicolor S238N-H82]
GME1149_g	46	10	7.73	1.74	-2.15138	1.40121e-06	5.75579e-06	-	-	-	-	gi|336373121|gb|EGO01459.1|/1.09136e-09/hypothetical protein SERLA73DRAFT_70645 [Serpula lacrymans var. lacrymans S7.3]
GME9278_g	1024	223	172.07	38.76	-2.15036	2.48046e-117	6.52983e-116	ko01100//Metabolic pathways;ko00230//Purine metabolism;ko00232//Caffeine metabolism;ko01120//Microbial metabolism in diverse environments	-	GO:0016663//oxidoreductase activity, acting on other nitrogenous compounds as donors, oxygen as acceptor	GO:0009112	gi|336383841|gb|EGO24990.1|/1.07321e-90/hypothetical protein SERLADRAFT_356374 [Serpula lacrymans var. lacrymans S7.9]
GME2453_g	3336	727	560.59	126.35	-2.14952	0	0	-	-	-	-	gi|170117559|ref|XP_001889966.1|/2.72144e-151/predicted protein [Laccaria bicolor S238N-H82]
GME5317_g	73	16	12.27	2.78	-2.14198	1.16e-09	6.50624e-09	-	-	GO:0000166//nucleotide binding	-	gi|170087144|ref|XP_001874795.1|/0/predicted protein [Laccaria bicolor S238N-H82]
GME10512_g	294	65	49.4	11.3	-2.12819	1.86281e-34	3.22596e-33	ko04140//Regulation of autophagy	-	-	-	gi|170099363|ref|XP_001880900.1|/4.73967e-99/hypothetical protein LACBIDRAFT_297100 [Laccaria bicolor S238N-H82]
GME2831_g	63	14	10.59	2.43	-2.12367	1.98733e-08	9.96358e-08	-	-	-	-	gi|170089757|ref|XP_001876101.1|/3.52219e-84/predicted protein [Laccaria bicolor S238N-H82]
GME7596_g	13531	3003	2273.77	521.91	-2.12321	0	0	ko01100//Metabolic pathways;ko00310//Lysine degradation;ko00780//Biotin metabolism	-	-	-	gi|390598089|gb|EIN07488.1|/3.21448e-81/class I glutamine amidotransferase-like protein [Punctularia strigosozonata HHB-11173 SS5]
GME729_g	76	17	12.77	2.95	-2.11397	7.3962e-10	4.20668e-09	-	-	-	-	gi|299751594|ref|XP_001830369.2|/2.74982e-162/hypothetical protein CC1G_02005 [Coprinopsis cinerea okayama7||130]
GME5205_g	11636	2600	1955.33	451.87	-2.11343	0	0	ko04260//Cardiac muscle contraction;ko05016//Huntington's disease;ko01100//Metabolic pathways;ko00190//Oxidative phosphorylation;ko05010//Alzheimer's disease;ko05012//Parkinson's disease	-	GO:0015002//heme-copper terminal oxidase activity	-	gi|170103196|ref|XP_001882813.1|/4.33554e-50/predicted protein [Laccaria bicolor S238N-H82]
GME1750_g	134	30	22.52	5.21	-2.11185	2.40152e-16	2.70107e-15	-	-	-	-	gi|170099489|ref|XP_001880963.1|/0/predicted protein [Laccaria bicolor S238N-H82]
GME6431_g	299	68	50.24	11.82	-2.08761	3.34234e-34	5.7414e-33	ko03010//Ribosome	GO:0030529//ribonucleoprotein complex	GO:0005198//structural molecule activity	GO:0010467//gene expression	gi|392564433|gb|EIW57611.1|/6.68982e-167/60S ribosomal protein L4/L1/L2 [Trametes versicolor FP-101664 SS1]
GME4303_g	88	20	14.79	3.48	-2.08746	4.50276e-11	2.85724e-10	-	-	-	-	gi|170105092|ref|XP_001883759.1|/1.35835e-172/predicted protein [Laccaria bicolor S238N-H82]
GME6597_g	66	15	11.09	2.61	-2.08714	1.25875e-08	6.4438e-08	ko03410//Base excision repair;ko00970//Aminoacyl-tRNA biosynthesis;ko00450//Selenocompound metabolism	-	-	-	gi|336386917|gb|EGO28063.1|/8.62207e-151/hypothetical protein SERLADRAFT_462513 [Serpula lacrymans var. lacrymans S7.9]
GME11953_g	246	56	41.34	9.73	-2.08703	2.16012e-28	3.3951e-27	-	-	-	-	-
GME1097_g	294	67	49.4	11.64	-2.08542	1.34235e-33	2.29196e-32	ko00624//Polycyclic aromatic hydrocarbon degradation;ko01100//Metabolic pathways;ko00627//Aminobenzoate degradation;ko00363//Bisphenol degradation;ko01110//Biosynthesis of secondary metabolites;ko00903//Limonene and pinene degradation;ko00945//Stilbenoid, diarylheptanoid and gingerol biosynthesis;ko01120//Microbial metabolism in diverse environments;ko01100//Metabolic pathways;ko00590//Arachidoni…	-	-	-	gi|170099888|ref|XP_001881162.1|/4.90529e-139/predicted protein [Laccaria bicolor S238N-H82]
GME176_g	2162	494	363.31	85.86	-2.08114	1.25869e-235	3.89188e-234	-	-	-	-	-
GME2409_g	48	11	8.07	1.91	-2.079	1.43441e-06	5.88933e-06	-	-	-	-	gi|170096710|ref|XP_001879575.1|/3.37603e-49/predicted protein [Laccaria bicolor S238N-H82]
GME1081_g	74	17	12.44	2.95	-2.0762	1.92941e-09	1.05912e-08	-	-	-	-	-
GME3526_g	78	18	13.11	3.13	-2.06643	7.56568e-10	4.3002e-09	-	-	-	-	gi|389750795|gb|EIM91868.1|/7.49955e-171/FAD/NAD-P-binding domain-containing protein [Stereum hirsutum FP-91666 SS1]
GME4075_g	43	10	7.23	1.74	-2.05491	6.0099e-06	2.28033e-05	ko02010//ABC transporters;ko02010//ABC transporters;ko04976//Bile secretion	-	-	-	gi|336380282|gb|EGO21436.1|/2.57156e-84/hypothetical protein SERLADRAFT_417697 [Serpula lacrymans var. lacrymans S7.9]
GME4241_g	495	116	83.18	20.16	-2.04474	3.9892e-54	8.39608e-53	ko04120//Ubiquitin mediated proteolysis	-	GO:0016874//ligase activity	-	gi|336363601|gb|EGN91981.1|/0/hypothetical protein SERLA73DRAFT_173202 [Serpula lacrymans var. lacrymans S7.3]
GME904_g	72	17	12.1	2.95	-2.03622	4.98656e-09	2.64509e-08	-	GO:0031090//organelle membrane	GO:0016667//oxidoreductase activity, acting on a sulfur group of donors;GO:0050662//coenzyme binding	GO:0006457//protein folding	gi|170093139|ref|XP_001877791.1|/0/predicted protein [Laccaria bicolor S238N-H82]
GME6962_g	577	136	96.96	23.64	-2.03616	1.7326e-62	3.7775e-61	ko05340//Primary immunodeficiency;ko01100//Metabolic pathways;ko00230//Purine metabolism	-	-	-	gi|302685548|ref|XP_003032454.1|/1.23936e-97/hypothetical protein SCHCODRAFT_54614 [Schizophyllum commune H4-8]
GME4719_g	93	22	15.63	3.82	-2.03267	2.89046e-11	1.8676e-10	-	-	-	-	gi|336375887|gb|EGO04222.1|/7.36684e-48/hypothetical protein SERLA73DRAFT_67932 [Serpula lacrymans var. lacrymans S7.3]
GME9640_g	181	43	30.42	7.47	-2.02584	1.54791e-20	2.12632e-19	-	-	-	-	gi|170084417|ref|XP_001873432.1|/5.26823e-95/RSC complex protein [Laccaria bicolor S238N-H82]
GME10876_g	63	15	10.59	2.61	-2.02058	5.24838e-08	2.52272e-07	-	-	-	-	gi|170109101|ref|XP_001885758.1|/4.04311e-53/predicted protein [Laccaria bicolor S238N-H82]
GME2883_g	71	17	11.93	2.95	-2.01581	7.98754e-09	4.177e-08	ko00071//Fatty acid metabolism;ko00627//Aminobenzoate degradation;ko00380//Tryptophan metabolism;ko01120//Microbial metabolism in diverse environments	-	GO:0016491//oxidoreductase activity;GO:0005506//iron ion binding	-	gi|170111410|ref|XP_001886909.1|/0/cytochrome P450 monooxygenase CYP63 [Laccaria bicolor S238N-H82]
GME1703_g	96	23	16.13	4	-2.01167	1.81711e-11	1.18762e-10	-	-	GO:0070011	GO:0008152//metabolic process	gi|170115244|ref|XP_001888817.1|/2.40048e-157/predicted protein [Laccaria bicolor S238N-H82]
GME4540_g	1221	293	205.18	50.92	-2.01059	4.0693e-128	1.08468e-126	-	-	-	-	gi|393214276|gb|EJC99769.1|/7.02616e-159/hypothetical protein FOMMEDRAFT_148609 [Fomitiporia mediterranea MF3/22]
GME7986_g	79	19	13.28	3.3	-2.00872	1.22225e-09	6.84185e-09	ko00750//Vitamin B6 metabolism;ko03440//Homologous recombination	-	-	GO:0009108//coenzyme biosynthetic process	gi|170094136|ref|XP_001878289.1|/2.48987e-146/predicted protein [Laccaria bicolor S238N-H82]
GME2416_g	50	12	8.4	2.09	-2.00689	1.4394e-06	5.90409e-06	-	-	-	-	gi|300431582|tpe|CBL43327.1|/2.35415e-37/TPA: arylamine N-acetyltransferase 1 [Coprinopsis cinerea]
GME2840_g	83	20	13.95	3.48	-2.00311	4.78938e-10	2.77223e-09	-	-	-	-	gi|336369121|gb|EGN97463.1|/2.18772e-42/hypothetical protein SERLA73DRAFT_184181 [Serpula lacrymans var. lacrymans S7.3]
